# Supplementary material for: Development and Experimental Validation of a Novel Prognostic Signature for Gastric Cancer
Source: MDPI journal article supplement (doi:10.3390/cancers15051610), 2023-03-05

Figure S1

**A**

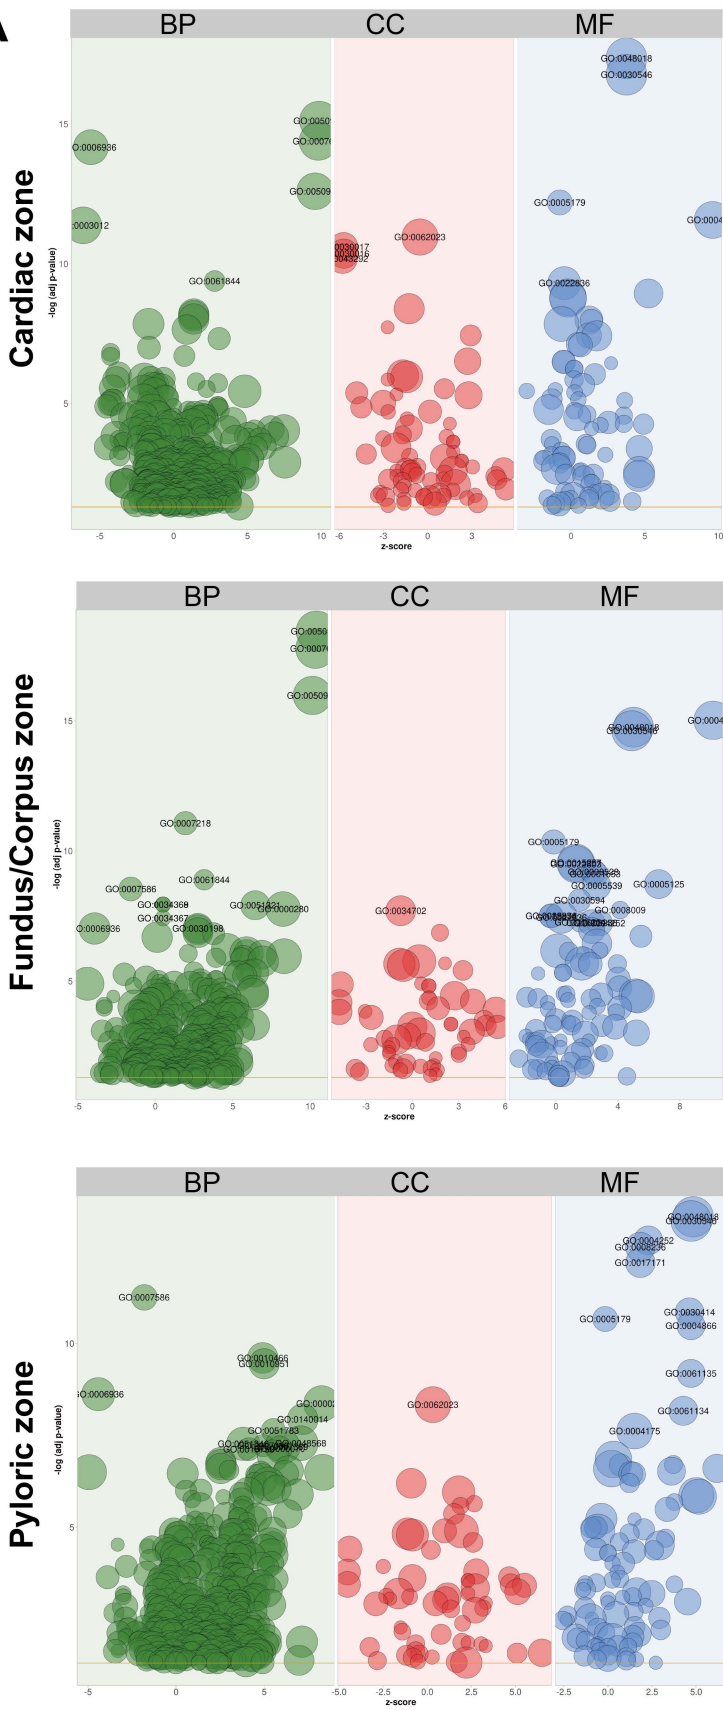

**B**

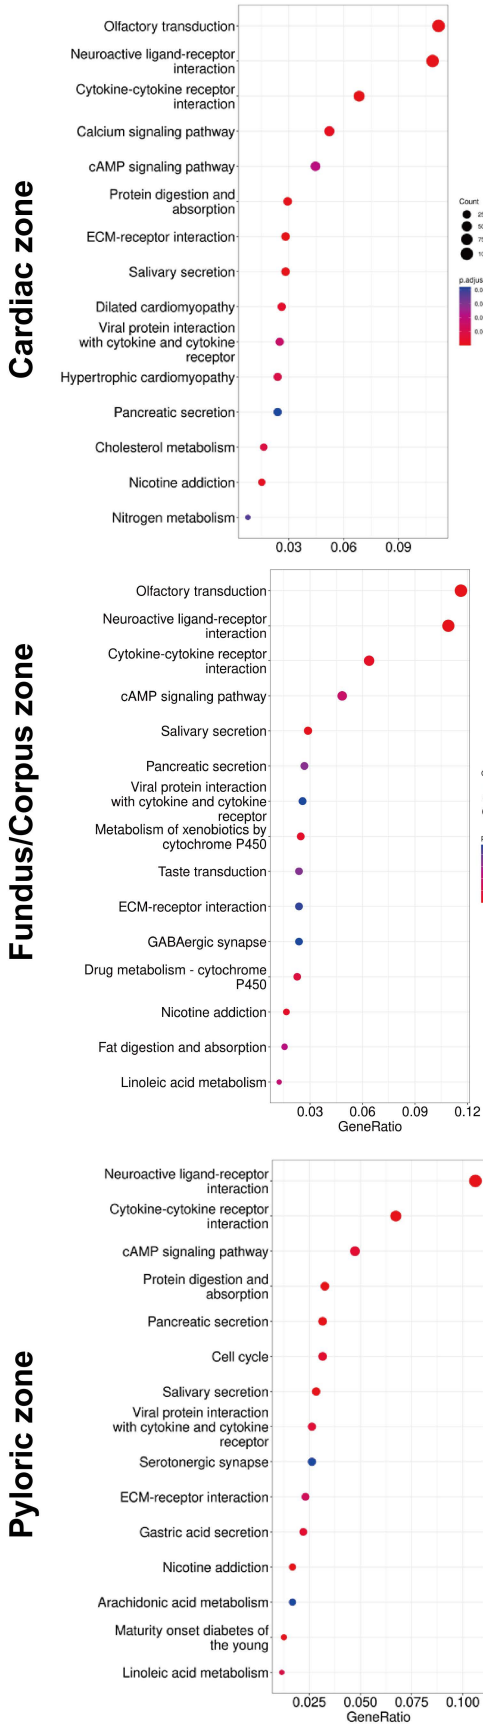

**C**

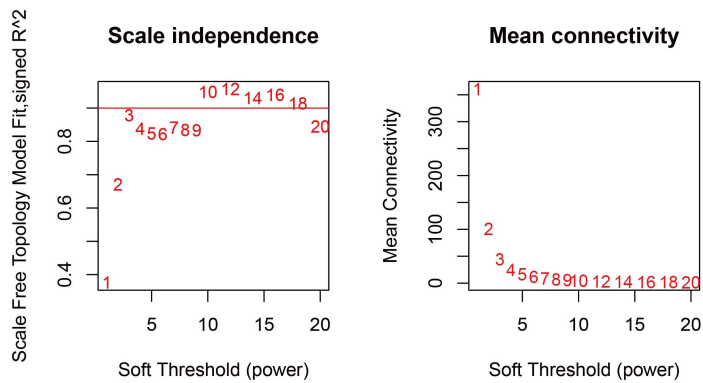

**A**

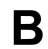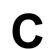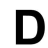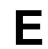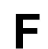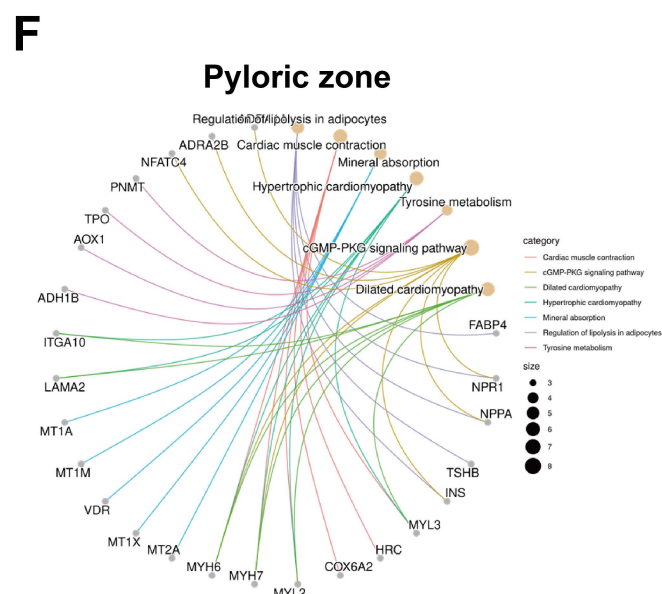

Figure S3

**A**

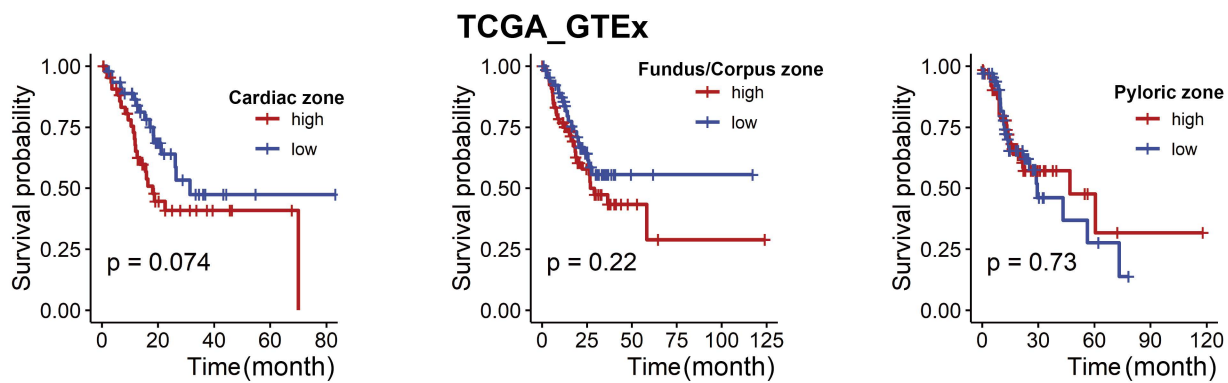

**B**

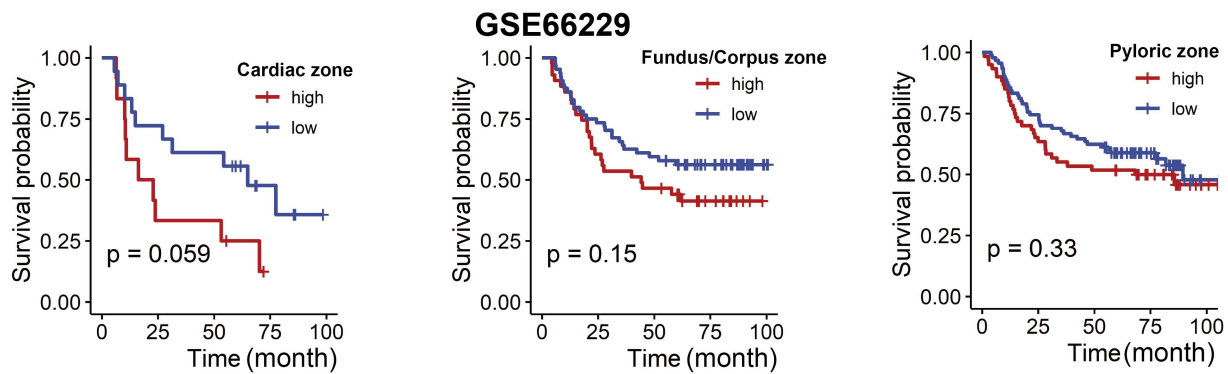

**C**

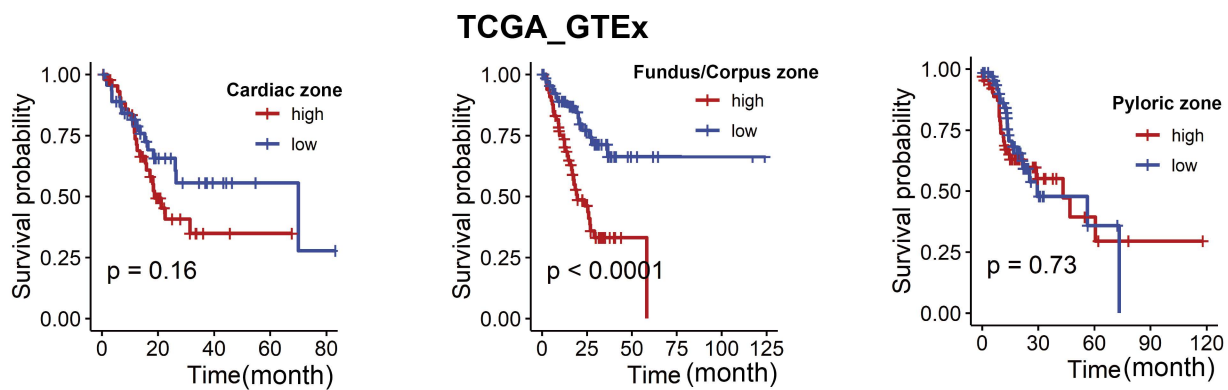

**D**

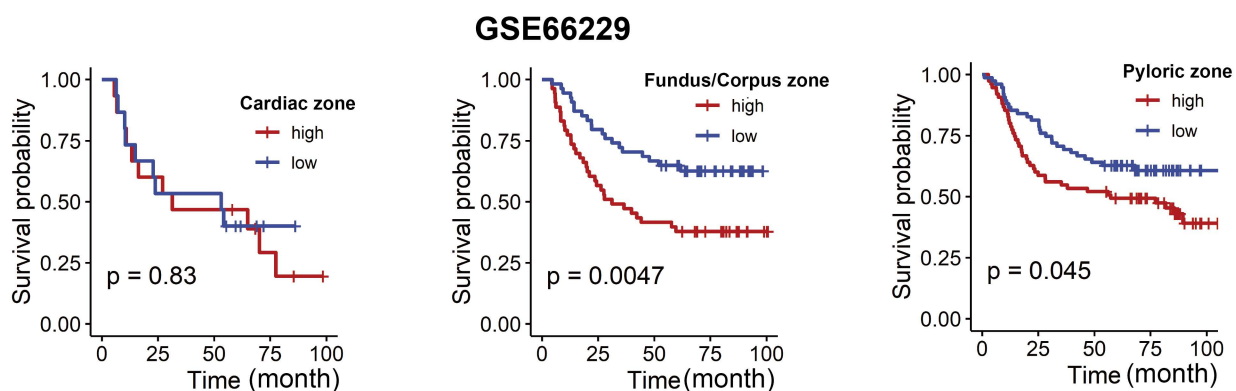

**E**

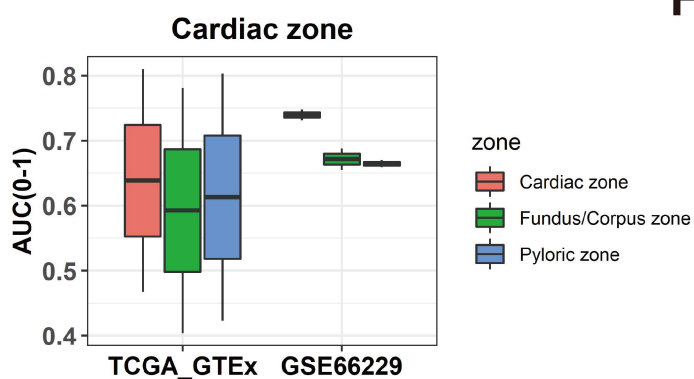

**F**

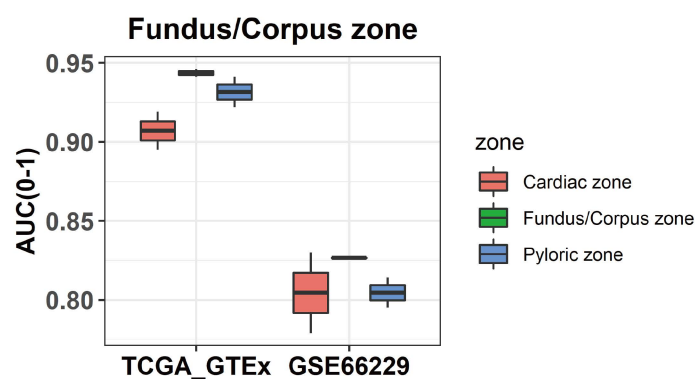



Figure S4

A

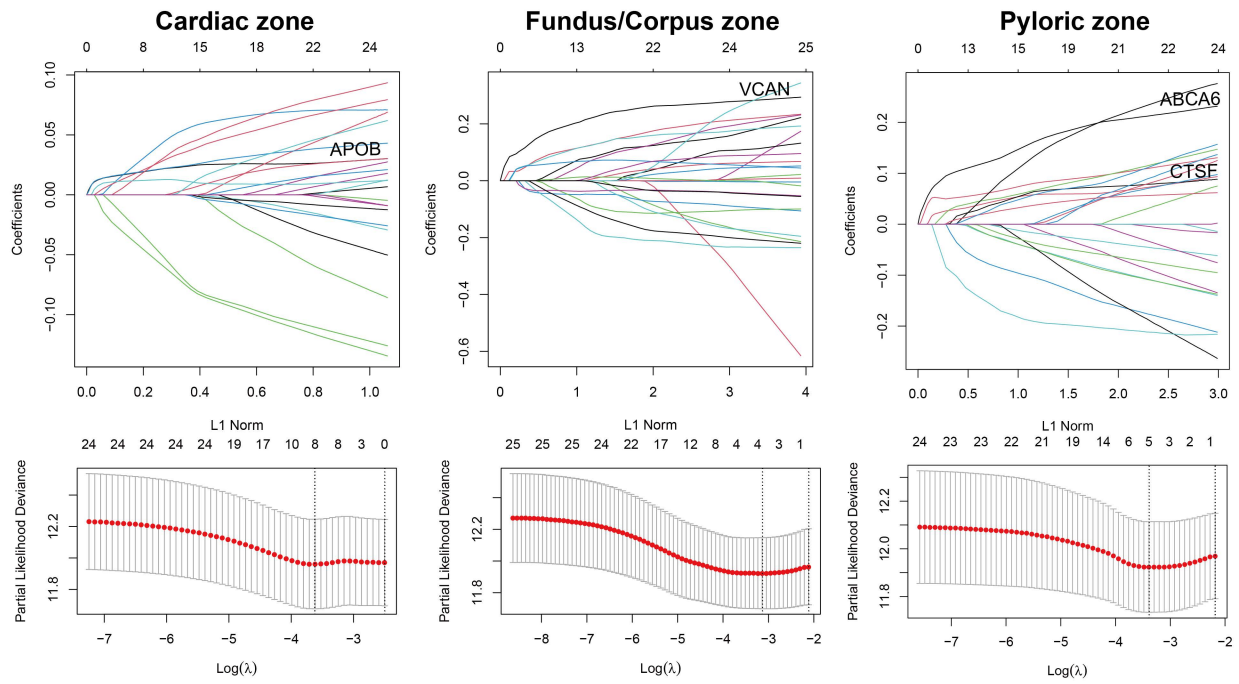

B

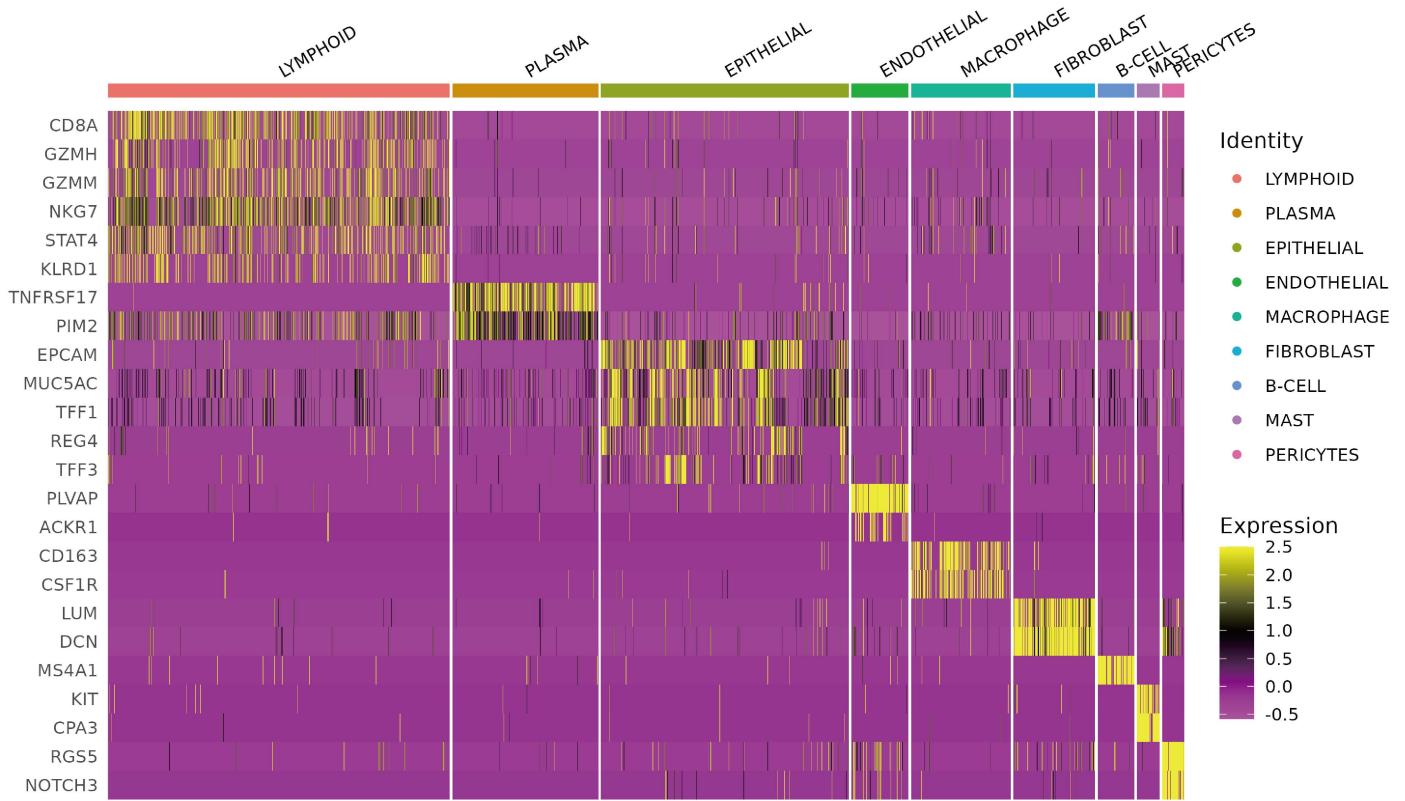

C

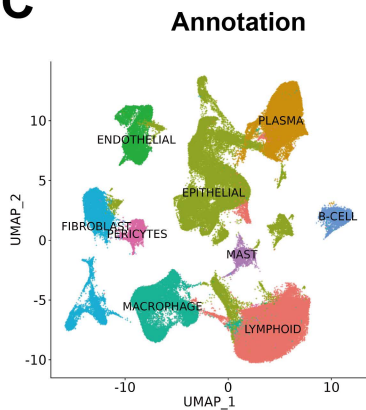

D

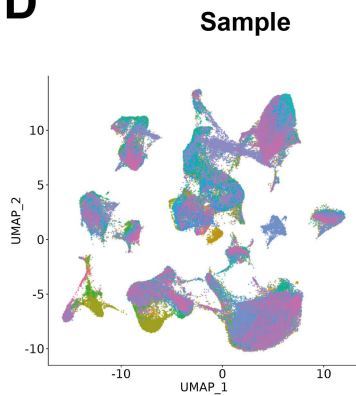

E

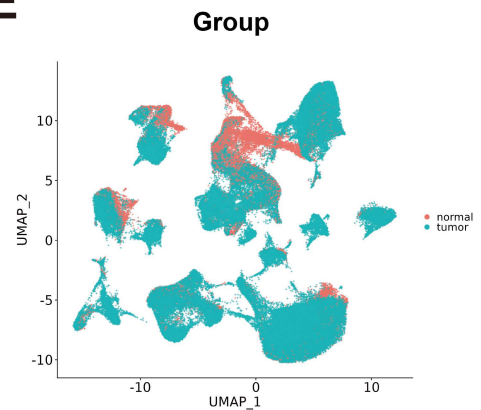



Figure S5

**A**

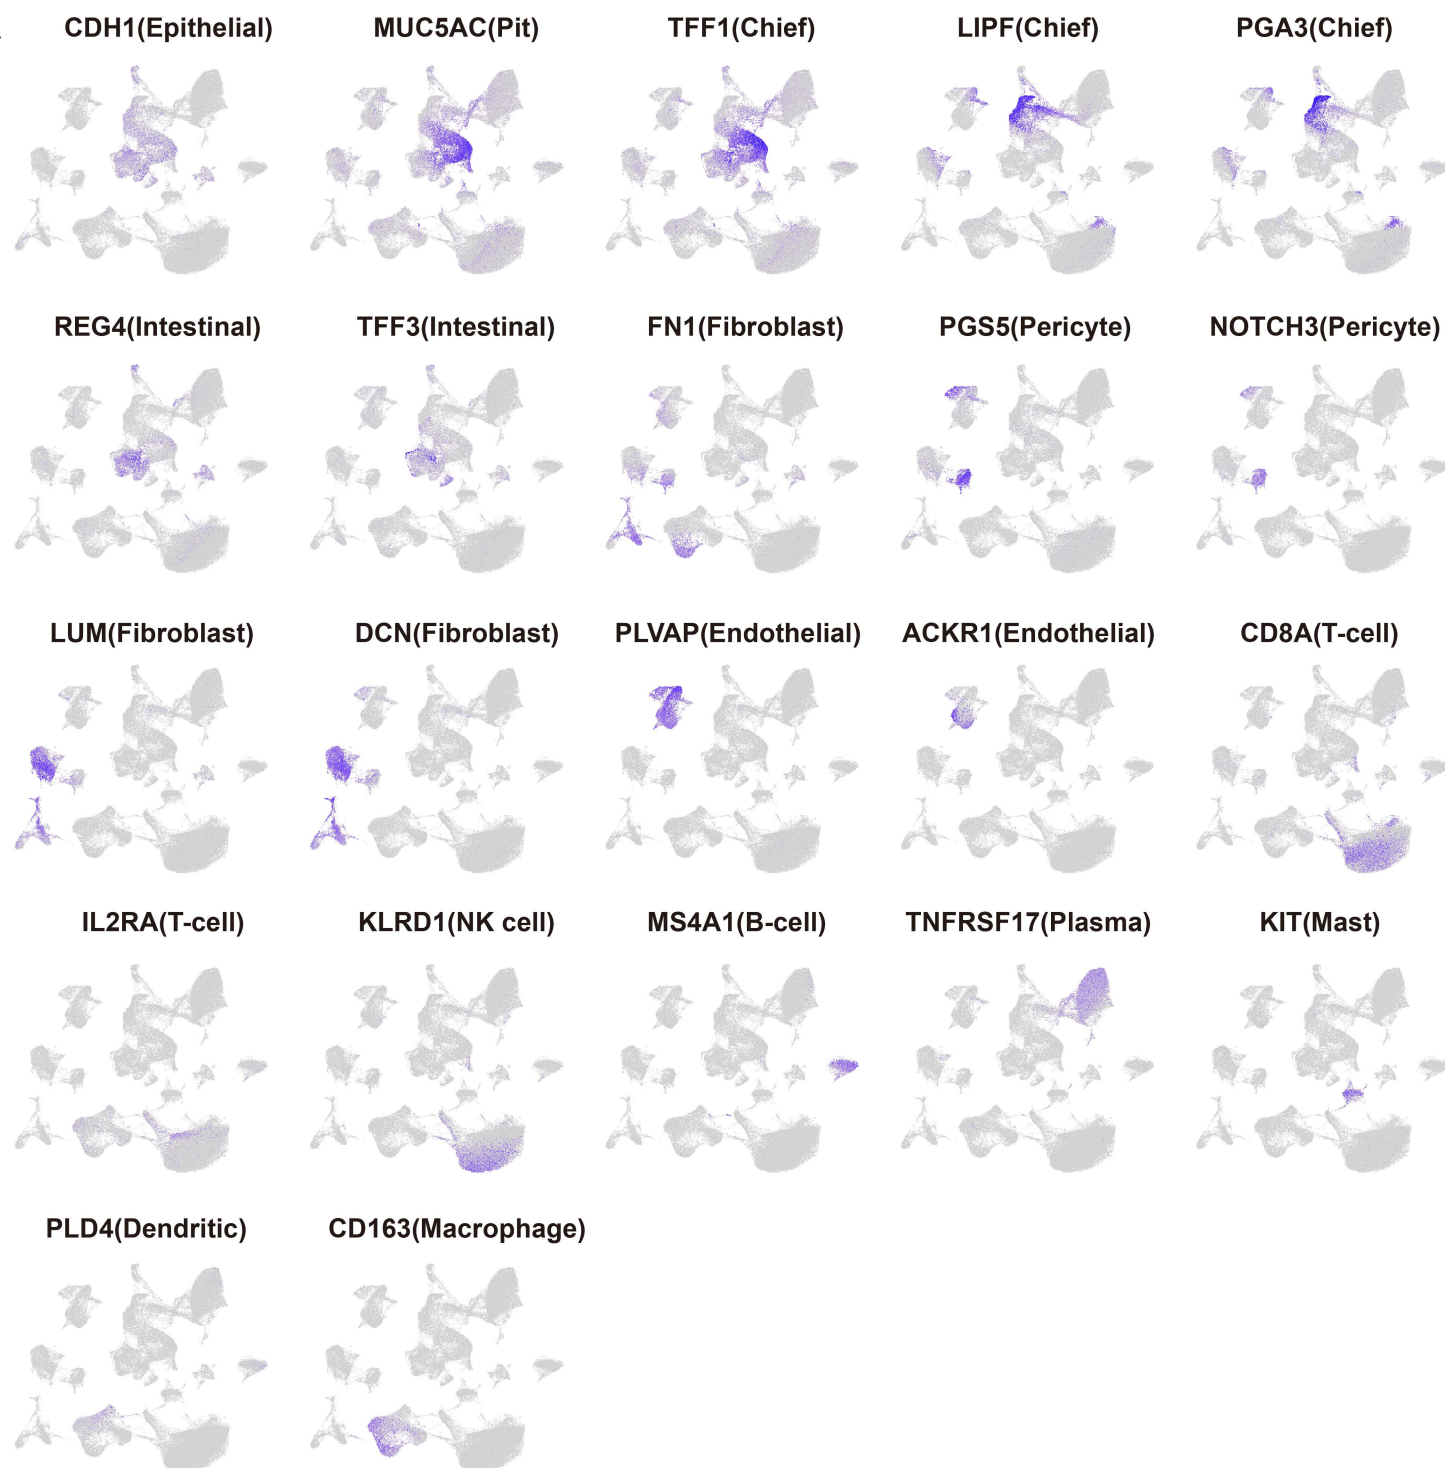

**B**

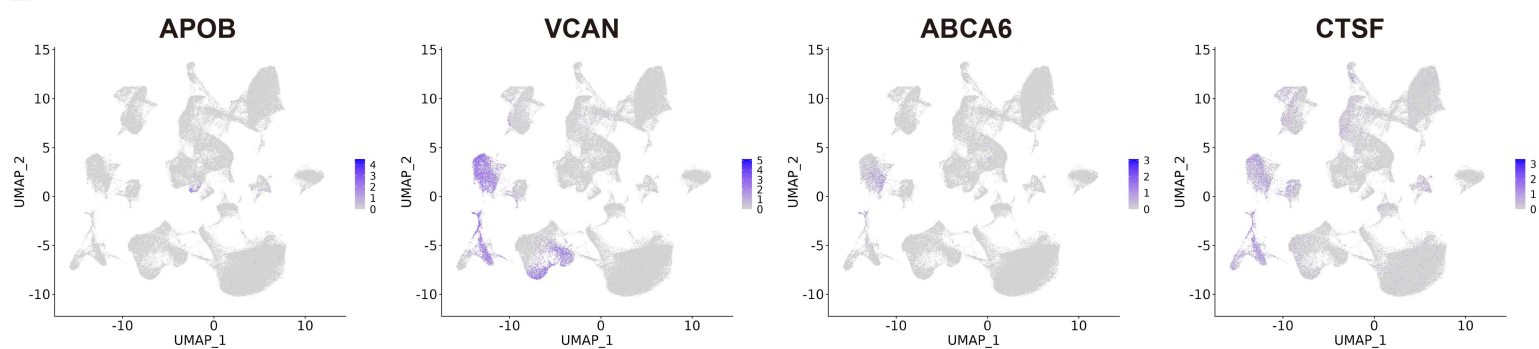

Figure S6

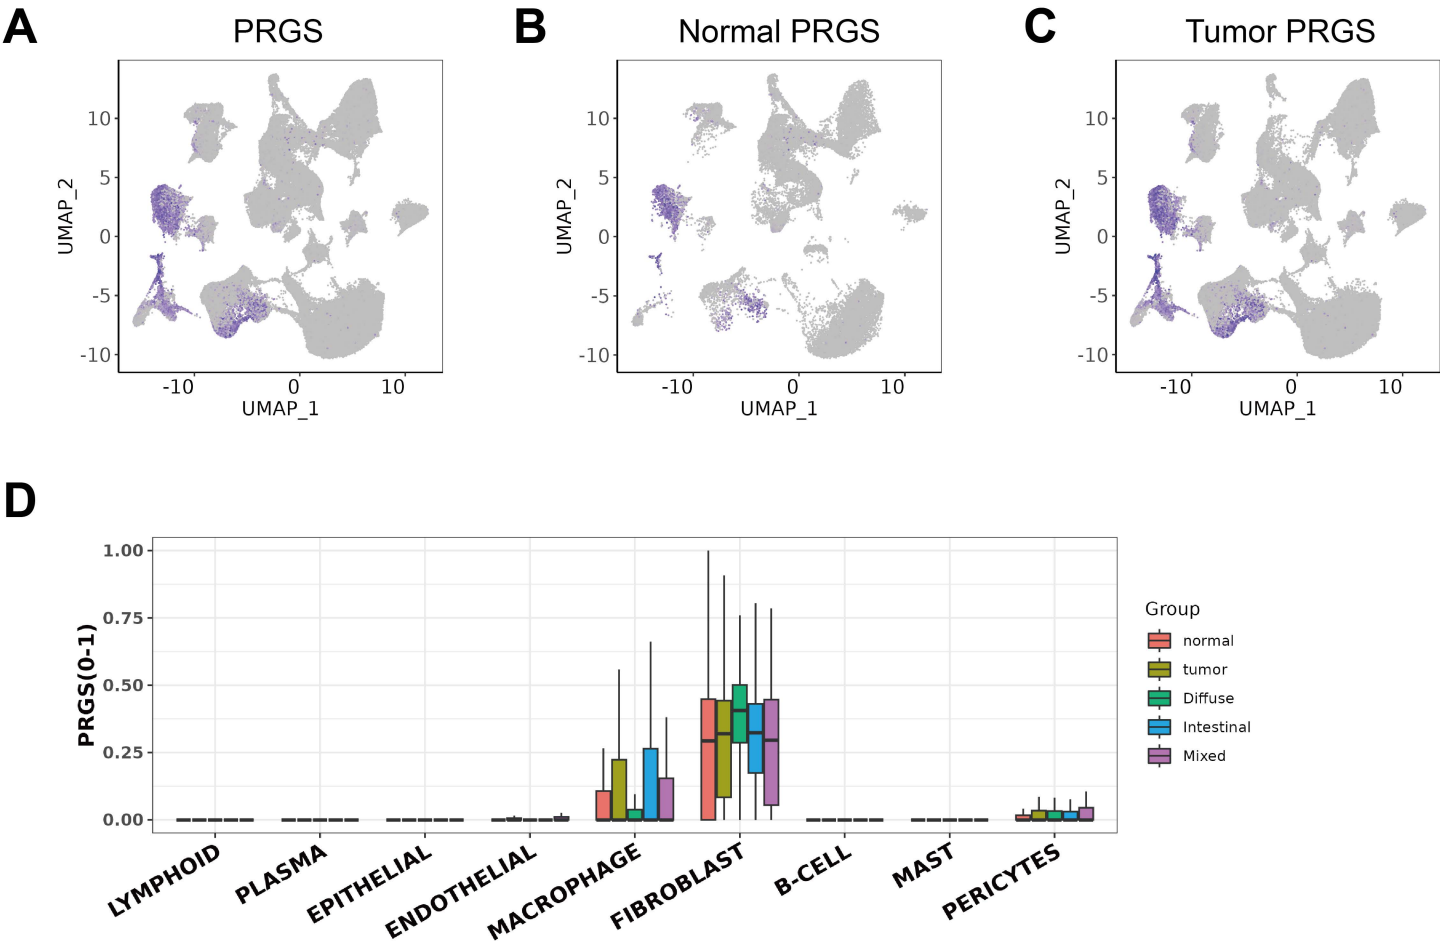

Figure S7

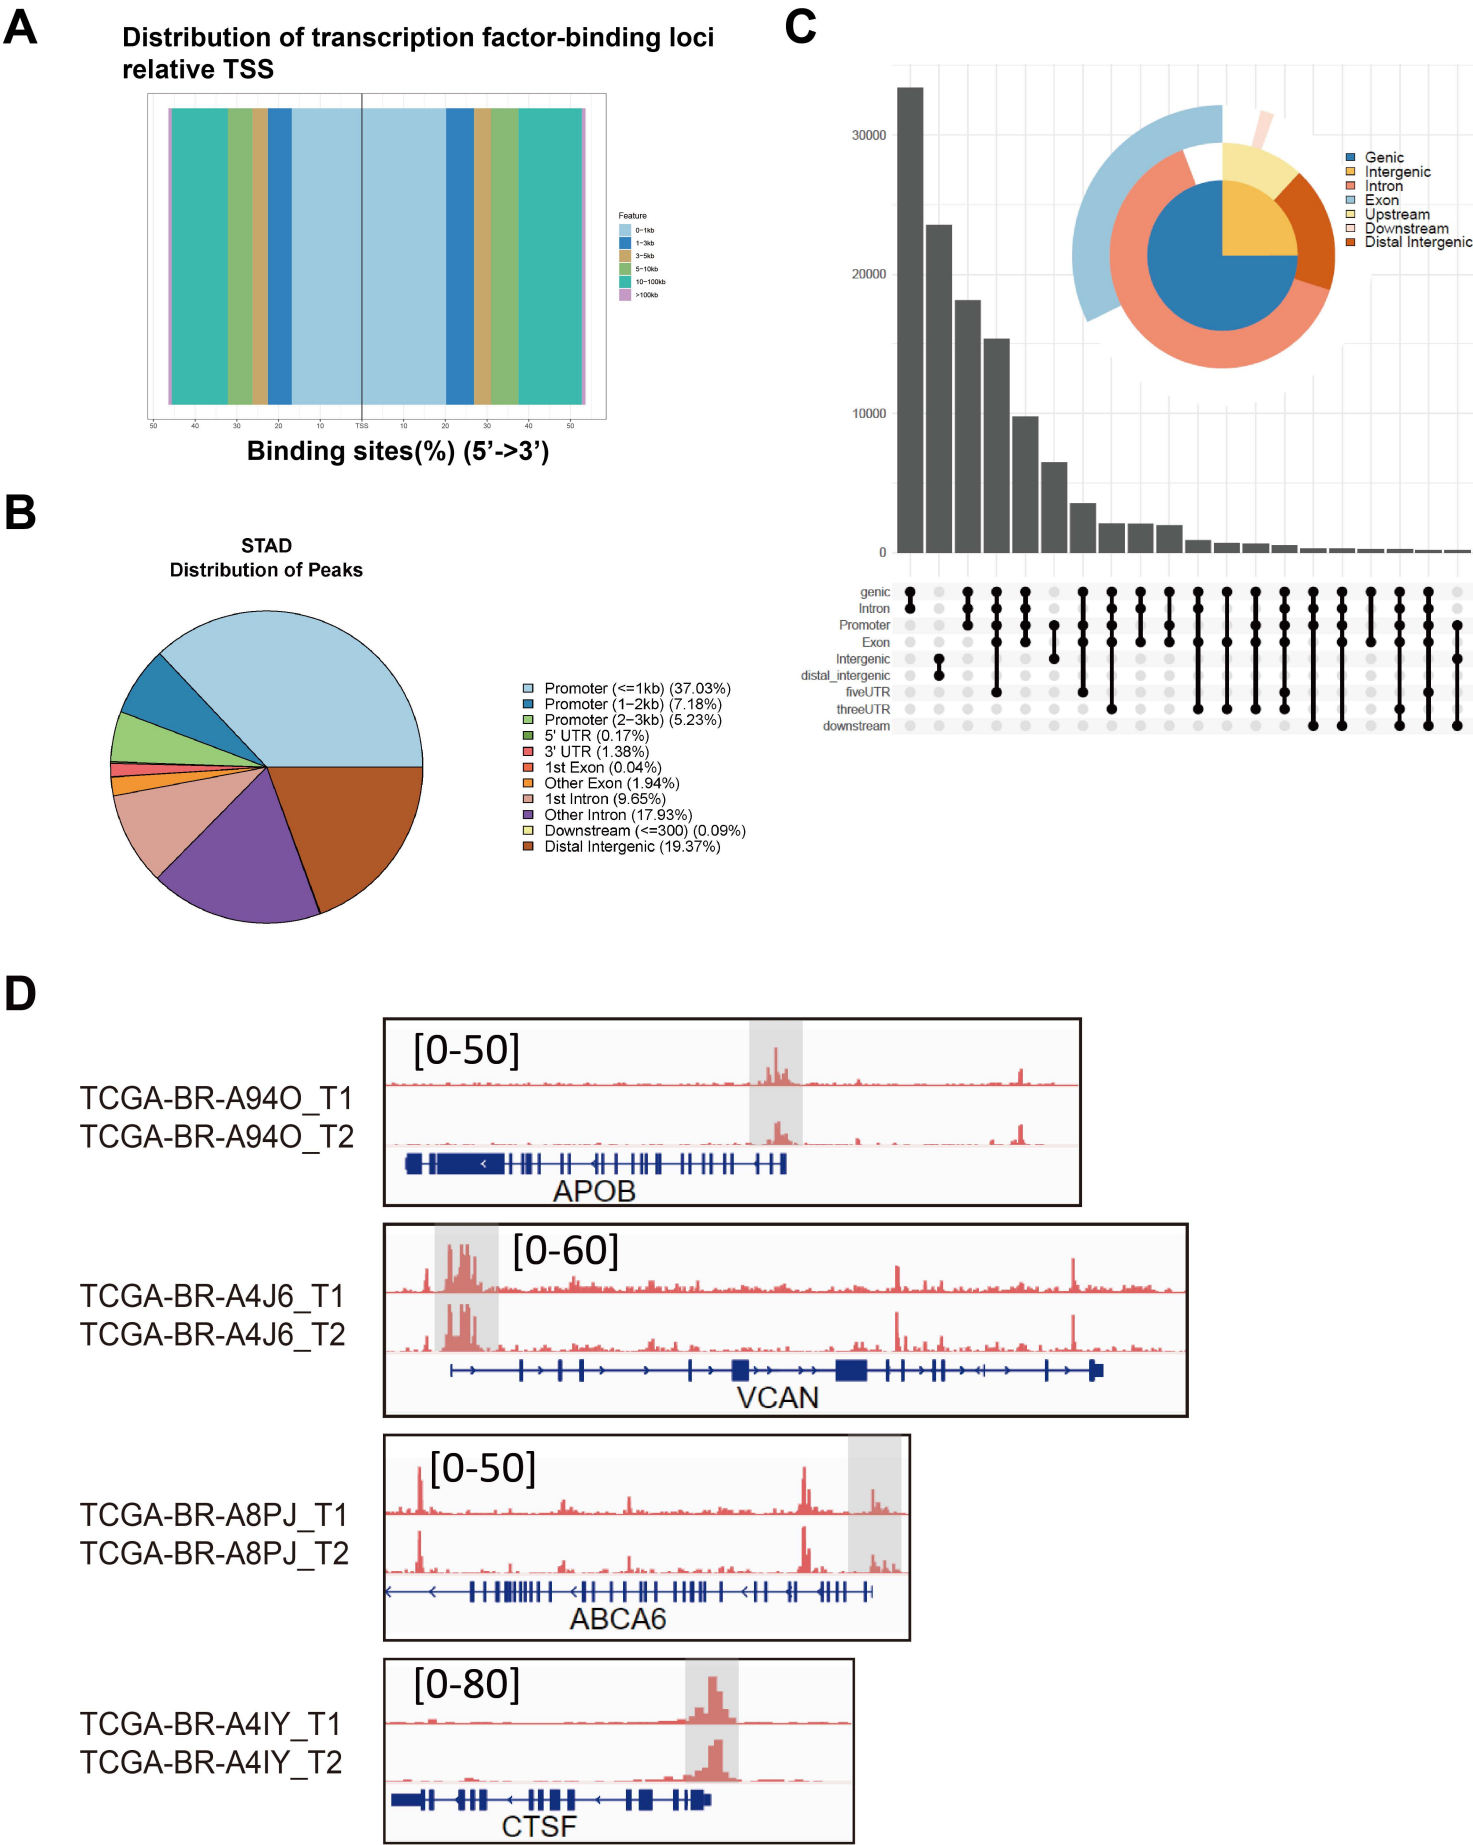



Figure S8

A

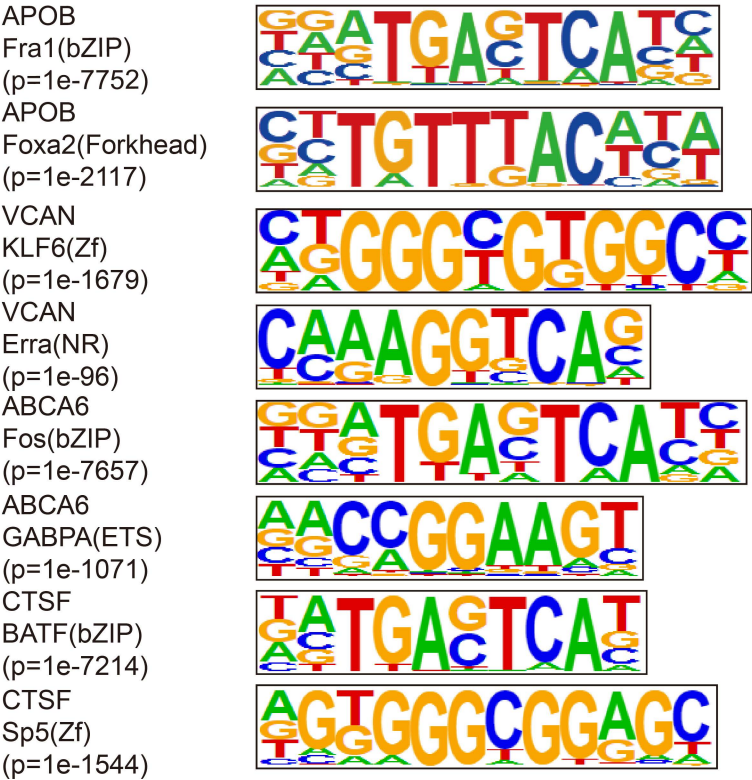

B

Cellular Component

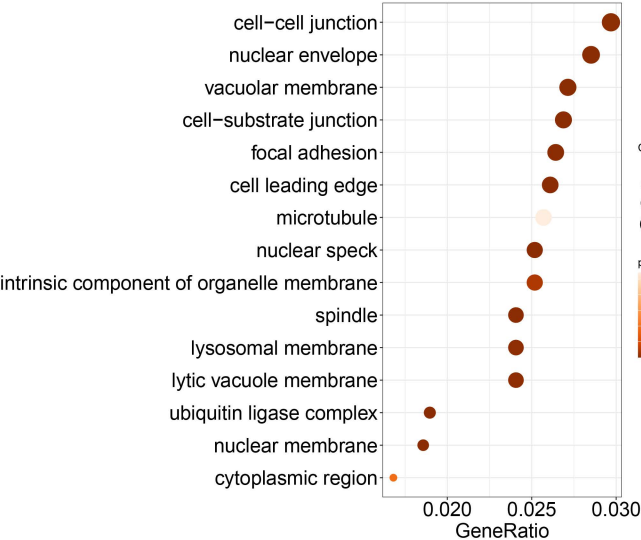

C

Biological process

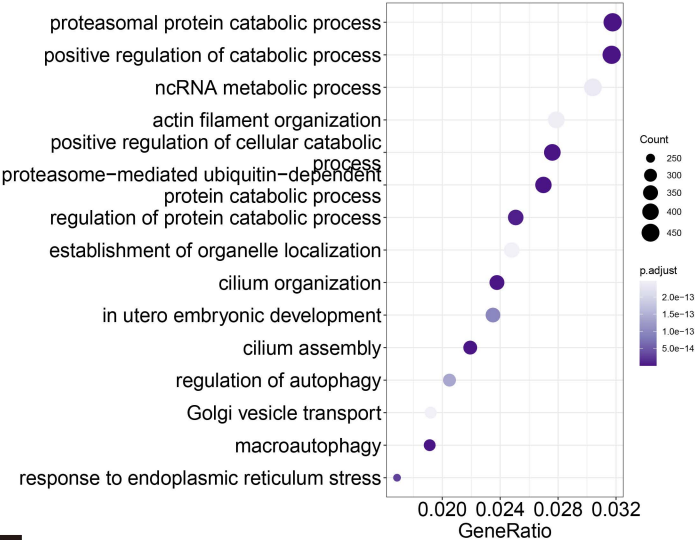

D

Molecular Function

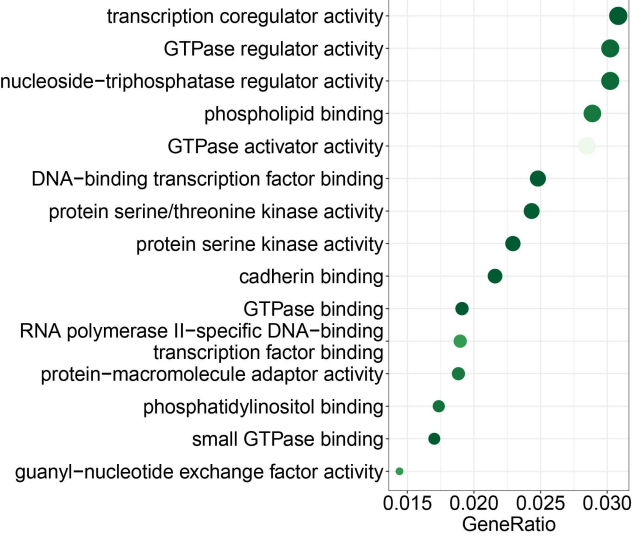

E

KEGG

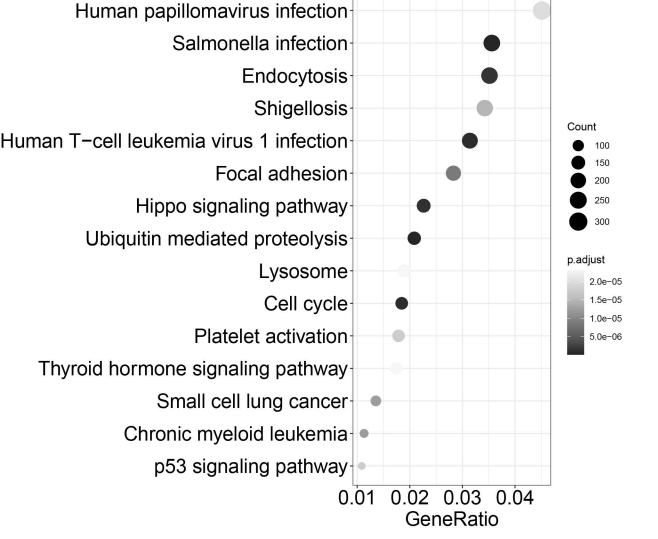

Figure S9

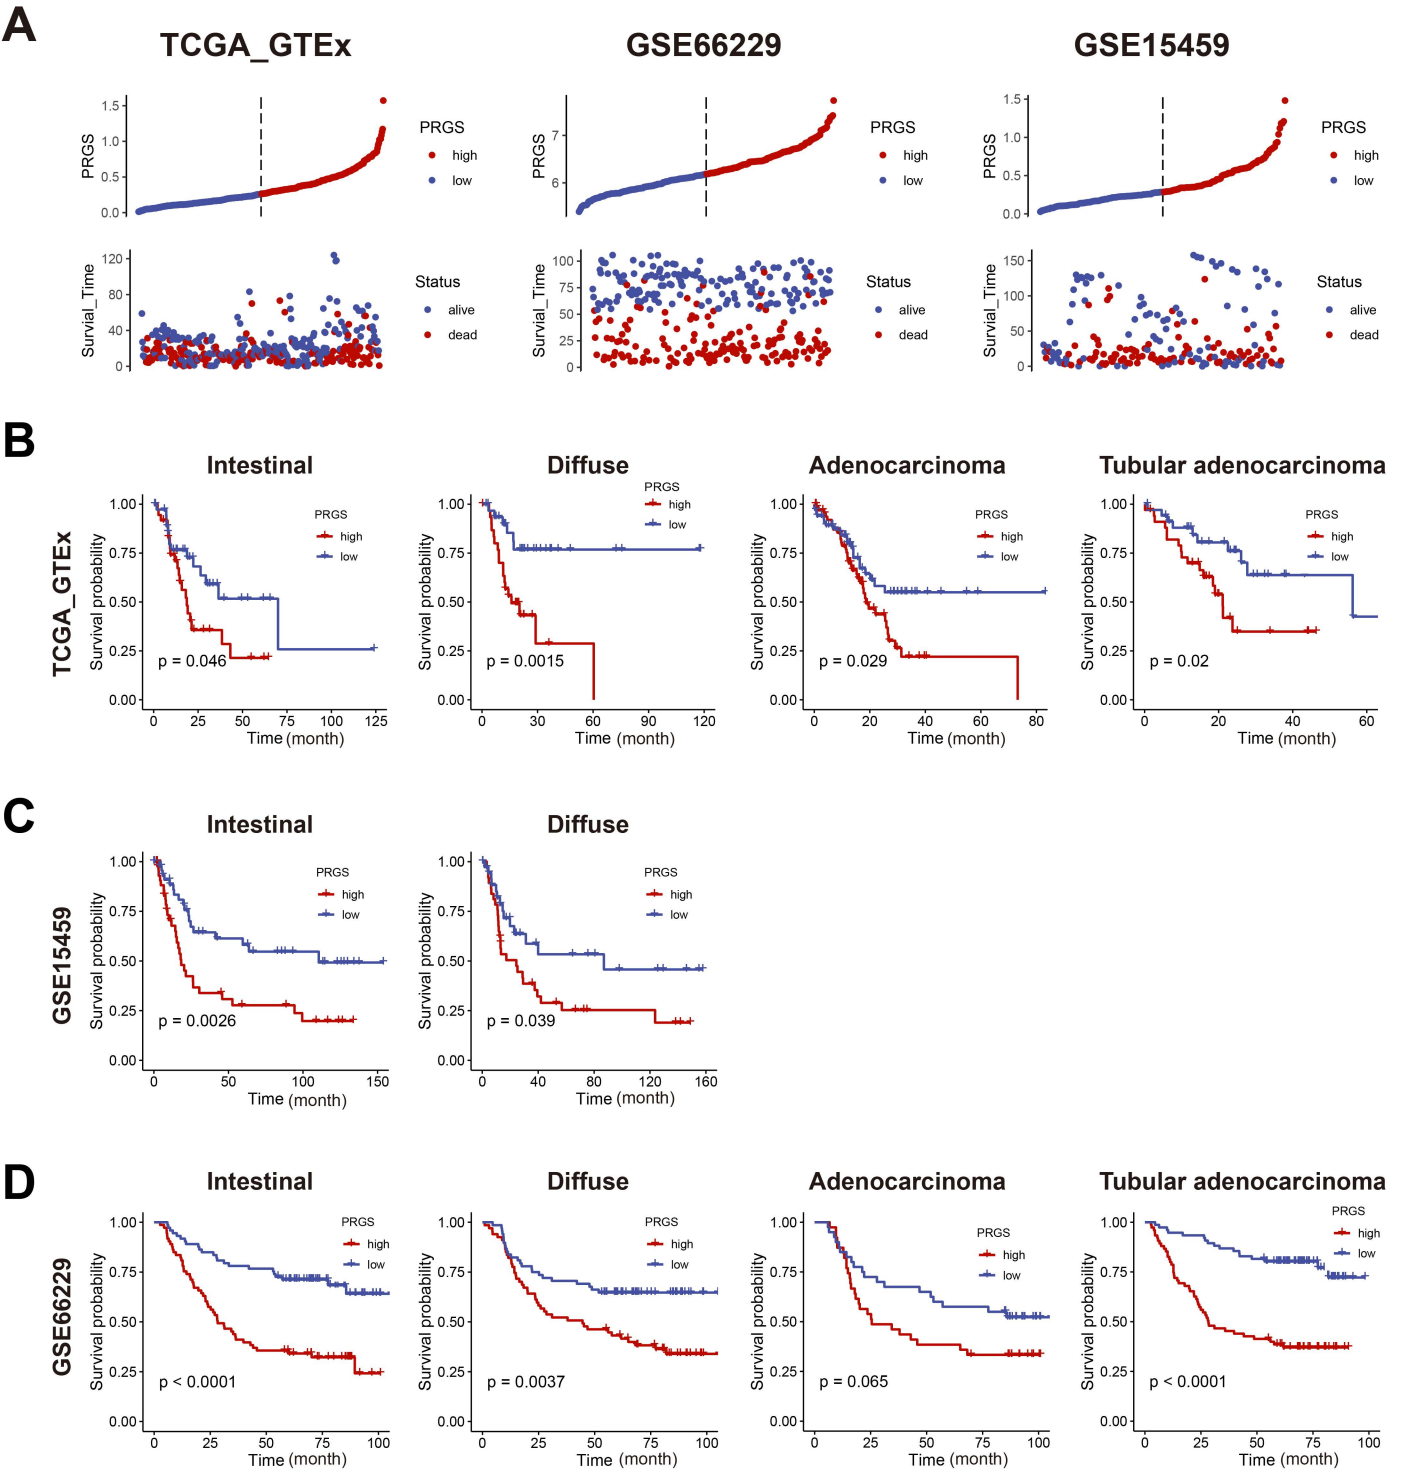

Figure S10

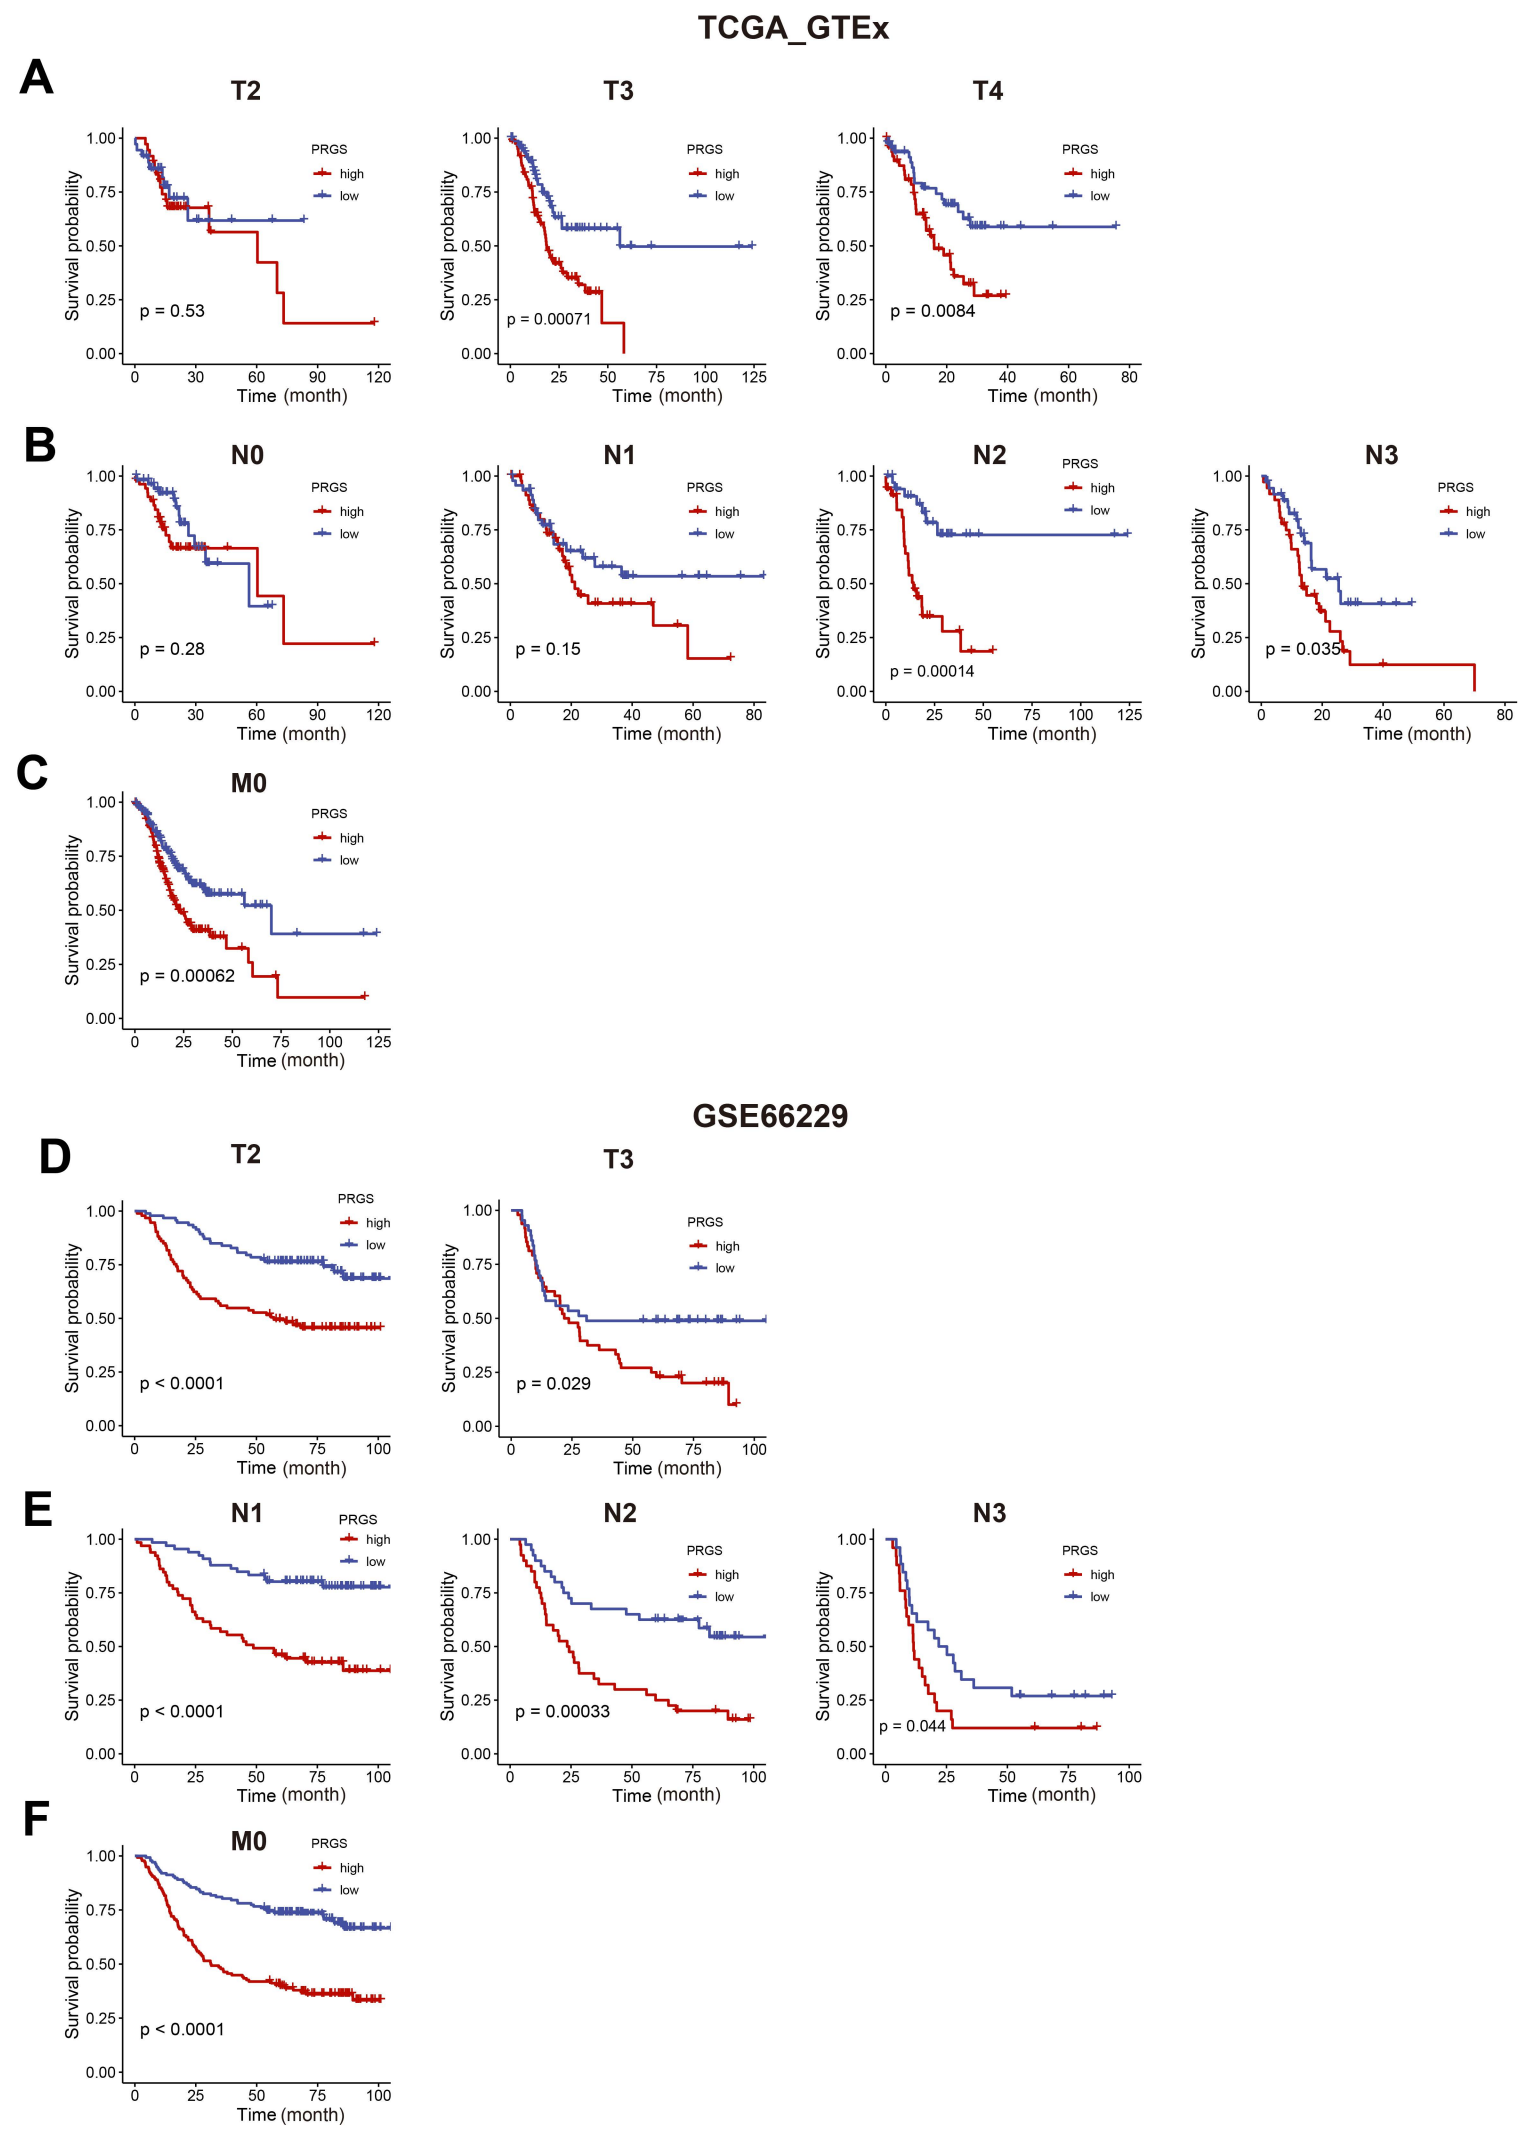



Figure S11

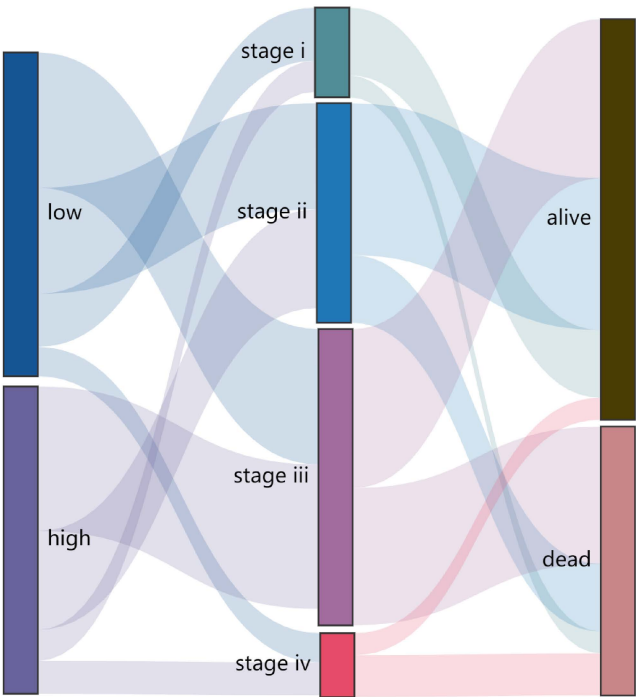

Figure S12

A

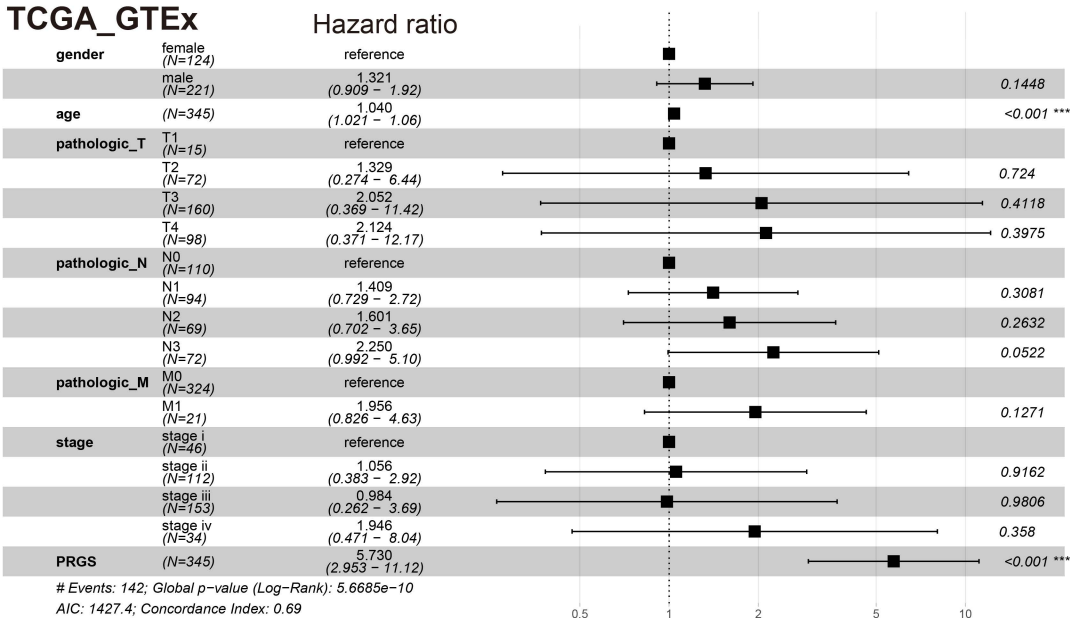

B

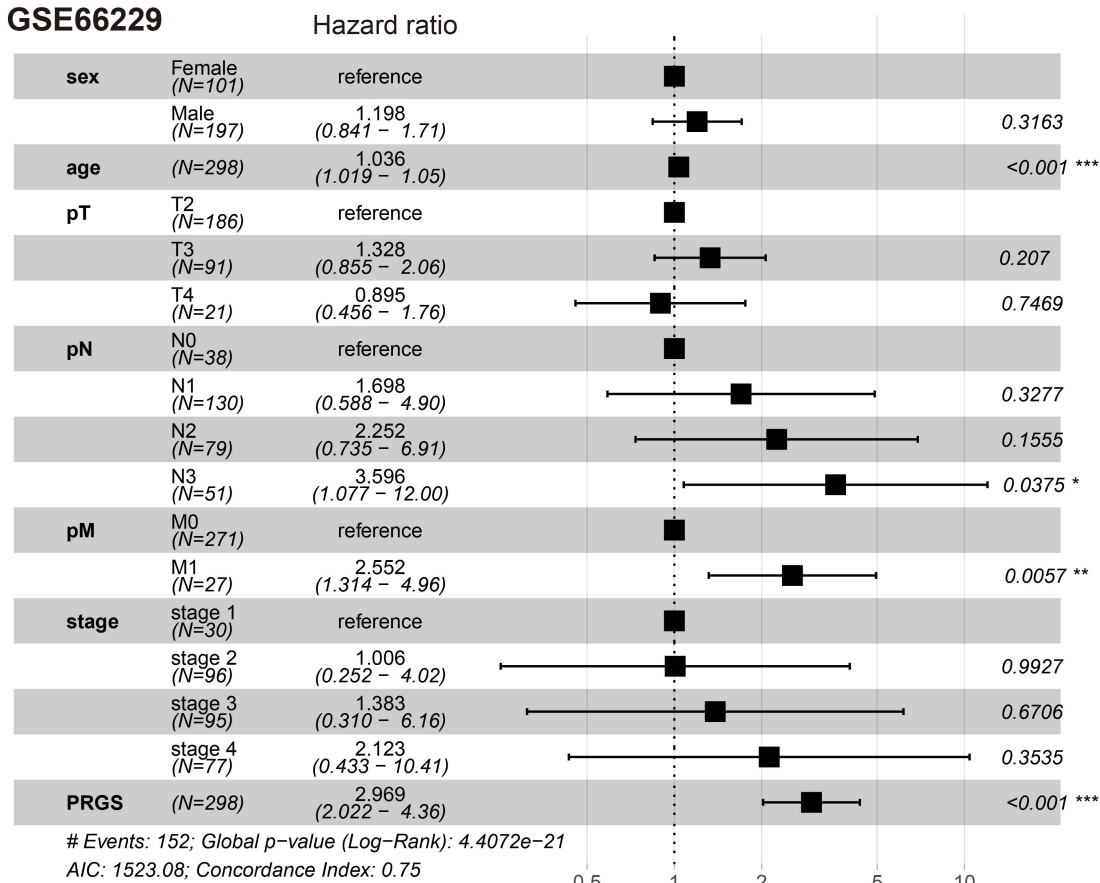

C

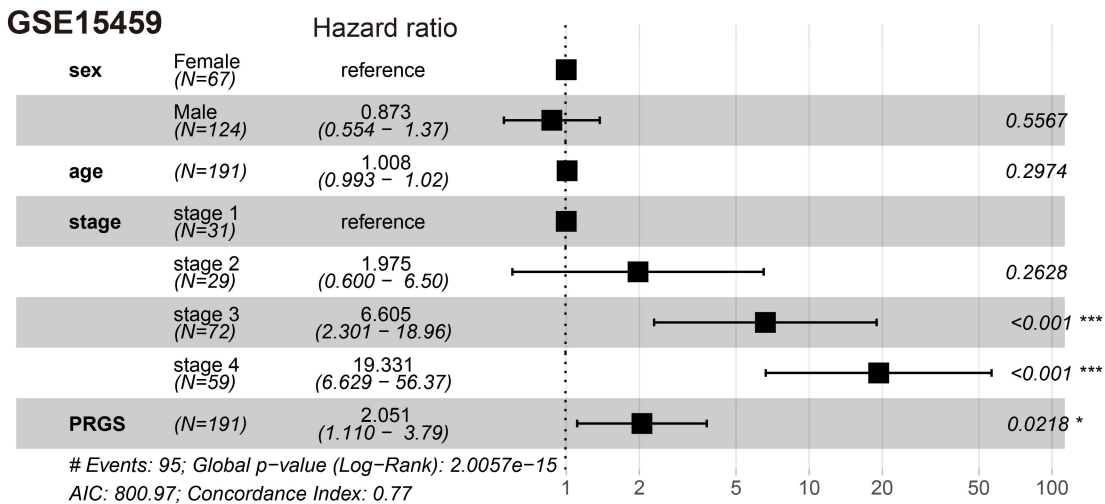

Figure S13

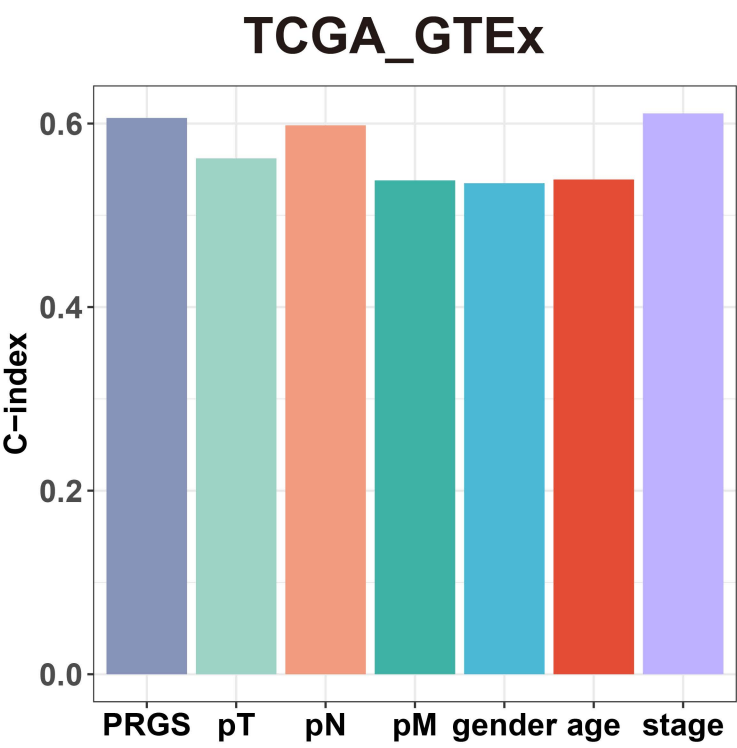



Figure S14

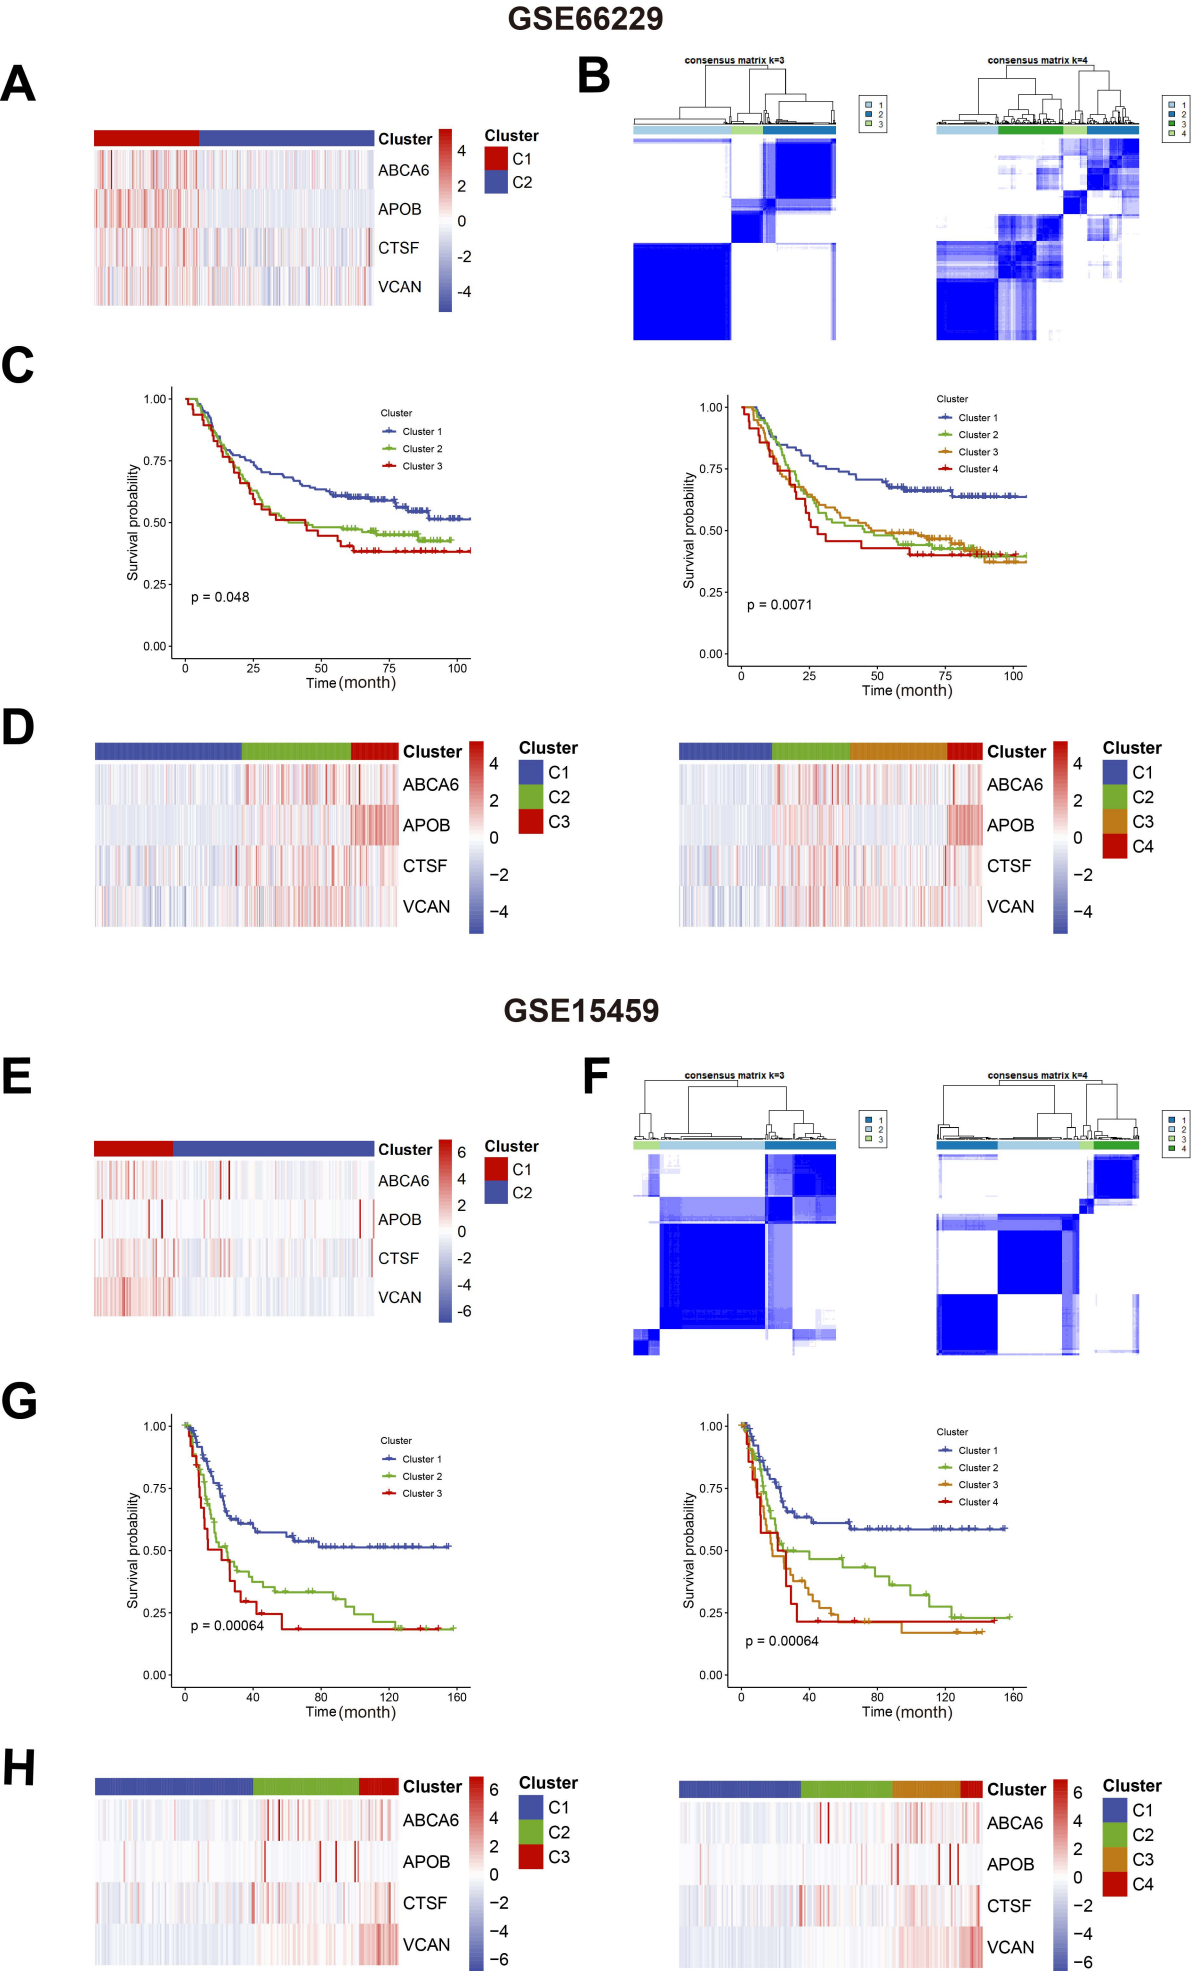

Figure S15

**A****LogisticRegressionClassifier**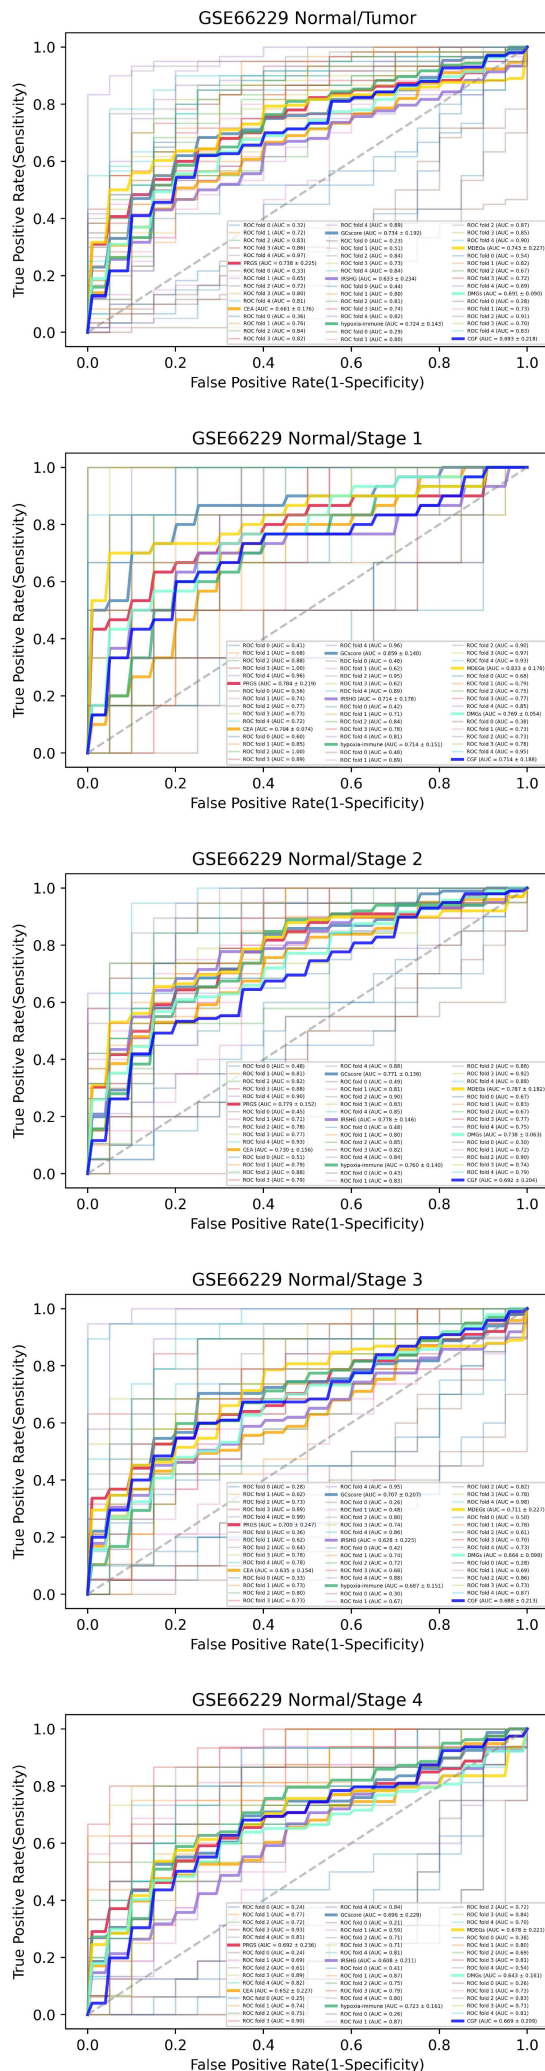**B****RandomForestClassifier**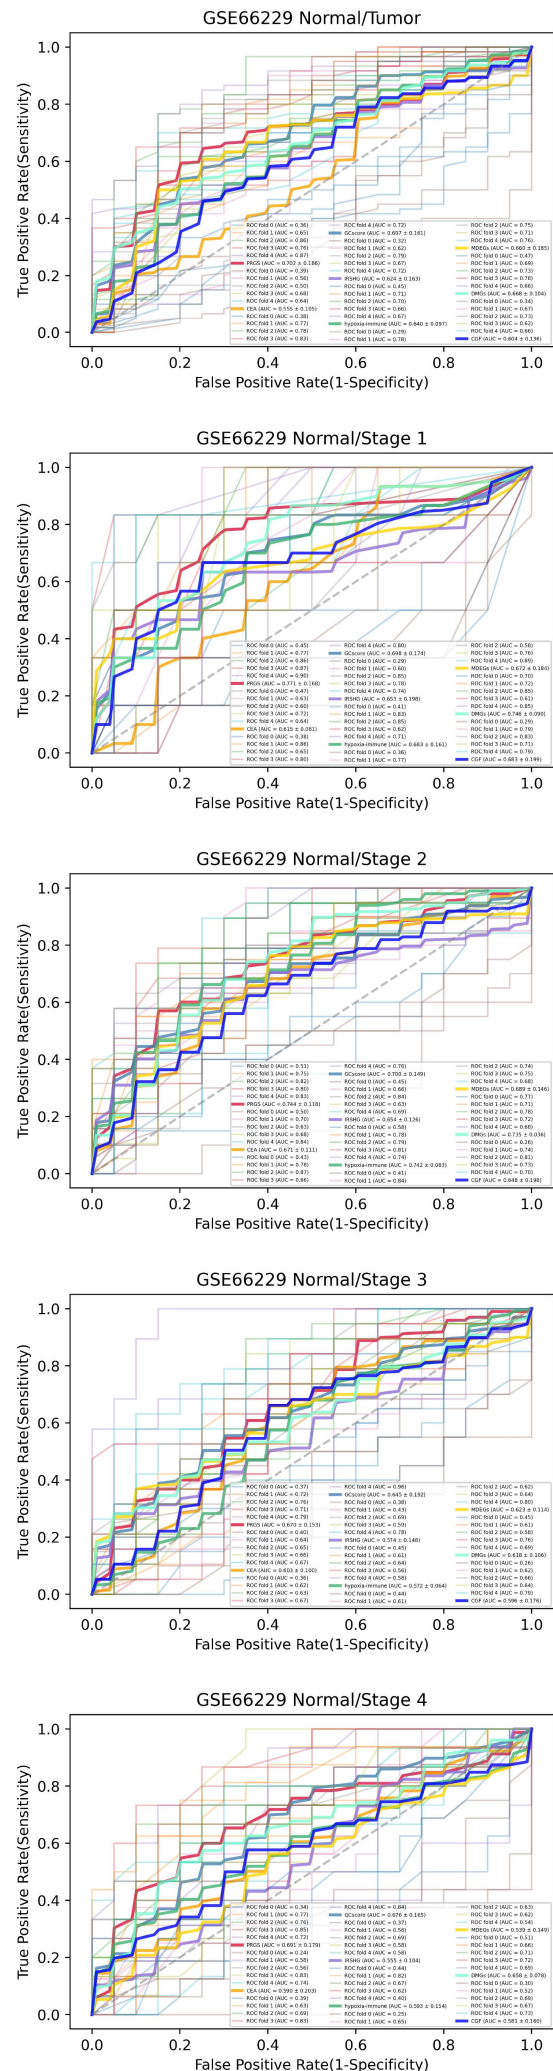

Figure S16

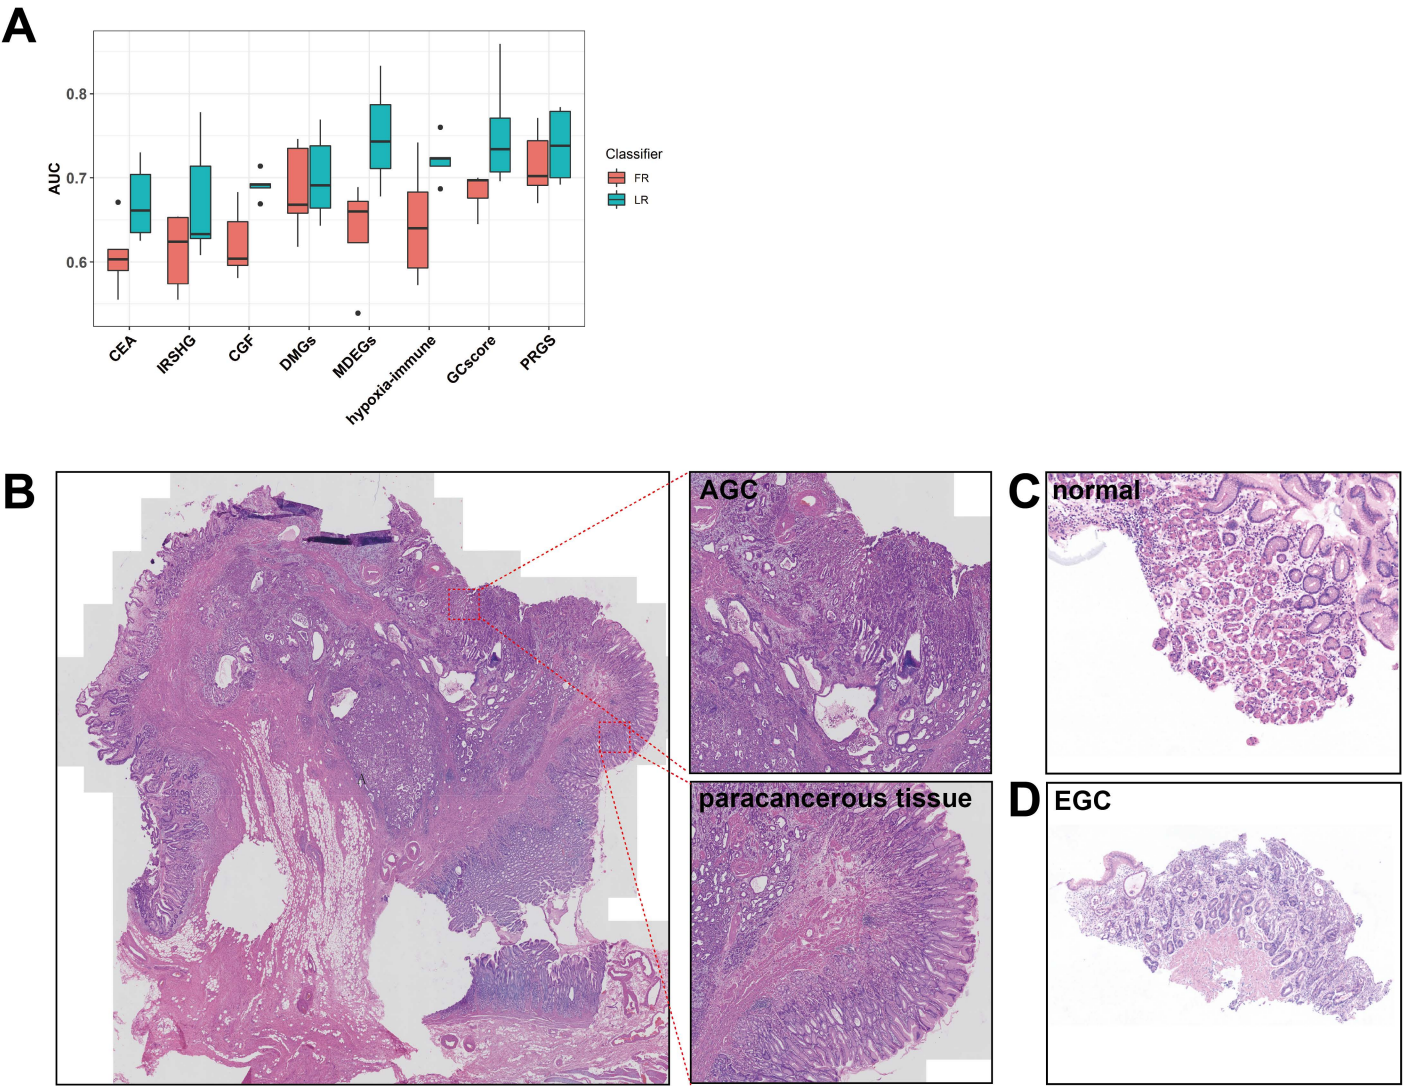



Figure S17

A

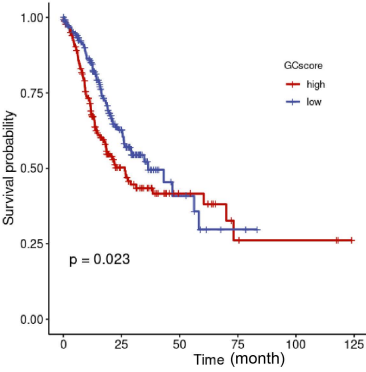

B

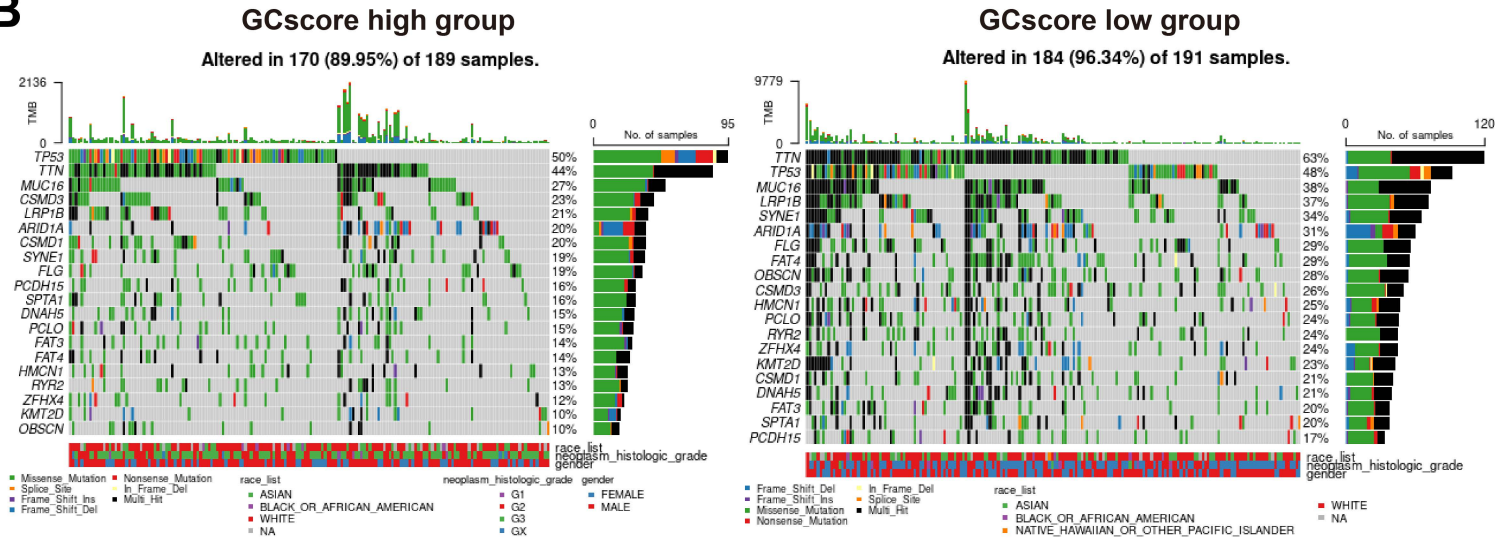

C

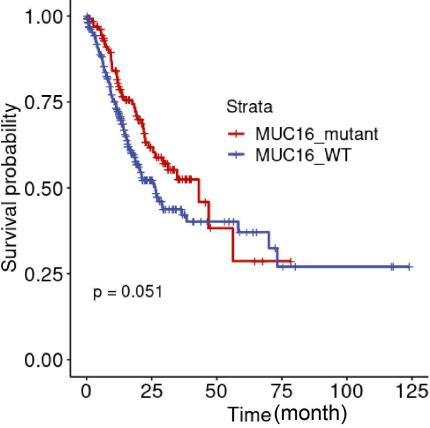

D

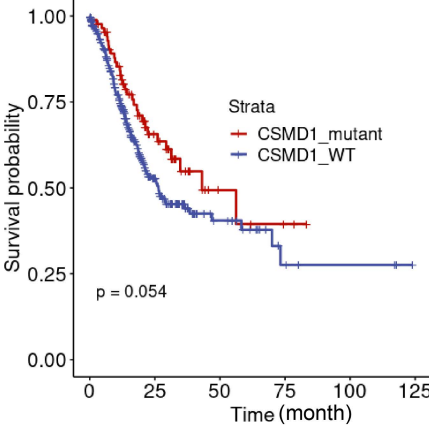

E

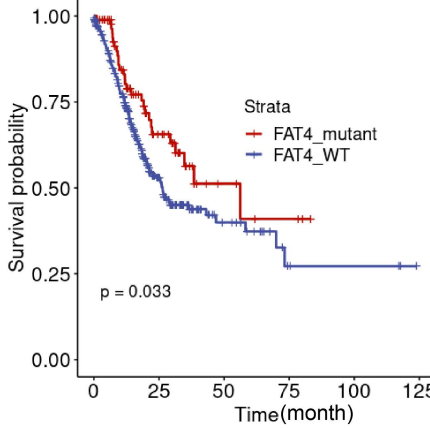

F

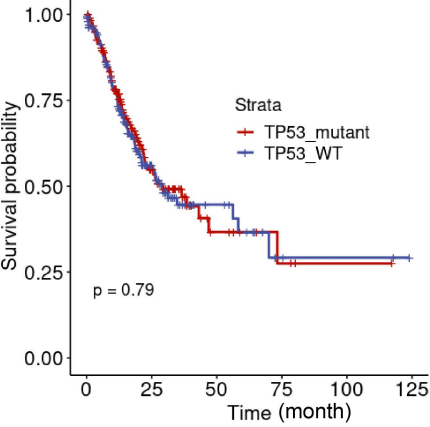

G

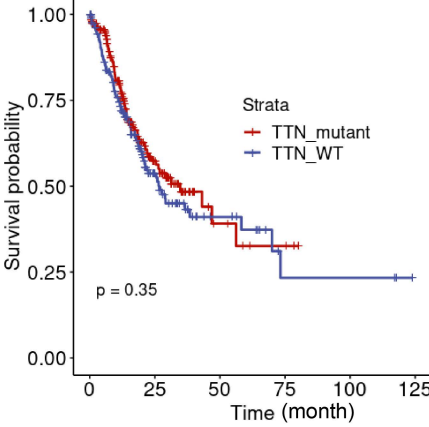

Figure S18

A

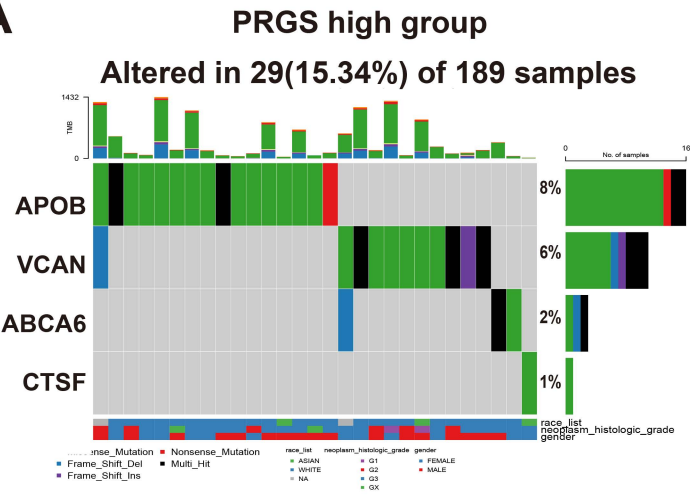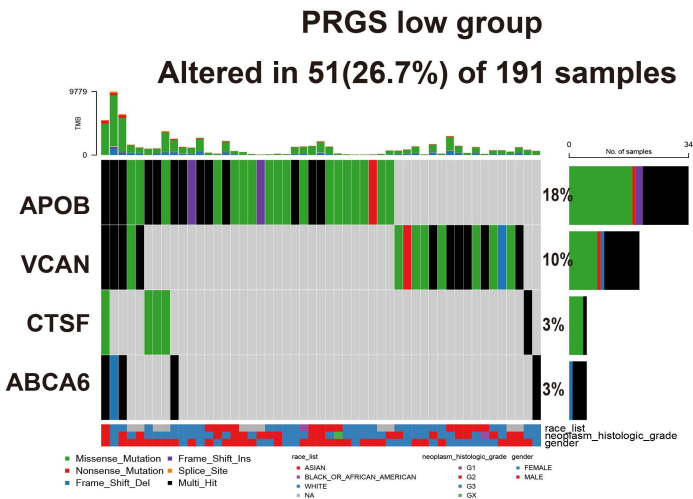

B

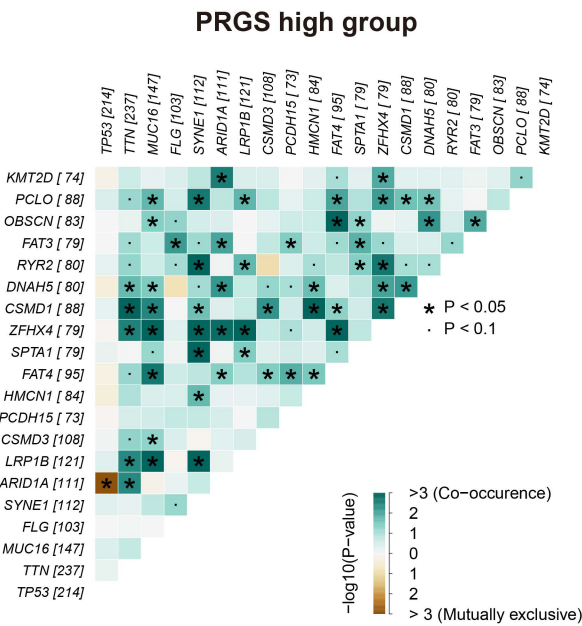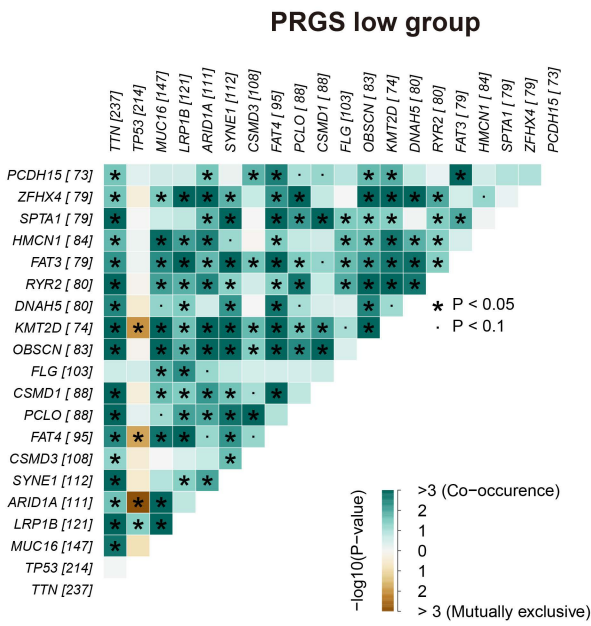

C

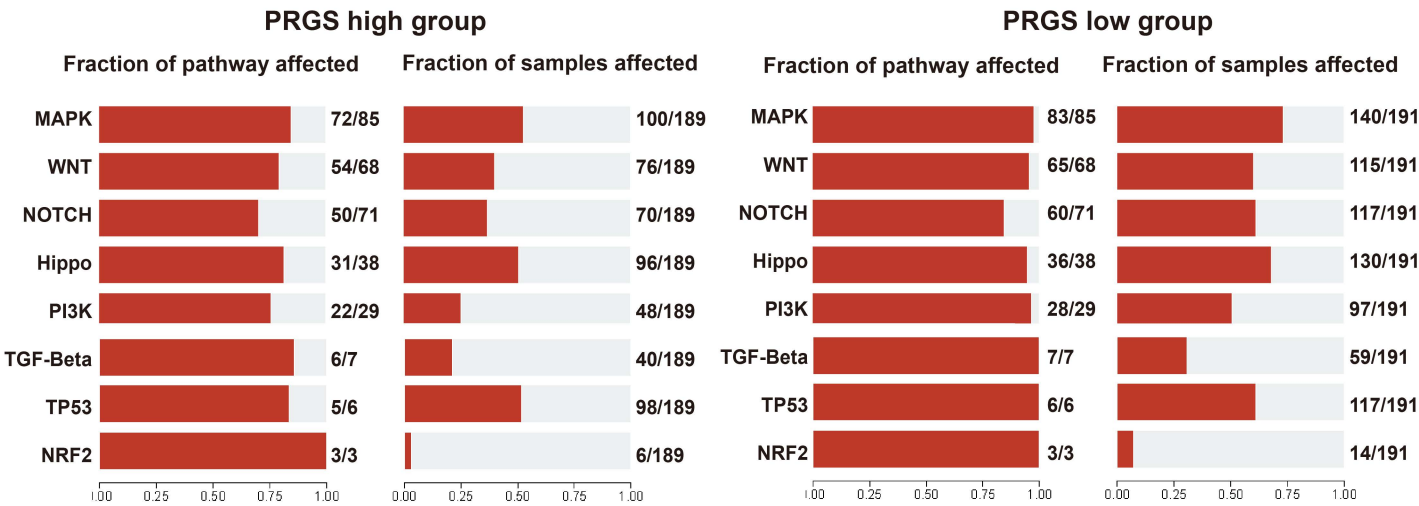

D

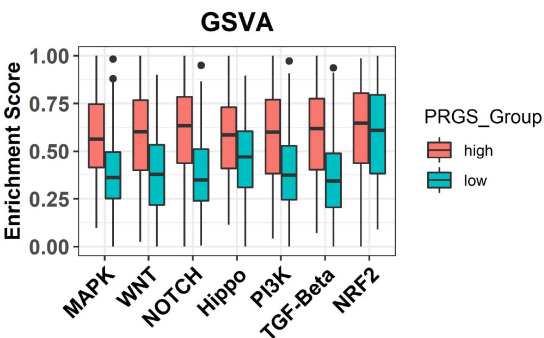

Supplement: s1 [file s1]
