# Supplementary material for: Development and Experimental Validation of a Novel Prognostic Signature for Gastric Cancer
Source: Cancers (Basel). 2023 Mar 5;15(5):1610. doi: 10.3390/cancers15051610 (PMC10000504; doi:10.3390/cancers15051610)
Supplement: Supplementary file 1 [file cancers-15-01610-s001.zip › Supplementary Data.xlsx]

## Sheet: S1
Supplementary Table S1. Details of baseline information in TCGA target GTEx
submitter_id.samples	age_at_initial_pathologic_diagnosis	pathologic_M	pathologic_N	pathologic_T	gender.demographic	vital_status.demographic	tissue_or_organ_of_origin.diagnoses	tumor_stage.diagnoses	sample_type.samples	OS_MONTHS
TCGA_3M_AB46_01A	70	MX	N0	T2b	male	Alive	Lesser curvature of stomach, NOS	stage ib	Primary Tumor	not reported
TCGA_B7_5816_01A	51	M0	N0	T4a	female	Alive	Body of stomach	stage iib	Primary Tumor	812
TCGA_B7_5818_01A	62	M0	N0	T2	male	Alive	Body of stomach	stage ib	Primary Tumor	356
TCGA_B7_A5TI_01A	52	M0	N3	T4	male	Alive	Fundus of stomach	stage iiic	Primary Tumor	595
TCGA_B7_A5TJ_01A	74	M0	NX	T4a	male	Alive	Fundus of stomach	stage iib	Primary Tumor	not reported
TCGA_B7_A5TK_01A	51	M0		T4	male	Alive	Fundus of stomach	stage iiia	Primary Tumor	not reported
TCGA_B7_A5TN_01A	60	M0	NX	T4a	male	Alive	Fundus of stomach	stage iib	Primary Tumor	not reported
TCGA_BR_4187_01A	56	M0	NX	TX	male	Dead	Gastric antrum	not reported	Primary Tumor	not reported
TCGA_BR_4191_01A	72	M0	N1	TX	male	Dead	Stomach, NOS	not reported	Primary Tumor	not reported
TCGA_BR_4201_01A	66	M0	NX	T2a	female	Dead	Cardia, NOS	not reported	Primary Tumor	not reported
TCGA_BR_4253_01A	80	M0	N1	T3	female	Dead	Body of stomach	stage iiia	Primary Tumor	124
TCGA_BR_4255_01A	76	M0	N1	T3	female	Dead	Stomach, NOS	stage iiia	Primary Tumor	124
TCGA_BR_4256_01A	80	M0	N1	TX	male	Dead	Gastric antrum	not reported	Primary Tumor	not reported
TCGA_BR_4257_01A	79	M0	NX	TX	female	Dead	Gastric antrum	not reported	Primary Tumor	not reported
TCGA_BR_4267_01A	51	M0	N0	T2a	male	Dead	Body of stomach	stage ib	Primary Tumor	188
TCGA_BR_4279_01A	43	M0	N1	T2a	male	Dead	Stomach, NOS	stage ii	Primary Tumor	291
TCGA_BR_4280_01A	78	M0	N1	T2b	female	Dead	Stomach, NOS	stage iii	Primary Tumor	201
TCGA_BR_4292_01A	73	M0	NX	T1	female	Alive	Body of stomach	not reported	Primary Tumor	not reported
TCGA_BR_4294_01A	65	M0	NX	T2a	male	Alive	Body of stomach	not reported	Primary Tumor	not reported
TCGA_BR_4357_01A	58	MX	NX	T3	male	Alive	Body of stomach	not reported	Primary Tumor	not reported
TCGA_BR_4361_01A	66	M0	N0	T4	female	Alive	Stomach, NOS	stage iiia	Primary Tumor	not reported
TCGA_BR_4362_01A	74	M0	N1	TX	female	Alive	Stomach, NOS	not reported	Primary Tumor	not reported
TCGA_BR_4363_01A	60	MX	NX	T3	female	Alive	Body of stomach	not reported	Primary Tumor	not reported
TCGA_BR_4366_01A	87	M0	NX	TX	male	Alive	Gastric antrum	not reported	Primary Tumor	not reported
TCGA_BR_4367_01A	78	M0	N1	TX	male	Alive	Gastric antrum	not reported	Primary Tumor	not reported
TCGA_BR_4368_01A	78	M0	N2	T4	female	Alive	Gastric antrum	stage iv	Primary Tumor	not reported
TCGA_BR_4369_01A	75	M0	NX	TX	male	Alive	Cardia, NOS	not reported	Primary Tumor	not reported
TCGA_BR_4370_01A	74	M0	NX	TX	female	Alive	Gastric antrum	not reported	Primary Tumor	not reported
TCGA_BR_4371_01A	71	M0	NX	T2	female	Alive	Body of stomach	not reported	Primary Tumor	not reported
TCGA_BR_6452_01A	78	M0	N0	T3	female	Alive	Body of stomach	stage iia	Primary Tumor	1055
TCGA_BR_6453_01A	54	M0	N1	T2	male	Alive	Body of stomach	stage iia	Primary Tumor	485
TCGA_BR_6454_01A	58	M0	N0	T3	male	Alive	Cardia, NOS	stage iia	Primary Tumor	not reported
TCGA_BR_6455_01A	59	M0	N1	T3	male	Dead	Body of stomach	stage iib	Primary Tumor	422
TCGA_BR_6456_01A	74	M0	N1	T3	female	Dead	Body of stomach	stage iib	Primary Tumor	526
TCGA_BR_6457_01A	69	M0	N0	T3	male	Alive	Body of stomach	stage iia	Primary Tumor	416
TCGA_BR_6458_01A	57	M0	N1	T3	female	Dead	Body of stomach	stage iib	Primary Tumor	588
TCGA_BR_6563_01A	60	M0	N1	T3	male	Alive	Gastric antrum	stage iib	Primary Tumor	1190
TCGA_BR_6564_01A	46	M0	N2	T3	female	Dead	Body of stomach	stage iiia	Primary Tumor	794
TCGA_BR_6565_01A	67	M0	N0	T4a	male	Dead	Body of stomach	stage iib	Primary Tumor	279
TCGA_BR_6566_01A	64	M0	N0	T3	female	Alive	Body of stomach	stage iia	Primary Tumor	997
TCGA_BR_6705_01A	68	M0	N3a	T3	female	Dead	Body of stomach	stage iiib	Primary Tumor	779
TCGA_BR_6706_01A	63	M0	N1	T3	male	Dead	Cardia, NOS	stage iiia	Primary Tumor	549
TCGA_BR_6707_01A	75	M0	N0	T3	male	Dead	Body of stomach	stage iia	Primary Tumor	605
TCGA_BR_6709_01A	57	M0	N3a	T3	female	Dead	Cardia, NOS	stage iiib	Primary Tumor	370
TCGA_BR_6710_01A	41	M0	N0	T2	male	Alive	Cardia, NOS	stage ib	Primary Tumor	273
TCGA_BR_6801_01A	70	M0	N0	T3	male	Alive	Body of stomach	stage iia	Primary Tumor	1223
TCGA_BR_6802_01A	65	M0	N2	T3	male	Alive	Body of stomach	stage iiia	Primary Tumor	940
TCGA_BR_6803_01A	54	M0	N0	T3	female	Alive	Body of stomach	stage iia	Primary Tumor	949
TCGA_BR_6852_01A	64	M0	N0	T3	female	Alive	Cardia, NOS	stage iia	Primary Tumor	1367
TCGA_BR_7196_01A	64	M1	N3a	T3	male	Alive	Cardia, NOS	stage iv	Primary Tumor	not reported
TCGA_BR_7197_01A	69	M0	N0	T3	male	Alive	Gastric antrum	stage ii	Primary Tumor	280
TCGA_BR_7703_01A	81	M0	N0	T1b	male	Alive	Body of stomach	stage ia	Primary Tumor	1100
TCGA_BR_7704_01A	69	M0	N0	T3	female	Alive	Body of stomach	stage ii	Primary Tumor	1072
TCGA_BR_7707_01A	69	M0	N0	T2	female	Alive	Body of stomach	stage ib	Primary Tumor	1090
TCGA_BR_7715_01A	65	M0	N0	T3	male	Alive	Body of stomach	stage iia	Primary Tumor	1023
TCGA_BR_7716_01A	62	M0	N1	T3	female	Alive	Body of stomach	stage iib	Primary Tumor	1210
TCGA_BR_7717_01A	63	M0	N1	T4	male	Dead	Cardia, NOS	stage iv	Primary Tumor	552
TCGA_BR_7722_01A	62	M0	N1	T3	male	Dead	Cardia, NOS	stage iib	Primary Tumor	466
TCGA_BR_7723_01A	59	M0	N3a	T3	male	Dead	Body of stomach	stage iiib	Primary Tumor	874
TCGA_BR_7851_01A	74	M0	N0	T4a	male	Dead	Body of stomach	stage iib	Primary Tumor	574
TCGA_BR_7901_01A	74	M0	N1	T3	male	Dead	Cardia, NOS	stage iib	Primary Tumor	105
TCGA_BR_7957_01A	50	M1	N3a	T3	female	Dead	Body of stomach	stage iv	Primary Tumor	276
TCGA_BR_7958_01A	60	M0	N0	T4b	male	Alive	Body of stomach	stage iiib	Primary Tumor	899
TCGA_BR_7959_01A	59	M0	N1	T4a	male	Alive	Cardia, NOS	stage iiia	Primary Tumor	1010
TCGA_BR_8058_01A	53	M0	N2	T4a	female	Alive	Gastric antrum	stage iiib	Primary Tumor	1133
TCGA_BR_8059_01A	72	M0	N1	T4	male	Dead	Fundus of stomach	stage iii	Primary Tumor	439
TCGA_BR_8060_01A	75	M0	N2	T2	female	Dead	Cardia, NOS	stage iib	Primary Tumor	348
TCGA_BR_8077_01A	58	M0	N1	T4b	female	Alive	Body of stomach	stage iiib	Primary Tumor	21
TCGA_BR_8078_01A	70	M0	N0	T4a	female	Alive	Body of stomach	stage iib	Primary Tumor	900
TCGA_BR_8080_01A	72	M0	N3a	T4	female	Dead	Body of stomach	stage iiic	Primary Tumor	292
TCGA_BR_8081_01A	71	M0	N0	T4a	female	Alive	Body of stomach	stage iib	Primary Tumor	981
TCGA_BR_8284_01A	72	M0	N3a	T4a	female	Dead	Gastric antrum	stage iiic	Primary Tumor	245
TCGA_BR_8286_01A	49	M0	N0	T3	male	Alive	Gastric antrum	stage ii	Primary Tumor	895
TCGA_BR_8289_01A	57	M1	N3a	T4	male	Dead	Body of stomach	stage iv	Primary Tumor	81
TCGA_BR_8291_01A	61	M0	N1	T3	male	Dead	Gastric antrum	stage iib	Primary Tumor	607
TCGA_BR_8295_01A	60	M0	N0	T4a	female	Dead	Body of stomach	stage iib	Primary Tumor	67
TCGA_BR_8296_01A	58	M0	N2	T4b	female	Dead	Body of stomach	stage iiic	Primary Tumor	474
TCGA_BR_8297_01A	58	M0	N3a	T4b	male	Alive	Body of stomach	stage iiic	Primary Tumor	225
TCGA_BR_8361_01A	71	M0	N2	T4b	female	Alive	Fundus of stomach	stage iiic	Primary Tumor	946
TCGA_BR_8362_01A	65	M0	N3a	T4b	male	Dead	Fundus of stomach	stage iiic	Primary Tumor	398
TCGA_BR_8363_01A	73	M0	N0	T2	female	Dead	Gastric antrum	stage ib	Primary Tumor	8
TCGA_BR_8364_01A	42	M0	N2	T4b	female	Alive	Fundus of stomach	stage iiic	Primary Tumor	675
TCGA_BR_8365_01A	70	M0	N0	T3	female	Dead	Fundus of stomach	stage iia	Primary Tumor	533
TCGA_BR_8366_01A	80	M0	N0	T3	female	Alive	Fundus of stomach	stage iia	Primary Tumor	29
TCGA_BR_8367_01A	55	M0	N3a	T3	male	Dead	Fundus of stomach	stage iiib	Primary Tumor	801
TCGA_BR_8368_01A	84	M0	N0	T2	female	Alive	Fundus of stomach	stage ib	Primary Tumor	131
TCGA_BR_8369_01A	76	M0	N3a	T3	female	Alive	Gastric antrum	stage iiib	Primary Tumor	427
TCGA_BR_8371_01A	62	M0	N3a	T3	male	Dead	Cardia, NOS	stage iiib	Primary Tumor	359
TCGA_BR_8372_01A	63	M0	N3a	T4b	male	Alive	Fundus of stomach	stage iiic	Primary Tumor	951
TCGA_BR_8373_01A	65	M0	N1	T4a	female	Alive	Fundus of stomach	stage iiia	Primary Tumor	450
TCGA_BR_8380_01A	55	M0	N3a	T4a	male	Dead	Gastric antrum	stage iiic	Primary Tumor	21
TCGA_BR_8381_01A	51	M0	N1	T3	male	Alive	Fundus of stomach	stage iib	Primary Tumor	224
TCGA_BR_8382_01A	67	M0	N3a	T4b	female	Dead	Gastric antrum	stage iiic	Primary Tumor	762
TCGA_BR_8384_01A	69	M0	N2	T4b	male	Alive	Gastric antrum	stage iiic	Primary Tumor	113
TCGA_BR_8483_01A	59	M0	N2	T3	male	Alive	Gastric antrum	stage iiia	Primary Tumor	164
TCGA_BR_8484_01A	61	M0	N1	T4a	male	Dead	Fundus of stomach	stage iiia	Primary Tumor	766
TCGA_BR_8485_01A	68	M0	N3a	T4	female	Alive	Fundus of stomach	stage iiic	Primary Tumor	280
TCGA_BR_8486_01A	90	M0	N0	T1b	female	Alive	Fundus of stomach	stage ia	Primary Tumor	not reported
TCGA_BR_8487_01A	64	M0	N0	T3	female	Alive	Gastric antrum	stage iia	Primary Tumor	34
TCGA_BR_8588_01A	55	M0	N0	T4a	female	Alive	Fundus of stomach	stage iib	Primary Tumor	389
TCGA_BR_8589_01A	56	M0	N1	T4b	male	Alive	Fundus of stomach	stage iiib	Primary Tumor	825
TCGA_BR_8590_01A	62	M0	N2	T4b	male	Dead	Fundus of stomach	stage iiic	Primary Tumor	284
TCGA_BR_8591_01A	79	M0	N3a	T4a	male	Alive	Gastric antrum	stage iiic	Primary Tumor	856
TCGA_BR_8592_01A	63	M0	N1	T4b	female	Dead	Fundus of stomach	stage iiib	Primary Tumor	191
TCGA_BR_8676_01A	59	M0	N3a	T3	male	Alive	Gastric antrum	stage iiib	Primary Tumor	229
TCGA_BR_8677_01A	74	M0	N3a	T3	female	Alive	Gastric antrum	stage iiib	Primary Tumor	813
TCGA_BR_8678_01A	76	M0	N0	T2	male	Alive	Fundus of stomach	stage ib	Primary Tumor	754
TCGA_BR_8679_01A	63	M0	N0	T2	female	Alive	Fundus of stomach	stage ib	Primary Tumor	not reported
TCGA_BR_8680_01A	45	M1	N2	T4b	male	Alive	Gastric antrum	stage iv	Primary Tumor	972
TCGA_BR_8682_01A	52	M0	N0	T4a	male	Alive	Gastric antrum	stage iib	Primary Tumor	991
TCGA_BR_8683_01A	75	M0	N2	T4a	male	Dead	Gastric antrum	stage iiib	Primary Tumor	300
TCGA_BR_8686_01A	69	M0	N1	T4b	male	Dead	Gastric antrum	stage iiib	Primary Tumor	635
TCGA_BR_8687_01A	67	M0	N2	T4b	female	Dead	Cardia, NOS	stage iiic	Primary Tumor	250
TCGA_BR_8690_01A	54	M0	N3a	T3	female	Alive	Cardia, NOS	stage iiib	Primary Tumor	325
TCGA_BR_A44T_01A	53	M0	N0	T3	female	Alive	Cardia, NOS	stage iia	Primary Tumor	1038
TCGA_BR_A44U_01A	70	M0	N3a	T3	male	Dead	Gastric antrum	stage iiib	Primary Tumor	422
TCGA_BR_A452_01A	57	M0	N1	T4a	male	Dead	Gastric antrum	stage iiia	Primary Tumor	229
TCGA_BR_A453_01A	51	M1	N3a	T4a	male	Dead	Gastric antrum	stage iv	Primary Tumor	185
TCGA_BR_A4CR_01A	70	M0	N3a	T4b	female	Alive	Fundus of stomach	stage iiic	Primary Tumor	not reported
TCGA_BR_A4CS_01A	77	M0	N3a	T4b	male	Dead	Fundus of stomach	stage iiic	Primary Tumor	45
TCGA_BR_A4IU_01A	34	M0	N1	T4a	female	Alive	Gastric antrum	stage iiia	Primary Tumor	838
TCGA_BR_A4IV_01A	47	M0	N2	T4a	male	Dead	Gastric antrum	stage iiib	Primary Tumor	869
TCGA_BR_A4IY_01A	58	M0	N0	T4a	male	Alive	Gastric antrum	stage iib	Primary Tumor	392
TCGA_BR_A4IZ_01A	45	M0	N2	T4a	female	Dead	Gastric antrum	stage iiib	Primary Tumor	273
TCGA_BR_A4J1_01A	63	M0	N1	T4a	male	Dead	Gastric antrum	stage iiia	Primary Tumor	22
TCGA_BR_A4J2_01A	70	M0	N0	T4a	male	Alive	Gastric antrum	stage iib	Primary Tumor	431
TCGA_BR_A4J4_01A	39	M0	N2	T4a	male	Alive	Gastric antrum	stage iiib	Primary Tumor	16
TCGA_BR_A4J5_01A	56	M0	N1	T4a	male	Alive	Gastric antrum	stage iiia	Primary Tumor	862
TCGA_BR_A4J6_01A	69	M0	N0	T3	female	Alive	Cardia, NOS	stage iia	Primary Tumor	20
TCGA_BR_A4J7_01A	49	M0	NX	T4a	male	Alive	Gastric antrum	stage iib	Primary Tumor	not reported
TCGA_BR_A4J8_01A	71	M0	N3a	T3	female	Alive	Cardia, NOS	stage iiib	Primary Tumor	411
TCGA_BR_A4J9_01A	55	M0	N0	T3	male	Alive	Gastric antrum	stage iia	Primary Tumor	14
TCGA_BR_A4PD_01A	72	M0	N0	T4a	female	Alive	Fundus of stomach	stage iib	Primary Tumor	628
TCGA_BR_A4PE_01A	68	M0	N0	T2	female	Alive	Cardia, NOS	stage ib	Primary Tumor	621
TCGA_BR_A4PF_01A	72	M0	N2	T4a	male	Alive	Gastric antrum	stage iiib	Primary Tumor	35
TCGA_BR_A4QI_01A	70	M0	N0	T3	female	Dead	Gastric antrum	stage iia	Primary Tumor	652
TCGA_BR_A4QL_01A	75	M0	N3a	T3	female	Dead	Gastric antrum	stage iiib	Primary Tumor	491
TCGA_BR_A4QM_01A	65	M0	N2	T3	male	Alive	Cardia, NOS	stage iiia	Primary Tumor	156
TCGA_CD_5798_01A	82	M0	N0	T3	male	Alive	Gastric antrum	stage ii	Primary Tumor	408
TCGA_CD_5799_01A	45	M0	N1	T2	male	Alive	Gastric antrum	stage ii	Primary Tumor	396
TCGA_CD_5800_01A	51	M0	N0	T3	female	Alive	Gastric antrum	stage ii	Primary Tumor	400
TCGA_CD_5801_01A	69	M0	N1	T3	male	Dead	Gastric antrum	stage iiia	Primary Tumor	401
TCGA_CD_5803_01A	78	M0	N0	T3	female	Dead	Gastric antrum	stage ii	Primary Tumor	341
TCGA_CD_5804_01A	90	M0	N1	T3	male	Alive	Pylorus	not reported	Primary Tumor	not reported
TCGA_CD_5813_01A	60	M0	N0	T3	male	Dead	Body of stomach	stage ii	Primary Tumor	377
TCGA_CD_8524_01A	61	M0	N0	T3	female	Alive	Gastric antrum	stage ii	Primary Tumor	388
TCGA_CD_8525_01A	82	M0	N1	T3	female	Alive	Gastric antrum	stage iiia	Primary Tumor	383
TCGA_CD_8526_01A	73	M0	N1	T3	female	Alive	Fundus of stomach	stage iiia	Primary Tumor	381
TCGA_CD_8527_01A	72	M0	N1	T2	female	Dead	Gastric antrum	stage ii	Primary Tumor	218
TCGA_CD_8528_01A	43	M0	N0	T4	female	Alive	Gastric antrum	stage iiia	Primary Tumor	375
TCGA_CD_8529_01A	65	M1	N0	T4	male	Alive	Gastric antrum	stage iv	Primary Tumor	374
TCGA_CD_8530_01A	51	M0	N0	T3	male	Alive	Fundus of stomach	stage ii	Primary Tumor	377
TCGA_CD_8531_01A	66	M0	N1	T3	female	Alive	Fundus of stomach	stage iiia	Primary Tumor	383
TCGA_CD_8532_01A	52	M0	N0	T3	male	Dead	Cardia, NOS	stage ii	Primary Tumor	354
TCGA_CD_8533_01A	48	M0	N0	T3	male	Alive	Gastric antrum	stage ii	Primary Tumor	468
TCGA_CD_8534_01A	41	M0	N0	T3	male	Alive	Gastric antrum	stage ii	Primary Tumor	367
TCGA_CD_8535_01A	59	M0	N1	T3	male	Alive	Fundus of stomach	stage iiia	Primary Tumor	390
TCGA_CD_8536_01A	74	M0	N0	T3	male	Alive	Fundus of stomach	stage ii	Primary Tumor	378
TCGA_CD_A486_01A	68	M0	N0	T3	male	Dead	Cardia, NOS	stage iia	Primary Tumor	192
TCGA_CD_A489_01A	58	M0	N0	T3	male	Dead	Gastric antrum	stage iia	Primary Tumor	344
TCGA_CD_A48A_01A	57	M0	N0	T3	male	Alive	Cardia, NOS	stage iia	Primary Tumor	378
TCGA_CD_A48C_01A	79	M0	N1	T3	female	Dead	Gastric antrum	stage iib	Primary Tumor	353
TCGA_CD_A4MG_01A	76	M0	N0	T3	male	Dead	Cardia, NOS	stage iia	Primary Tumor	200
TCGA_CD_A4MH_01A	86	M0	N0	T3	female	Alive	Gastric antrum	stage iia	Primary Tumor	371
TCGA_CD_A4MI_01A	62	M0	N1	T3	male	Dead	Gastric antrum	stage iiia	Primary Tumor	358
TCGA_CD_A4MJ_01A	60	M0	N0	T2	male	Alive	Fundus of stomach	stage ib	Primary Tumor	384
TCGA_CG_4301_01A	75	M1	N1	T4	female	Alive	Cardia, NOS	stage iv	Primary Tumor	92
TCGA_CG_4304_01A	84	M0	N0	T2a	male	Alive	Cardia, NOS	stage ib	Primary Tumor	not reported
TCGA_CG_4305_01A	69	M0	N1	T2a	male	Alive	Gastric antrum	stage ii	Primary Tumor	485
TCGA_CG_4306_01A	90	M1	N2	T3	male	Dead	Gastric antrum	stage iv	Primary Tumor	1
TCGA_CG_4436_01A	57	M0	N0	T2	male	Alive	Stomach, NOS	stage ib	Primary Tumor	243
TCGA_CG_4437_01A	83	M0	N1	T2	male	Alive	Cardia, NOS	stage ii	Primary Tumor	245
TCGA_CG_4438_01A	56	M0	N2	T4	male	Alive	Gastric antrum	stage iv	Primary Tumor	1645
TCGA_CG_4440_01A	68	M1	N3	T3	female	Dead	Body of stomach	stage iv	Primary Tumor	122
TCGA_CG_4441_01A	83	M0	N2	T2	male	Dead	Body of stomach	stage iiia	Primary Tumor	426
TCGA_CG_4442_01A	85	M0	N0	T2	male	Alive	Gastric antrum	stage ib	Primary Tumor	not reported
TCGA_CG_4443_01A	68	M0	N0	T1	male	Alive	Body of stomach	stage ia	Primary Tumor	912
TCGA_CG_4444_01A	76	M0	N2	T2b	male	Alive	Body of stomach	stage iiia	Primary Tumor	1431
TCGA_CG_4449_01A	81	M0	N1	T2	male	Alive	Gastric antrum	stage ii	Primary Tumor	580
TCGA_CG_4460_01A	66	M1	N1	T4	female	Dead	Body of stomach	stage iv	Primary Tumor	669
TCGA_CG_4465_01A	69	M1	N3	T4	female	Dead	Gastric antrum	stage iv	Primary Tumor	274
TCGA_CG_4466_01A	81	M0	N0	T2a	female	Alive	Cardia, NOS	stage ib	Primary Tumor	577
TCGA_CG_4469_01A	70	M0	N3	T3	male	Dead	Stomach, NOS	stage iv	Primary Tumor	215
TCGA_CG_4472_01A	49	M0	N1	T4	male	Alive	Gastric antrum	stage iv	Primary Tumor	365
TCGA_CG_4474_01A	67	M1	N2	T4a	female	Alive	Gastric antrum	stage iv	Primary Tumor	not reported
TCGA_CG_4475_01A	76	M0	N1	T3	male	Alive	Stomach, NOS	stage iib	Primary Tumor	699
TCGA_CG_4476_01A	69	M0	N3a	T4b	male	Alive	Body of stomach	stage iiic	Primary Tumor	not reported
TCGA_CG_4477_01A	58	M0	N0	T2a	female	Alive	Cardia, NOS	stage ib	Primary Tumor	942
TCGA_CG_5716_01A	86	M1	N2	T4a	male	Alive	Gastric antrum	stage iv	Primary Tumor	not reported
TCGA_CG_5717_01A	58	M0	N1	T2b	male	Dead	Cardia, NOS	stage ii	Primary Tumor	212
TCGA_CG_5718_01A	78	M0	N1	T2b	female	Dead	Body of stomach	stage ii	Primary Tumor	1095
TCGA_CG_5719_01A	54	M1	N0	T4	female	Alive	Body of stomach	stage iv	Primary Tumor	31
TCGA_CG_5720_01A	71	M0	N0	T2	male	Dead	Cardia, NOS	stage ib	Primary Tumor	30
TCGA_CG_5721_01A	58	M0	N1	T4	male	Alive	Gastric antrum	stage iv	Primary Tumor	183
TCGA_CG_5722_01A	67	M1	N2	T3	female	Alive	Body of stomach	stage iv	Primary Tumor	30
TCGA_CG_5723_01A	83	M0	N1	T2	male	Alive	Cardia, NOS	stage ii	Primary Tumor	2496
TCGA_CG_5724_01A	59	M1	N3	T3	male	Dead	Gastric antrum	stage iv	Primary Tumor	366
TCGA_CG_5725_01A	72	M0	N0	T2	male	Dead	Cardia, NOS	stage ib	Primary Tumor	457
TCGA_CG_5726_01A	73	M0	N0	T1	male	Dead	Gastric antrum	stage ia	Primary Tumor	881
TCGA_CG_5732_01A	66	M0	N3	T2	male	Dead	Cardia, NOS	stage iv	Primary Tumor	2100
TCGA_CG_5734_01A	68	M0	N1	T3	male	Dead	Body of stomach	stage iiia	Primary Tumor	243
TCGA_D7_5577_01A	53	M0	N3	T2	female	Dead	Cardia, NOS	stage iiia	Primary Tumor	782
TCGA_D7_5578_01A	80	M0	N2	T3	male	Alive	Body of stomach	stage iiia	Primary Tumor	385
TCGA_D7_6518_01A	75	M0	N3	T2	male	Alive	Cardia, NOS	stage iiia	Primary Tumor	582
TCGA_D7_6519_01A	64	M0	N1	T2	female	Alive	Cardia, NOS	not reported	Primary Tumor	not reported
TCGA_D7_6520_01A	53	M0	N2	T2b	male	Alive	Gastric antrum	stage iiia	Primary Tumor	573
TCGA_D7_6521_01A	65	M0	N2	T2b	male	Alive	Body of stomach	not reported	Primary Tumor	not reported
TCGA_D7_6522_01A	58	M0	N0	T2	male	Alive	Gastric antrum	stage ib	Primary Tumor	566
TCGA_D7_6524_01A	53	M0	N1	T2	male	Alive	Gastric antrum	stage ii	Primary Tumor	543
TCGA_D7_6525_01A	58	M0	N2	T2	male	Dead	Cardia, NOS	stage iiia	Primary Tumor	406
TCGA_D7_6526_01A	67	M0	N2	T3	female	Alive	Body of stomach	stage iiia	Primary Tumor	523
TCGA_D7_6527_01A	62	M0	N1	T2	male	Dead	Cardia, NOS	stage ii	Primary Tumor	312
TCGA_D7_6528_01A	70	M0	N0	T2	female	Alive	Body of stomach	stage ib	Primary Tumor	463
TCGA_D7_6815_01A	70	M0	N2	T2	female	Alive	Body of stomach	stage iib	Primary Tumor	486
TCGA_D7_6817_01A	63	M0	N3	T2b	male	Alive	Body of stomach	stage iiia	Primary Tumor	389
TCGA_D7_6818_01A	53	M0	N3	T2	male	Dead	Body of stomach	stage iiia	Primary Tumor	376
TCGA_D7_6820_01A	64	M0	N1	T2	male	Alive	Body of stomach	stage iib	Primary Tumor	344
TCGA_D7_6822_01A	77	M0	N0	T2	male	Alive	Body of stomach	stage ib	Primary Tumor	375
TCGA_D7_8570_01A	44	M0	N3a	T3	male	Alive	Cardia, NOS	stage iiib	Primary Tumor	752
TCGA_D7_8572_01A	57	M0	N2	T2	male	Alive	Fundus of stomach	stage iib	Primary Tumor	511
TCGA_D7_8573_01A	57	M0	N0	T3	male	Alive	Fundus of stomach	stage iia	Primary Tumor	593
TCGA_D7_8574_01A	72	M0	N3a	T2	male	Alive	Gastric antrum	stage iiia	Primary Tumor	523
TCGA_D7_8575_01A	75	M0	N2	T3	male	Dead	Fundus of stomach	stage iiia	Primary Tumor	554
TCGA_D7_8576_01A	54	M0	N3a	T3	female	Dead	Gastric antrum	stage iiib	Primary Tumor	446
TCGA_D7_8578_01A	72	M0	N0	T2	male	Alive	Gastric antrum	stage ib	Primary Tumor	643
TCGA_D7_8579_01A	66	M0	N2	T2	female	Alive	Gastric antrum	stage iib	Primary Tumor	636
TCGA_D7_A4YT_01A	56	M0	N3a	T2	male	Alive	Cardia, NOS	stage iiia	Primary Tumor	434
TCGA_D7_A4YU_01A	73	M0	N3a	T3	male	Alive	Fundus of stomach	stage iiib	Primary Tumor	500
TCGA_D7_A4YV_01A	69	M0	N1	T3	female	Dead	Gastric antrum	stage iib	Primary Tumor	180
TCGA_D7_A4YX_01A	63	M0	N1	T3	male	Alive	Fundus of stomach	stage iib	Primary Tumor	1108
TCGA_D7_A4YY_01A	61	M0	N3a	T3	male	Alive	Gastric antrum	stage iiib	Primary Tumor	419
TCGA_D7_A4Z0_01A	60	M0	N2	T2	female	Alive	Gastric antrum	stage iib	Primary Tumor	449
TCGA_D7_A6EV_01A	71	M0	N2	T2	female	Alive	Gastric antrum	stage iib	Primary Tumor	342
TCGA_D7_A6EX_01A	72	M0	N2	T3	female	Alive	Gastric antrum	stage iiia	Primary Tumor	344
TCGA_D7_A6EY_01A	72	M0	N3a	T3	female	Dead	Gastric antrum	stage iiib	Primary Tumor	348
TCGA_D7_A6EZ_01A	66	M0	N2	T3	male	Dead	Fundus of stomach	stage iiia	Primary Tumor	618
TCGA_D7_A6F0_01A	79	M0	N0	T2	female	Alive	Cardia, NOS	stage ib	Primary Tumor	678
TCGA_D7_A6F2_01A	62	M0	N0	T2	male	Alive	Fundus of stomach	stage ib	Primary Tumor	476
TCGA_D7_A747_01A	57	M0	N1	T3	male	Dead	Gastric antrum	stage iib	Primary Tumor	255
TCGA_D7_A748_01A	41	M1	N3	T4a	female	Dead	Fundus of stomach	stage iv	Primary Tumor	132
TCGA_D7_A74A_01A	61	M0	N2	T3	female	Alive	Cardia, NOS	stage iiia	Primary Tumor	607
TCGA_EQ_8122_01A	71	MX	N1	T3	female	Dead	Gastric antrum	stage iib	Primary Tumor	not reported
TCGA_EQ_A4SO_01A	70	MX	N1	T4b	male	Alive	Gastric antrum	stage iiib	Primary Tumor	not reported
TCGA_F1_6177_01A	90	MX	N1	T1b	male	Dead	Gastric antrum	stage i	Primary Tumor	not reported
TCGA_F1_6874_01A	79	M0	N0	T2	male	Alive	Cardia, NOS	stage ib	Primary Tumor	440
TCGA_F1_6875_01A	79	M0	N0	T2	male	Dead	Gastric antrum	stage ia	Primary Tumor	2197
TCGA_F1_A448_01A	70	M0	N3b	T3	male	Alive	Gastric antrum	stage iiib	Primary Tumor	647
TCGA_F1_A72C_01A	68	M0	N0	T3	male	Alive	Stomach, NOS	stage iia	Primary Tumor	346
TCGA_FP_7735_01A	77	MX	N0	T2	male	Dead	Cardia, NOS	stage ib	Primary Tumor	not reported
TCGA_FP_7829_01A	69	M0	N1	T3	male	Alive	Cardia, NOS	stage iib	Primary Tumor	594
TCGA_FP_7916_01A	77	MX	N3a	T4a	male	Dead	Gastric antrum	stage iiic	Primary Tumor	not reported
TCGA_FP_7998_01A	77	MX	N3a	T4a	male	Alive	Body of stomach	stage iiic	Primary Tumor	not reported
TCGA_FP_8099_01A	79	MX	N0	T3	male	Alive	Cardia, NOS	stage iia	Primary Tumor	not reported
TCGA_FP_8209_01A	49	M0	N0	T2a	male	Dead	Gastric antrum	stage ib	Primary Tumor	1811
TCGA_FP_8210_01A	48	M0	N1	T3	male	Dead	Gastric antrum	stage iiia	Primary Tumor	153
TCGA_FP_8211_01A	62	MX	N1	T3	male	Alive	Cardia, NOS	stage iib	Primary Tumor	not reported
TCGA_FP_8631_01A	68	MX	N2	T3	male	Alive	Cardia, NOS	stage iiia	Primary Tumor	not reported
TCGA_FP_A4BE_01A	55	M0	N0	T3	male	Alive	Fundus of stomach	stage iia	Primary Tumor	337
TCGA_FP_A4BF_01A	68	M0	N2	T3	male	Dead	Cardia, NOS	stage iiia	Primary Tumor	168
TCGA_FP_A8CX_01A	60	MX	N3a	T4b	male	Alive	Body of stomach	stage iiic	Primary Tumor	not reported
TCGA_FP_A9TM_01A	77	M0	N1	T1b	male	Alive	Cardia, NOS	not reported	Primary Tumor	not reported
TCGA_HF_7131_01A	not reported	MX	N0	T2b	female	Alive	Stomach, NOS	stage ib	Primary Tumor	not reported
TCGA_HF_7132_01A	not reported	M0	N1	T2b	male	Alive	Gastric antrum	stage ii	Primary Tumor	not reported
TCGA_HF_7133_01A	not reported	M0	N3	T2b	female	Alive	Stomach, NOS	stage iv	Primary Tumor	not reported
TCGA_HF_7134_01A	not reported	M0	N0	T1	male	Alive	Body of stomach	stage ia	Primary Tumor	not reported
TCGA_HF_A5NB_01A	75	M0	N3a	T4a	female	Alive	Gastric antrum	stage iiic	Primary Tumor	928
TCGA_HJ_7597_01A	71	MX	N0	T2b	female	Dead	Body of stomach	stage ib	Primary Tumor	not reported
TCGA_HU_8238_01A	56	M0		T3	male	Alive	Gastric antrum	not reported	Primary Tumor	not reported
TCGA_HU_8243_01A	66	M0	N3b	T4a	male	Dead	Body of stomach	stage iiic	Primary Tumor	180
TCGA_HU_8244_01A	77	M0	N0	T1a	female	Alive	Body of stomach	stage ia	Primary Tumor	742
TCGA_HU_8249_01A	76	M0	N2	T3	male	Alive	Body of stomach	stage iiia	Primary Tumor	881
TCGA_HU_8602_01A	58	M0	N0	T4a	female	Alive	Gastric antrum	stage iib	Primary Tumor	679
TCGA_HU_8604_01A	82	M0	N0	T3	female	Alive	Gastric antrum	stage iia	Primary Tumor	694
TCGA_HU_8608_01A	70	M0	N2	T4a	male	Alive	Body of stomach	stage iiib	Primary Tumor	641
TCGA_HU_8610_01A	75	M0	N0	T1b	male	Alive	Body of stomach	stage ia	Primary Tumor	23
TCGA_HU_A4G2_01A	45	M0	N1	T3	male	Alive	Gastric antrum	stage iib	Primary Tumor	739
TCGA_HU_A4G3_01A	54	M0	N2	T2	male	Alive	Gastric antrum	stage iib	Primary Tumor	170
TCGA_HU_A4G6_01A	74	M0	N0	T1b	male	Alive	Cardia, NOS	stage ia	Primary Tumor	738
TCGA_HU_A4G8_01A	71	M0	N1	T3	female	Alive	Gastric antrum	stage iib	Primary Tumor	690
TCGA_HU_A4G9_01A	67	M0	N0	T1a	female	Alive	Body of stomach	stage ia	Primary Tumor	736
TCGA_HU_A4GC_01A	74	M0	N2	T4a	male	Alive	Gastric antrum	stage iiib	Primary Tumor	99
TCGA_HU_A4GD_01A	56	M0	N1	T3	male	Alive	Gastric antrum	stage iib	Primary Tumor	692
TCGA_HU_A4GF_01A	69	M0	N0	T3	male	Alive	Gastric antrum	stage iia	Primary Tumor	785
TCGA_HU_A4GH_01A	75	M0	N0	T1b	male	Alive	Body of stomach	stage ia	Primary Tumor	358
TCGA_HU_A4GJ_01A	60	M0	N3a	T4	female	Alive	Gastric antrum	stage iiic	Primary Tumor	650
TCGA_HU_A4GN_01A	61	M0	N1	T2	male	Alive	Gastric antrum	stage iia	Primary Tumor	912
TCGA_HU_A4GP_01A	62	M0	N1	T2	female	Alive	Gastric antrum	stage iia	Primary Tumor	273
TCGA_HU_A4GQ_01A	71	M0	N2	T4b	male	Dead	Gastric antrum	stage iiic	Primary Tumor	3
TCGA_HU_A4GT_01A	71	M0	N0	T3	female	Alive	Gastric antrum	stage iia	Primary Tumor	198
TCGA_HU_A4GU_01A	73	M0	N1	T3	male	Alive	Gastric antrum	stage iib	Primary Tumor	200
TCGA_HU_A4GX_01A	70	M0	N2	T4b	female	Alive	Gastric antrum	stage iiic	Primary Tumor	616
TCGA_HU_A4GY_01A	76	M0	N1	T4	female	Alive	Gastric antrum	stage iiia	Primary Tumor	8
TCGA_HU_A4H0_01A	72	M0	N3b	T4a	male	Alive	Body of stomach	stage iiic	Primary Tumor	64
TCGA_HU_A4H2_01A	58	M0	N3b	T3	female	Alive	Gastric antrum	stage iiib	Primary Tumor	394
TCGA_HU_A4H3_01A	56	M0	N3b	T4a	female	Alive	Body of stomach	stage iiic	Primary Tumor	882
TCGA_HU_A4H4_01A	53	M0	N2	T2	female	Alive	Gastric antrum	stage iib	Primary Tumor	725
TCGA_HU_A4H5_01A	71	M0	N0	T2	male	Alive	Fundus of stomach	stage ib	Primary Tumor	724
TCGA_HU_A4H6_01A	72	M0	N2	T3	female	Alive	Gastric antrum	stage iiia	Primary Tumor	644
TCGA_HU_A4H8_01A	77	M0	N1	T1b	male	Not Reported	Gastric antrum	stage ib	Primary Tumor	428
TCGA_HU_A4HB_01A	68	M0	N2	T2	male	Dead	Gastric antrum	stage iib	Primary Tumor	477
TCGA_HU_A4HD_01A	73	M0	N2	T3	male	Alive	Gastric antrum	stage iiia	Primary Tumor	1016
TCGA_IN_7806_01A	50	M0	N1	T3	male	Alive	Cardia, NOS	stage iib	Primary Tumor	1106
TCGA_IN_7808_01A	59	M1	N3	T3	male	Dead	Cardia, NOS	not reported	Primary Tumor	not reported
TCGA_IN_8462_01A	80	M0	N1	T2	male	Alive	Cardia, NOS	stage iib	Primary Tumor	572
TCGA_IN_8663_01A	68	M0	N2	T2	male	Dead	Cardia, NOS	stage iib	Primary Tumor	103
TCGA_IN_A6RI_01A	45	M0	N0	T1b	male	Alive	Cardia, NOS	stage i	Primary Tumor	559
TCGA_IN_A6RJ_01A	64	M0	N0	T1b	male	Alive	Cardia, NOS	stage ia	Primary Tumor	379
TCGA_IN_A6RL_01A	84	M0	N1	T2	male	Dead	Cardia, NOS	not reported	Primary Tumor	not reported
TCGA_IN_A6RR_01A	84	M0	N1	T3	male	Dead	Cardia, NOS	not reported	Primary Tumor	not reported
TCGA_IN_A6RS_01A	76	M0	N0	T1b	male	Alive	Cardia, NOS	stage ia	Primary Tumor	383
TCGA_IN_A7NR_01A	64	M1	N3	T3	female	Alive	Cardia, NOS	stage iv	Primary Tumor	198
TCGA_IN_A7NT_01A	73	M0	N1	T3	female	Alive	Cardia, NOS	stage iib	Primary Tumor	323
TCGA_IN_A7NU_01A	69	M0	N3	T3	male	Alive	Cardia, NOS	stage iiib	Primary Tumor	356
TCGA_IN_AB1V_01A	63	M0	N0	T1b	male	Alive	Cardia, NOS	stage ia	Primary Tumor	479
TCGA_IN_AB1X_01A	78	M0	N0	T3	female	Alive	Cardia, NOS	stage iia	Primary Tumor	411
TCGA_IP_7968_01A	74	MX	N2	T3	male	Alive	Cardia, NOS	stage iiib	Primary Tumor	not reported
TCGA_KB_A6F7_01A	54	M0	N1	T1	female	Alive	Body of stomach	stage ib	Primary Tumor	1935
TCGA_KB_A93G_01A	68	M0	N0	T2	male	Alive	Cardia, NOS	stage ib	Primary Tumor	613
TCGA_KB_A93H_01A	79	M0	N1	T3	female	Alive	Body of stomach	stage iib	Primary Tumor	1145
TCGA_KB_A93J_01A	78	M0	N1	T2b	male	Alive	Cardia, NOS	stage ii	Primary Tumor	1124
TCGA_MX_A5UG_01A	78	M0	N1	T3	male	Dead	Gastric antrum	stage iiia	Primary Tumor	113
TCGA_MX_A5UJ_01A	86	M0	N2	T3	female	Alive	Gastric antrum	stage iiia	Primary Tumor	600
TCGA_MX_A663_01A	66	M0	N0	T3	male	Dead	Stomach, NOS	stage iia	Primary Tumor	300
TCGA_MX_A666_01A	61	MX	NX	T2	male	Alive	Stomach, NOS	stage iia	Primary Tumor	not reported
TCGA_R5_A7O7_01A	51	M1	N1	T3	male	Alive	Cardia, NOS	stage iv	Primary Tumor	1389
TCGA_R5_A7ZF_01A	65	M1	N1	T4a	female	Dead	Gastric antrum	stage iv	Primary Tumor	259
TCGA_R5_A7ZI_01A	44	M1	N1	T4	female	Alive	Stomach, NOS	stage iv	Primary Tumor	2267
TCGA_R5_A7ZR_01A	70	M0	NX	T3	female	Dead	Body of stomach	stage iii	Primary Tumor	not reported
TCGA_R5_A805_01A	71	M0	N2	T3	male	Dead	Cardia, NOS	stage iiib	Primary Tumor	281
TCGA_RD_A7BS_01A	46	M0	N1	T3	male	Dead	Cardia, NOS	stage iiia	Primary Tumor	336
TCGA_RD_A7BT_01A	66	M0	N3	T3	male	Dead	Fundus of stomach	stage iv	Primary Tumor	262
TCGA_RD_A7BW_01A	68	M0	N0	T2	female	Dead	Fundus of stomach	stage ib	Primary Tumor	156
TCGA_RD_A7C1_01A	82	M0	N0	T2	male	Dead	Fundus of stomach	stage ib	Primary Tumor	507
TCGA_RD_A8MV_01A	56	M0	N2	T3	male	Alive	Body of stomach	stage iiib	Primary Tumor	3720
TCGA_RD_A8MW_01A	72	M0	N2	T3	male	Dead	Gastric antrum	stage iiib	Primary Tumor	1153
TCGA_RD_A8N0_01A	53	M0	N2	T3	female	Alive	Fundus of stomach	stage iiib	Primary Tumor	1236
TCGA_RD_A8N1_01A	70	M0	N2	T3	male	Alive	Body of stomach	stage iiib	Primary Tumor	3519
TCGA_RD_A8N2_01A	59	M0	N0	T2	female	Alive	Gastric antrum	stage ib	Primary Tumor	3540
TCGA_RD_A8N4_01A	58	M0	N1	T3	female	Alive	Gastric antrum	stage iiia	Primary Tumor	2171
TCGA_RD_A8N5_01A	78	M0	N1	T3	male	Dead	Fundus of stomach	stage iiia	Primary Tumor	1747
TCGA_RD_A8N6_01A	78	M0	N2	T2	female	Dead	Gastric antrum	stage iiia	Primary Tumor	272
TCGA_RD_A8N9_01A	63	M0	N1	T2	female	Alive	Cardia, NOS	stage ii	Primary Tumor	1083
TCGA_RD_A8NB_01A	80	M0	N1	T3	female	Dead	Cardia, NOS	stage iiia	Primary Tumor	513
TCGA_SW_A7EA_01A	61	M0	N0	T2	female	Alive	Gastric antrum	stage ib	Primary Tumor	579
TCGA_SW_A7EB_01A	45	M0	N2	T3	male	Alive	Gastric antrum	stage iiia	Primary Tumor	176
TCGA_VQ_A8DT_01A	43	M0	N3a	T3	male	Alive	Body of stomach	stage iiib	Primary Tumor	1484
TCGA_VQ_A8DU_01A	63	M0	N2	T3	male	Dead	Gastric antrum	stage iiia	Primary Tumor	166
TCGA_VQ_A8DV_01A	48	M0	N0	T2	male	Dead	Gastric antrum	stage ib	Primary Tumor	403
TCGA_VQ_A8DZ_01A	70	M1	N3	T4	male	Dead	Gastric antrum	stage iv	Primary Tumor	396
TCGA_VQ_A8E0_01A	68	M0	N2	T3	male	Dead	Body of stomach	stage iiia	Primary Tumor	562
TCGA_VQ_A8E2_01A	57	M0	N2	T3	male	Alive	Body of stomach	stage iiib	Primary Tumor	1319
TCGA_VQ_A8E3_01A	79	M0	N0	T3	male	Dead	Gastric antrum	stage iia	Primary Tumor	661
TCGA_VQ_A8P2_01A	68	M0	N1	T4a	male	Alive	Body of stomach	stage iiia	Primary Tumor	1160
TCGA_VQ_A8P3_01A	72	M0	N1	T4	male	Alive	Body of stomach	stage iiia	Primary Tumor	1132
TCGA_VQ_A8P5_01A	67	M0	N0	T3	male	Dead	Body of stomach	stage iia	Primary Tumor	235
TCGA_VQ_A8P8_01A	72	M0	N0	T4a	female	Alive	Body of stomach	stage iib	Primary Tumor	942
TCGA_VQ_A8PB_01A	65	M0	N0	T3	female	Dead	Gastric antrum	stage ii	Primary Tumor	1043
TCGA_VQ_A8PC_01A	65	M0	N1	T3	male	Dead	Gastric antrum	stage iiia	Primary Tumor	1407
TCGA_VQ_A8PD_01A	69	M0	N3	T4a	male	Dead	Body of stomach	stage iiic	Primary Tumor	496
TCGA_VQ_A8PE_01A	78	M0	N3a	T3	male	Dead	Cardia, NOS	stage iiib	Primary Tumor	675
TCGA_VQ_A8PF_01A	76	M0	N3b	T3	male	Dead	Body of stomach	stage iiib	Primary Tumor	76
TCGA_VQ_A8PH_01A	62	M0	N3	T3	male	Dead	Gastric antrum	stage iiib	Primary Tumor	389
TCGA_VQ_A8PJ_01A	53	M1	N2	T4	male	Dead	Body of stomach	stage iv	Primary Tumor	82
TCGA_VQ_A8PK_01A	58	M0	N3a	T3	male	Dead	Cardia, NOS	stage iiib	Primary Tumor	543
TCGA_VQ_A8PM_01A	56	M0	N3	T4	male	Dead	Cardia, NOS	stage iv	Primary Tumor	57
TCGA_VQ_A8PO_01A	74	M0	N0	T4a	male	Dead	Gastric antrum	stage iib	Primary Tumor	282
TCGA_VQ_A8PP_01A	76	M0	N1	T4	male	Dead	Body of stomach	stage iv	Primary Tumor	712
TCGA_VQ_A8PQ_01A	50	M1	N1	T4	female	Dead	Cardia, NOS	stage iv	Primary Tumor	476
TCGA_VQ_A8PU_01A	72	M0	N1	T4a	female	Dead	Body of stomach	stage iiia	Primary Tumor	832
TCGA_VQ_A8PX_01A	51	M0	N0	T1	male	Alive	Stomach, NOS	stage ia	Primary Tumor	1964
TCGA_VQ_A91A_01A	67	M0	N3a	T3	male	Alive	Body of stomach	stage iiib	Primary Tumor	1200
TCGA_VQ_A91D_01A	70	M0	N2	T4b	male	Dead	Body of stomach	stage iiic	Primary Tumor	356
TCGA_VQ_A91E_01A	67	M0	N0	T4b	female	Alive	Gastric antrum	stage iiib	Primary Tumor	664
TCGA_VQ_A91K_01A	69	M0	N1	T3	male	Alive	Gastric antrum	stage iiia	Primary Tumor	1862
TCGA_VQ_A91N_01A	59	M0	N3	T4	female	Dead	Gastric antrum	stage iv	Primary Tumor	570
TCGA_VQ_A91Q_01A	61	M0	N3	T3	male	Dead	Cardia, NOS	stage iv	Primary Tumor	633
TCGA_VQ_A91S_01A	63	M0	N1	T4b	male	Alive	Body of stomach	stage iiib	Primary Tumor	1000
TCGA_VQ_A91U_01A	78	M0	N1	T3	male	Dead	Cardia, NOS	stage iiia	Primary Tumor	52
TCGA_VQ_A91V_01A	58	M0	N2	T3	male	Alive	Cardia, NOS	stage iiia	Primary Tumor	1297
TCGA_VQ_A91W_01A	30	M0	N1	T3	male	Alive	Body of stomach	stage iiia	Primary Tumor	1851
TCGA_VQ_A91X_01A	74	M0	N2	T3	male	Dead	Gastric antrum	stage iiib	Primary Tumor	289
TCGA_VQ_A91Y_01A	67	M0	N3b	T4a	male	Dead	Gastric antrum	stage iiic	Primary Tumor	296
TCGA_VQ_A91Z_01A	67	M0	N1	T3	female	Alive	Gastric antrum	stage iiia	Primary Tumor	1690
TCGA_VQ_A922_01A	70	M0	N1	T4	male	Dead	Gastric antrum	stage iv	Primary Tumor	275
TCGA_VQ_A924_01A	69	M0	N0	T3	male	Dead	Gastric antrum	stage ii	Primary Tumor	1686
TCGA_VQ_A925_01A	66	M0	N2	T3	male	Dead	Gastric antrum	stage iiia	Primary Tumor	138
TCGA_VQ_A927_01A	81	M0	N3	T3	male	Dead	Body of stomach	stage iiib	Primary Tumor	200
TCGA_VQ_A928_01A	49	M0	N3	T3	male	Dead	Body of stomach	stage iv	Primary Tumor	174
TCGA_VQ_A92D_01A	67	M0	N0	T2b	male	Alive	Cardia, NOS	stage ib	Primary Tumor	2032
TCGA_VQ_A94O_01A	74	M0	N3	T4a	male	Dead	Gastric antrum	stage iiic	Primary Tumor	640
TCGA_VQ_A94P_01A	57	MX	NX	T4	male	Dead	Body of stomach	not reported	Primary Tumor	not reported
TCGA_VQ_A94R_01A	63	M0	N2	T4a	male	Dead	Gastric antrum	not reported	Primary Tumor	not reported
TCGA_VQ_A94T_01A	73	M0	N2	T3	male	Dead	Cardia, NOS	stage iiib	Primary Tumor	342
TCGA_VQ_A94U_01A	70	M0	N0	T4a	male	Alive	Gastric antrum	stage iib	Primary Tumor	819
TCGA_VQ_AA64_01A	68	M0	N2	T3	male	Dead	Cardia, NOS	stage iiib	Primary Tumor	560
TCGA_VQ_AA68_01A	52	M0	N3	T4a	female	Alive	Cardia, NOS	stage iiic	Primary Tumor	1328
TCGA_VQ_AA69_01A	35	M0	N2	T3	male	Alive	Cardia, NOS	stage iiia	Primary Tumor	864
TCGA_VQ_AA6A_01A	56	M0	N3a	T4	male	Alive	Cardia, NOS	stage iiic	Primary Tumor	1184
TCGA_VQ_AA6B_01A	48	M0	N2	T3	male	Alive	Cardia, NOS	stage iiib	Primary Tumor	1002
TCGA_VQ_AA6D_01A	52	M0	N1	T4a	female	Alive	Gastric antrum	stage iiia	Primary Tumor	521
TCGA_VQ_AA6F_01A	57	M0	N1	T3	male	Alive	Cardia, NOS	stage iib	Primary Tumor	1646
TCGA_VQ_AA6G_01A	68	M0	N0	T3	male	Dead	Cardia, NOS	stage iia	Primary Tumor	792
TCGA_VQ_AA6I_01A	68	M0	N3	T3	male	Dead	Cardia, NOS	stage iiib	Primary Tumor	491
TCGA_VQ_AA6J_01A	75	M0	N2	T4a	male	Alive	Cardia, NOS	stage iiib	Primary Tumor	838
TCGA_VQ_AA6K_01A	59	M0	N3a	T4a	male	Dead	Cardia, NOS	stage iiic	Primary Tumor	378
TCGA_ZA_A8F6_01A	71	MX	N0	T2	male	Alive	Gastric antrum	stage ib	Primary Tumor	not reported
TCGA_ZQ_A9CR_01A	79	MX	N3	T4a	female	Dead	Gastric antrum	stage iiic	Primary Tumor	not reported
TCGA_BR_6453_11A	54	M0	N1	T2	male	Alive	Body of stomach	stage iia	Solid Tissue Normal	not reported
TCGA_BR_6454_11A	58	M0	N0	T3	male	Alive	Cardia, NOS	stage iia	Solid Tissue Normal	not reported
TCGA_BR_6457_11A	69	M0	N0	T3	male	Alive	Body of stomach	stage iia	Solid Tissue Normal	not reported
TCGA_BR_6458_11A	57	M0	N1	T3	female	Dead	Body of stomach	stage iib	Solid Tissue Normal	not reported
TCGA_BR_6564_11A	46	M0	N2	T3	female	Dead	Body of stomach	stage iiia	Solid Tissue Normal	not reported
TCGA_BR_6802_11A	65	M0	N2	T3	male	Alive	Body of stomach	stage iiia	Solid Tissue Normal	not reported
TCGA_BR_6852_11A	64	M0	N0	T3	female	Alive	Cardia, NOS	stage iia	Solid Tissue Normal	not reported
TCGA_BR_7703_11A	81	M0	N0	T1b	male	Alive	Body of stomach	stage ia	Solid Tissue Normal	not reported
TCGA_BR_7704_11A	69	M0	N0	T3	female	Alive	Body of stomach	stage ii	Solid Tissue Normal	not reported
TCGA_BR_7715_11A	65	M0	N0	T3	male	Alive	Body of stomach	stage iia	Solid Tissue Normal	not reported
TCGA_BR_7716_11A	62	M0	N1	T3	female	Alive	Body of stomach	stage iib	Solid Tissue Normal	not reported
TCGA_BR_7717_11A	63	M0	N1	T4	male	Dead	Cardia, NOS	stage iv	Solid Tissue Normal	not reported
TCGA_BR_7851_11A	74	M0	N0	T4a	male	Dead	Body of stomach	stage iib	Solid Tissue Normal	not reported
TCGA_BR_8060_11A	75	M0	N2	T2	female	Dead	Cardia, NOS	stage iib	Solid Tissue Normal	not reported
TCGA_CG_5720_11A	71	M0	N0	T2	male	Dead	Cardia, NOS	stage ib	Solid Tissue Normal	not reported
TCGA_CG_5722_11A	67	M1	N2	T3	female	Alive	Body of stomach	stage iv	Solid Tissue Normal	not reported
TCGA_CG_5728_11A	88	M0	N0	T2	female	Alive	Gastric antrum	stage ib	Solid Tissue Normal	not reported
TCGA_CG_5730_11A	80	M1	N1	T2	female	Alive	Cardia, NOS	stage iv	Solid Tissue Normal	not reported
TCGA_CG_5733_11A	83	M0	N2	T2	female	Dead	Gastric antrum	stage iiia	Solid Tissue Normal	not reported
TCGA_CG_5734_11A	68	M0	N1	T3	male	Dead	Body of stomach	stage iiia	Solid Tissue Normal	not reported
TCGA_FP_7735_11A	77	MX	N0	T2	male	Dead	Cardia, NOS	stage ib	Solid Tissue Normal	not reported
TCGA_FP_7829_11A	69	M0	N1	T3	male	Alive	Cardia, NOS	stage iib	Solid Tissue Normal	not reported
TCGA_HU_8238_11A	56	M0		T3	male	Alive	Gastric antrum	not reported	Solid Tissue Normal	not reported
TCGA_HU_A4G3_11A	54	M0	N2	T2	male	Alive	Gastric antrum	stage iib	Solid Tissue Normal	not reported
TCGA_HU_A4GC_11A	74	M0	N2	T4a	male	Alive	Gastric antrum	stage iiib	Solid Tissue Normal	not reported
TCGA_HU_A4GH_11A	75	M0	N0	T1b	male	Alive	Body of stomach	stage ia	Solid Tissue Normal	not reported
TCGA_HU_A4GN_11A	61	M0	N1	T2	male	Alive	Gastric antrum	stage iia	Solid Tissue Normal	not reported
TCGA_HU_A4GP_11A	62	M0	N1	T2	female	Alive	Gastric antrum	stage iia	Solid Tissue Normal	not reported
TCGA_HU_A4GY_11A	76	M0	N1	T4	female	Alive	Gastric antrum	stage iiia	Solid Tissue Normal	not reported
TCGA_HU_A4HB_11A	68	M0	N2	T2	male	Dead	Gastric antrum	stage iib	Solid Tissue Normal	not reported
TCGA_IN_7806_11A	50	M0	N1	T3	male	Alive	Cardia, NOS	stage iib	Solid Tissue Normal	not reported
TCGA_IN_8462_11A	80	M0	N1	T2	male	Alive	Cardia, NOS	stage iib	Solid Tissue Normal	not reported
TCGA_IN_8663_11A	68	M0	N2	T2	male	Dead	Cardia, NOS	stage iib	Solid Tissue Normal	not reported
TCGA_IN_AB1V_11A	63	M0	N0	T1b	male	Alive	Cardia, NOS	stage ia	Solid Tissue Normal	not reported
TCGA_IN_AB1X_11A	78	M0	N0	T3	female	Alive	Cardia, NOS	stage iia	Solid Tissue Normal	not reported
TCGA_IP_7968_11A	74	MX	N2	T3	male	Alive	Cardia, NOS	stage iiib	Solid Tissue Normal	not reported
TCGA_3M_AB47_01A	51	MX	N2	T3	male	Dead	Stomach, NOS	stage iiib	Primary Tumor	not reported
TCGA_CG_4462_01A	72	M1	N3	T3	female	Dead	Stomach, NOS	stage iv	Primary Tumor	not reported
TCGA_HF_7136_01A	not reported	M0	N1	T3	male	Alive	Cardia, NOS	stage iiia	Primary Tumor	not reported
TCGA_IN_A6RO_01A	70	M0	N0	T1b	male	Dead	Cardia, NOS	stage ia	Primary Tumor	not reported
TCGA_R5_A7ZE_01B	66	M0	N2	T3	female	Dead	Cardia, NOS	stage iiia	Primary Tumor	not reported
TCGA_VQ_A8E7_01B	59	M1	N1	T3	male	Alive	Cardia, NOS	stage iv	Primary Tumor	not reported
TCGA_VQ_A923_01A	90	M0	N1	T3	male	Dead	Body of stomach	stage iiia	Primary Tumor	not reported

## Sheet: S2
Supplementary Table S2. Details of baseline information in GSE15459
GSM ID	Subtype	Age_at_surgery	Gender	Laurenclassification	Stage	Overall.Survival (Months)**	Outcome (1=dead)
GSM387789	Invasive	76	Male	Mixed	4	30.47	0
GSM387791	Metabolic	40	Male	Intestinal	4	20.33	0
GSM387792	Proliferative	73	Male	Intestinal	4	11.73	1
GSM387794	Invasive	56	Male	Intestinal	4	26.27	1
GSM387795	Invasive	29	Male	Diffuse	3	27.07	0
GSM387796	Metabolic	67	Male	Intestinal	3	20.5	1
GSM387800	Unstable	69	Male	Mixed	3	7	0
GSM387801	Unstable	49	Female	Intestinal	1	20.13	0
GSM387802	Metabolic	78	Male	Mixed	1	15.2	0
GSM387803	Metabolic	88	Female	Intestinal	4	32.7	0
GSM387804	Invasive	72	Female	Diffuse	3	12.67	0
GSM387805	Metabolic	76	Female	Intestinal	1	10.9	0
GSM387806	Proliferative	76	Male	Diffuse	3	19.73	0
GSM387807	Metabolic	65	Male	Intestinal	2	4.93	0
GSM387808	Proliferative	73	Male	Intestinal	4	5.87	0
GSM387809	Proliferative	82	Female	Diffuse	3	4.7	0
GSM387810	Unstable	73	Male	Mixed	1	3.7	0
GSM387811	Proliferative	70	Male	Intestinal	4	3.23	1
GSM387812	Proliferative	72	Male	Intestinal	3	11.1	0
GSM387813	Proliferative	74	Male	Intestinal	1	3.93	0
GSM387814	Invasive	27.6	Female	Diffuse	4	17.2	1
GSM387815	Metabolic	67.7	Male	Intestinal	2	62.93	0
GSM387816	Invasive	70.1	Male	Diffuse	4	1.67	1
GSM387817	Metabolic	64.3	Female	Intestinal	1	88.07	0
GSM387818	Proliferative	52.6	Male	Intestinal	2	108.7	0
GSM387819	Metabolic	53.1	Male	Diffuse	4	29.17	1
GSM387820	Metabolic	52.7	Male	Intestinal	4	129.9	0
GSM387821	Unstable	53	Female	Intestinal	1	122.97	0
GSM387822	Proliferative	78.3	Male	Intestinal	3	0.2	0
GSM387823	Proliferative	64.3	Male	Intestinal	4	6.6	1
GSM387824	Invasive	71.3	Female	Intestinal	2	126.5	0
GSM387825	Unstable	69.9	Male	Intestinal	1	125.5	0
GSM387826	Invasive	74.4	Female	Diffuse	2	11.07	0
GSM387827	Invasive	67.4	Female	Intestinal	1	93.2	0
GSM387828	Proliferative	61.4	Female	Mixed	3	117.77	0
GSM387829	Metabolic	65.3	Male	Intestinal	2	127.47	0
GSM387830	Proliferative	67.9	Male	Diffuse	3	87	1
GSM387831	Proliferative	47.6	Male	Diffuse	4	10.37	1
GSM387832	Invasive	31.8	Female	Diffuse	3	125.53	0
GSM387833	Proliferative	50.6	Male	Intestinal	3	8.53	1
GSM387834	Invasive	67.6	Male	Diffuse	2	41.97	1
GSM387835	Proliferative	55.7	Female	Diffuse	3	13.07	1
GSM387836	Invasive	52.8	Male	Diffuse	3	19.77	1
GSM387837	Invasive	81.7	Male	Diffuse	3	37.5	1
GSM387838	Invasive	62.4	Male	Intestinal	3	30.4	1
GSM387839	Proliferative	67.7	Male	Intestinal	3	0.3	0
GSM387840	Invasive	55.9	Male	Diffuse	1	129.27	0
GSM387841	Invasive	66.8	Female	Diffuse	4	4.17	1
GSM387842	Unstable	76.8	Male	Intestinal	4	17.13	1
GSM387843	Proliferative	76.9	Male	Intestinal	4	2.27	1
GSM387845	Unstable	69.5	Male	Intestinal	4	4.13	1
GSM387846	Proliferative	85	Female	Intestinal	3	94.3	1
GSM387847	Invasive	80	Female	Intestinal	1	110.53	1
GSM387848	Metabolic	58.2	Male	Intestinal	3	99.43	1
GSM387849	Unstable	70.9	Male	Diffuse	4	11.4	1
GSM387850	Invasive	59.9	Female	Diffuse	4	6.47	1
GSM387851	Invasive	61.5	Male	Diffuse	4	10.87	1
GSM387852	Invasive	61.7	Male	Mixed	4	17	1
GSM387853	Invasive	65.2	Male	Intestinal	4	16.6	1
GSM387854	Proliferative	44.6	Male	Intestinal	2	0.43	0
GSM387855	Proliferative	71.3	Female	Intestinal	2	114.63	0
GSM387856	Proliferative	80.4	Male	Intestinal	3	26.17	1
GSM387857	Invasive	49.9	Male	Diffuse	3	8.07	1
GSM387858	Unstable	39	Female	Diffuse	4	9.27	1
GSM387859	Unstable	79.6	Male	Diffuse	3	11.07	1
GSM387860	Metabolic	66.8	Male	Intestinal	4	0.23	0
GSM387861	Proliferative	56.1	Male	Intestinal	3	23.2	1
GSM387862	Invasive	64.1	Male	Diffuse	4	4.7	1
GSM387863	Invasive	78.4	Male	Intestinal	1	45.07	0
GSM387864	Metabolic	67.5	Female	Diffuse	3	4.3	1
GSM387865	Proliferative	64.8	Male	Diffuse	4	24.37	1
GSM387866	Invasive	75.6	Male	Diffuse	3	13.37	1
GSM387867	Proliferative	48.9	Female	Diffuse	2	22.8	1
GSM387868	Invasive	75.9	Female	Diffuse	2	66.57	0
GSM387869	Invasive	49.2	Male	Mixed	3	20.87	1
GSM387870	Invasive	56.3	Male	Intestinal	4	4.6	1
GSM387871	Unstable	68.4	Male	Intestinal	4	13.03	1
GSM387872	Proliferative	62.8	Male	Intestinal	1	85.63	0
GSM387873	Metabolic	64	Male	Diffuse	3	98.1	0
GSM387874	Unstable	81	Female	Intestinal	4	14.33	1
GSM387875	Invasive	79.4	Male	Intestinal	1	88.7	0
GSM387876	Invasive	45.6	Male	Diffuse	2	25.17	1
GSM387877	Unstable	72.5	Female	Diffuse	3	72.5	0
GSM387878	Unstable	63.3	Female	Diffuse	2	23.53	0
GSM387879	Metabolic	64.4	Male	Diffuse	1	31.2	1
GSM387880	Invasive	66.2	Female	Diffuse	1	74.97	0
GSM387881	Invasive	71.6	Male	Diffuse	4	12.27	1
GSM387882	Metabolic	84	Female	Intestinal	3	16.37	1
GSM387883	Metabolic	76.4	Male	Intestinal	2	42.5	0
GSM387884	Metabolic	87.7	Female	Diffuse	2	9.87	1
GSM387885	Metabolic	65.1	Male	Diffuse	3	38.43	0
GSM387886	Proliferative	69.4	Female	Mixed	2	72.77	0
GSM387887	Unstable	66.6	Male	Intestinal	4	5.83	1
GSM387888	Unstable	47.4	Female	Diffuse	1	35.7	0
GSM387889	Unstable	77.1	Male	Mixed	4	11.07	1
GSM387890	Unstable	62.8	Male	Diffuse	3	0.4	0
GSM387891	Metabolic	53.2	Female	Diffuse	1	64.57	0
GSM387892	Proliferative	79.5	Female	Intestinal	4	7.97	1
GSM387893	Metabolic	66.8	Female	Diffuse	3	52.97	0
GSM387894	Proliferative	84.5	Female	Intestinal	1	66.57	0
GSM387895	Proliferative	87.9	Male	Intestinal	3	2.63	0
GSM387896	Proliferative	80.3	Male	Intestinal	3	9.97	1
GSM387897	Unstable	56.9	Male	Diffuse	4	24.3	0
GSM387898	Invasive	68.4	Female	Mixed	2	78.6	1
GSM387899	Invasive	65	Female	Diffuse	3	11.77	1
GSM387900	Metabolic	68.4	Male	Intestinal	1	5.97	0
GSM387901	Proliferative	64.1	Male	Intestinal	1	82.87	0
GSM387902	Metabolic	47.7	Female	Intestinal	2	59.57	1
GSM387903	Proliferative	92.4	Male	Intestinal	3	41.23	1
GSM387904	Proliferative	75.4	Male	Mixed	2	74.33	0
GSM387905	Invasive	51.2	Female	Diffuse	4	6.27	1
GSM387906	Unstable	64.3	Female	Diffuse	3	13	0
GSM387907	Metabolic	69.5	Male	Mixed	3	63.53	0
GSM387908	Proliferative	62.3	Male	Intestinal	3	18.27	1
GSM387909	Invasive	56.5	Male	Diffuse	4	28.83	1
GSM387910	Proliferative	73.7	Male	Mixed	4	22.27	1
GSM387911	Invasive	43.2	Male	Mixed	4	24.9	1
GSM387912	Proliferative	38.1	Female	Diffuse	3	17.1	0
GSM387913	Proliferative	68.9	Male	Intestinal	4	7.03	1
GSM387914	Proliferative	72.9	Male	Intestinal	3	6.6	1
GSM387915	Invasive	57.5	Female	Diffuse	2	157.83	0
GSM387916	Metabolic	80.8	Male	Intestinal	1	63.7	1
GSM387917	Proliferative	58.9	Male	Intestinal	4	11.37	0
GSM387918	Metabolic	58.1	Female	Diffuse	1	155.03	0
GSM387919	Invasive	74.1	Male	Intestinal	4	10.43	0
GSM387920	Proliferative	59.1	Male	Intestinal	3	22.07	0
GSM387921	Proliferative	80.2	Male	Intestinal	4	0	0
GSM387922	Proliferative	60.9	Male	Intestinal	1	153.9	0
GSM387923	Proliferative	70.2	Male	Intestinal	3	0.03	0
GSM387924	Unstable	45.7	Female	Diffuse	4	4.83	0
GSM387925	Invasive	33.4	Female	Diffuse	2	123.63	1
GSM387926	Proliferative	49.2	Female	Diffuse	4	3.23	0
GSM387927	Proliferative	48.6	Female	Diffuse	4	39.4	1
GSM387928	Proliferative	65.4	Male	Mixed	2	27.17	0
GSM387929	Invasive	66.4	Male	Diffuse	4	11.53	1
GSM387930	Proliferative	63.6	Male	Intestinal	3	13.47	1
GSM387931	Invasive	52.7	Female	Diffuse	1	148.9	0
GSM387932	Proliferative	66.5	Male	Intestinal	4	26.53	1
GSM387933	Invasive	68.8	Male	Diffuse	4	13	0
GSM387934	Unstable	39	Female	Diffuse	3	141.77	0
GSM387935	Metabolic	23.4	Male	Intestinal	4	5.07	1
GSM387936	Invasive	67.8	Male	Mixed	3	32.63	1
GSM387938	Metabolic	69.8	Female	Diffuse	4	6.4	1
GSM387939	Metabolic	46.7	Female	Diffuse	1	146.13	0
GSM387940	Unstable	75.9	Female	Diffuse	3	3.27	1
GSM387941	Proliferative	77.9	Female	Intestinal	1	19.67	1
GSM387942	Invasive	82.9	Female	Diffuse	3	0.33	0
GSM387943	Invasive	67	Male	Diffuse	4	6.97	0
GSM387944	Metabolic	88	Male	Intestinal	3	85.63	0
GSM387945	Proliferative	65	Female	Intestinal	3	6.6	0
GSM387946	Metabolic	61.6	Female	Diffuse	2	14.6	1
GSM387947	Invasive	65	Male	Intestinal	4	17.9	1
GSM387948	Unstable	66	Male	Intestinal	3	137.47	0
GSM387949	Proliferative	66.4	Male	Mixed	3	2.6	0
GSM387950	Invasive	59.6	Male	Diffuse	3	12.63	1
GSM387951	Unstable	69.6	Male	Intestinal	4	1.57	0
GSM387952	Proliferative	68.1	Male	Intestinal	3	133.63	0
GSM387953	Proliferative	40.3	Male	Intestinal	4	8.6	0
GSM387954	Unstable	69.1	Male	Intestinal	3	21.4	1
GSM387955	Proliferative	55.5	Male	Diffuse	3	12.97	1
GSM387956	Metabolic	25.2	Female	Diffuse	3	12.87	0
GSM387957	Metabolic	73.3	Male	Diffuse	3	15.27	1
GSM387958	Proliferative	69.2	Male	Diffuse	1	80.7	0
GSM387959	Proliferative	71.2	Female	Intestinal	4	3.27	1
GSM387960	Invasive	59.2	Male	Intestinal	3	52.63	1
GSM387961	Metabolic	74.8	Male	Intestinal	4	20.27	1
GSM387962	Unstable	64.2	Male	Intestinal	3	9	1
GSM387963	Proliferative	46.2	Male	Intestinal	3	0.33	0
GSM387964	Proliferative	53.9	Female	Intestinal	4	10.57	1
GSM387965	Unstable	64.9	Male	Intestinal	2	58.93	0
GSM387966	Proliferative	74.3	Female	Intestinal	1	30	0
GSM387967	Unstable	56.4	Male	Diffuse	3	138.37	0
GSM387968	Metabolic	77.3	Female	Intestinal	3	15.33	1
GSM387969	Proliferative	76.3	Male	Intestinal	1	113.23	0
GSM387970	Unstable	40.7	Female	Intestinal	3	3.13	1
GSM387971	Proliferative	60.4	Male	Intestinal	3	23.57	1
GSM387972	Metabolic	31.2	Male	Intestinal	4	0.33	0
GSM387973	Proliferative	79.5	Male	Intestinal	3	7.33	0
GSM387974	Metabolic	72.3	Female	Intestinal	2	134.1	0
GSM387975	Proliferative	72	Male	Intestinal	3	14.83	1
GSM387976	Proliferative	71.6	Male	Intestinal	2	123.83	0
GSM387977	Proliferative	50.5	Female	Intestinal	3	45.8	1
GSM387978	Invasive	58.5	Female	Diffuse	2	39.97	1
GSM387979	Metabolic	34.3	Female	Diffuse	4	6.63	1
GSM387980	Invasive	64.8	Male	Diffuse	3	4.37	1
GSM387981	Proliferative	64.6	Male	Intestinal	3	24.63	1
GSM387982	Metabolic	67.7	Male	Diffuse	2	75.53	0
GSM387983	Unstable	70.8	Male	Diffuse	3	56.9	1
GSM387984	Proliferative	78.7	Female	Intestinal	3	2.23	0
GSM387985	Proliferative	70.9	Male	Intestinal	2	116.6	0
GSM387986	Proliferative	79.4	Male	Mixed	1	1.47	0
GSM387987	Proliferative	59.7	Male	Intestinal	4	7.73	1

## Sheet: S3
Supplementary Table S3. Details of baseline information in GSE66229
GEO_ID	SCRI No.	Sample	Death	OS.m	sex	age	T	N	M	pStage	revised location
GSM1523727	107	107T	0	88.73	M	67	2	1	0	II	body
GSM1523728	108	108T	0	88.23	F	68	2	1	0	II	body
GSM1523729	109	109T	0	88.23	F	42	2	1	0	II	antrum
GSM1523744	160	160T	0	105.7	M	69	2	1	0	II	antrum
GSM1523745	164	164T	0	105.53	M	68	3	2	0	III	antrum
GSM1523746	165	165T	1	25.5	M	56	2	1	0	II	antrum
GSM1523747	168	168T	1	8.7	M	60	2	2	0	III	antrum
GSM1523748	169	169T	0	104.93	F	68	3	1	0	III	antrum
GSM1523765	235	235T	1	14.2	F	52	3	2	0	III	body
GSM1523768	244	244T	1	24.23	M	52	2	2	0	III	body
GSM1523769	253	253T	1	13.73	F	71	3	3	0	IV	antrum
GSM1523770	255	255T	1	22.07	M	63	2	1	0	II	body
GSM1523771	256	256T	1	12.67	F	62	4	2	1	IV	antrum
GSM1523772	263	263T	1	10.03	F	58	3	1	1	IV	antrum
GSM1523773	268	268T	1	4.33	F	75	3	3	0	IV	body
GSM1523774	269	269T	0	97.7	M	56	2	2	0	III	antrum
GSM1523775	270	270T	0	97.6	F	77	2	1	0	II	antrum
GSM1523776	275	275T	0	97.47	M	48	2	1	0	II	antrum
GSM1523777	321	321T	0	92.93	M	60	2	3	0	IV	antrum
GSM1523778	322	322T	0	92.63	F	56	3	2	0	III	body
GSM1523779	323	323T	0	92.6	F	77	3	2	0	III	antrum
GSM1523780	324	324T	1	16.4	F	84	4	1	0	IV	antrum
GSM1523781	325	325T	1	2.93	F	37	2	3	0	IV	antrum
GSM1523782	326	326T	1	4.4	M	63	2	3	0	IV	antrum
GSM1523783	327	327T	0	91.93	F	55	2	2	0	III	body
GSM1523784	328	328T	0	91.3	F	44	2	2	0	III	body
GSM1523785	329	329T	1	11.77	F	60	2	1	0	II	antrum
GSM1523786	330	330T	1	28.47	F	44	2	3	1	IV	whole
GSM1523787	331	331T	0	89.63	F	57	2	3	0	IV	body
GSM1523788	333	333T	1	8.27	F	42	2	3	1	IV	body
GSM1523789	336	336T	1	11.8	M	69	2	3	1	IV	antrum
GSM1523790	337	337T	0	80.93	M	62	2	1	0	II	body
GSM1523791	338	338T	0	81.13	M	60	2	0	0	I	antrum
GSM1523792	339	339T	0	80.8	M	55	2	0	0	I	antrum
GSM1523793	341	341T	0	80.73	F	82	2	1	0	II	body
GSM1523794	343	343T	1	27	M	67	2	3	0	IV	cardia
GSM1523795	346	346T	0	80.07	M	70	2	0	0	I	body ，antrum
GSM1523796	355	355T	1	57.63	M	53	3	1	0	III	body
GSM1523797	361	361T	1	28.27	M	63	3	2	0	III	antrum
GSM1523798	363	363T	1	61.83	M	84	2	1	0	II	body
GSM1523799	369	369T	0	77.5	M	81	2	1	0	II	body
GSM1523800	372	372T	0	76.93	M	73	2	2	0	III	body
GSM1523801	374	374T	0	76.93	M	74	2	1	0	II	antrum
GSM1523802	375	375T	0	76.77	F	70	2	1	0	II	antrum
GSM1523803	376	376T	1	7.07	F	72	3	3	0	IV	cardia
GSM1523804	377	377T	0	76.7	F	37	3	1	0	III	antrum
GSM1523805	385	385T	1	4.47	F	72	3	2	0	III	body
GSM1523806	388	388T	1	12.7	M	68	3	2	0	III	body
GSM1523807	394	394T	0	73.73	F	70	2	1	0	II	antrum
GSM1523808	395	395T	0	73.5	M	56	3	1	0	III	antrum
GSM1523809	396	396T	0	73.43	M	77	2	1	0	II	antrum
GSM1523810	397	397T	0	73.07	M	66	2	0	0	I	antrum
GSM1523811	399	399T	0	72.87	F	80	2	0	0	I	antrum
GSM1523812	401	401T	0	72.83	M	62	3	1	0	III	body
GSM1523813	402	402T	0	72.83	M	70	3	1	0	III	antrum
GSM1523814	405	405T	0	72.73	M	68	2	1	0	II	body
GSM1523815	413	413T	1	25.17	M	64	2	2	0	III	antrum
GSM1523816	414	414T	0	72.07	M	66	2	1	0	II	cardia
GSM1523817	415	415T	1	6.23	M	73	3	3	0	IV	body
GSM1523818	416	416T	1	9.83	F	66	3	3	0	IV	body
GSM1523819	419	419T	1	10.1	F	77	4	1	0	IV	cardia
GSM1523820	420	420T	1	23.7	M	64	3	1	0	III	cardia
GSM1523821	421	421T	0	71.1	M	64	4	1	0	IV	body
GSM1523822	422	422T	0	70.97	M	66	2	0	0	I	antrum
GSM1523823	423	423T	0	70.9	F	64	2	2	0	III	antrum
GSM1523824	424	424T	0	70.67	M	64	2	1	0	II	body
GSM1523825	425	425T	1	4	M	69	3	2	0	III	antrum
GSM1523826	426	426T	1	2.7	M	74	3	1	0	III	antrum
GSM1523827	427	427T	0	70.03	F	36	3	1	0	III	body
GSM1523828	428	428T	1	5.87	M	72	3	3	0	IV	antrum
GSM1523829	430	430T	0	69.83	M	68	2	0	0	II	antrum
GSM1523830	431	431T	1	53.43	M	59	2	1	0	II	antrum
GSM1523831	432	432T	1	30.9	M	68	2	1	1	IV	antrum
GSM1523832	433	433T	1	17.67	M	62	2	2	0	III	body
GSM1523833	437	437T	1	8.87	M	65	3	3	0	IV	antrum
GSM1523834	438	438T	1	44.57	F	66	3	1	0	III	body
GSM1523835	440	440 T	0	69.3	M	54	2	1	0	II	body
GSM1523836	441	441T	0	69.23	M	56	3	1	0	III	body
GSM1523837	442	442T	1	26.83	M	70	2	0	0	I	body
GSM1523838	443	443T	1	10.33	M	65	3	2	0	III	antrum
GSM1523839	444	444T	0	69.13	M	57	3	2	0	III	body
GSM1523840	445	445T	1	22.83	M	78	2	1	0	II	cardia
GSM1523841	446	446T	1	42.07	M	65	2	1	0	II	body
GSM1523842	447	447T	1	48.73	M	70	2	1	0	II	antrum
GSM1523843	448	448T	1	25.87	F	65	4	2	1	IV	antrum
GSM1523844	450	450T	0	68.9	M	54	3	2	0	III	antrum
GSM1523845	451	451T	1	9.67	F	77	3	3	0	IV	antrum
GSM1523846	455	455T	0	68.37	M	63	2	2	0	III	cardia
GSM1523847	456	456T	0	68.13	F	31	2	1	0	II	antrum
GSM1523848	457	457T	0	68.13	M	68	3	1	0	III	body
GSM1523849	459	459T	1	28.03	M	65	3	1	0	III	antrum
GSM1523850	460	460T	1	36.4	M	38	4	2	0	IV	body
GSM1523851	465	465T	0	67.23	F	77	2	0	0	I	antrum
GSM1523852	469	469T	1	31	M	55	3	1	0	III	antrum
GSM1523853	470	470T	0	66.73	M	68	2	0	0	I	antrum
GSM1523854	471	471T	0	66.73	M	69	2	1	0	II	antrum
GSM1523855	476	476T	1	21.93	M	77	2	2	0	III	body
GSM1523856	477	477T	0	66.2	F	51	2	1	0	II	antrum
GSM1523857	480	480T	1	14.43	F	75	3	2	0	III	antrum
GSM1523858	482	482T	1	17.1	F	42	2	0	0	I	fundus, body, antrum
GSM1523859	483	483T	0	53.13	M	67	2	1	0	II	body
GSM1523860	485	485T	1	42.2	M	66	2	0	0	I	antrum
GSM1523861	488	488T	0	64.8	M	64	2	0	0	I	body
GSM1523862	489	489T	1	21	M	41	3	3	0	IV	body
GSM1523863	493	493T	0	64.57	F	64	2	0	0	I	antrum
GSM1523864	501	501T	0	63.97	M	52	2	0	0	I	body
GSM1523865	502	502T	0	63.7	M	70	2	1	0	II	body
GSM1523866	503	503T	1	4.37	F	86	3	2	1	IV	antrum
GSM1523867	505	505T	1	33.27	M	54	2	2	0	III	antrum
GSM1523868	510	510T	0	63.27	M	62	3	2	0	III	body and antrum
GSM1523869	514	514T	0	62.53	F	67	2	1	0	II	body
GSM1523870	516	516T	0	62.47	M	75	2	1	0	II	antrum
GSM1523871	517	517T	0	62.37	F	70	2	1	0	II	antrum
GSM1523872	518	518T	1	15.03	F	61	4	3	1	IV	body
GSM1523873	519	519T	1	24.03	M	57	2	2	1	IV	cardia and body
GSM1523874	520	520T	0	62.1	F	72	2	0	0	I	antrum
GSM1523875	522	522T	1	8.47	M	79	2	1	0	II	body
GSM1523876	523	523T	0	61.9	M	76	2	0	0	I	antrum
GSM1523877	524	524T	1	13.1	M	65	2	2	0	III	body
GSM1523878	525	525T	0	61.87	M	56	2	1	0	II	cardia
GSM1523879	528	528T	0	61.17	M	63	3	3	0	IV	body
GSM1523880	529	529T	0	60.97	F	54	2	0	0	I	body
GSM1523881	532	532T	1	14.9	M	74	2	2	0	III	cardia
GSM1523882	533	533T	0	60.7	M	36	2	2	0	III	body
GSM1523883	534	534T	1	39.53	M	77	2	1	0	II	antrum
GSM1523884	538	538T	0	60.43	M	50	3	1	0	III	body
GSM1523885	540	540T	0	60.23	F	53	2	0	0	I	antrum
GSM1523886	541	541T	1	5.6	M	49	3	3	0	IV	body
GSM1523887	542	542T	0	60.2	M	46	2	0	0	I	antrum
GSM1523888	544	544T	0	59.9	M	52	2	0	0	I	antrum
GSM1523889	547	547T	0	59.67	M	74	2	0	0	I	cardia
GSM1523890	550	550T	0	59.57	F	33	3	2	0	III	cardia and body
GSM1523891	551	551T	0	59.57	F	53	2	0	0	I	antrum
GSM1523892	553	553T	0	59.47	M	59	2	0	0	I	antrum
GSM1523893	554	554T	1	20.1	M	74	2	0	0	I	body
GSM1523894	556	556T	1	35.77	M	56	2	0	0	I	body
GSM1523895	557	557T	0	59.03	M	66	2	0	0	I	antrum
GSM1523896	559	559T	1	28.03	M	51	2	1	0	II	body
GSM1523897	560	560T	0	58.87	F	78	2	0	0	I	antrum
GSM1523898	561	561T	0	58.83	M	60	2	0	0	I	antrum
GSM1523899	566	566T	0	58.07	F	60	2	1	0	II	cardia
GSM1523901	571	571T	0	57.47	F	65	2	0	0	I	antrum
GSM1523903	584	584T	1	39.8	M	60	4	0	0	III	body
GSM1523904	586	586T	0	55.37	M	56	2	3	0	IV	cardia
GSM1523905	588	588T	0	55.3	M	66	2	1	0	II	antrum
GSM1523906	589	589T	0	55.3	M	53	2	0	0	I	body
GSM1523908	592	592T	0	55.07	F	44	4	3	0	IV	body
GSM1523909	595	595T	0	54.53	M	74	2	1	0	II	antrum
GSM1523910	596	596T	0	54.33	M	53	3	1	0	III	body,antrum
GSM1523911	603	603T	1	21.83	F	72	3	3	0	IV	antrum
GSM1523918	207	Tr_207	1	28.13	M	62	3	2	0	III	antrum
GSM1523919	101	Tr_101	0	84.1	M	64	4	1	0	IV	body
GSM1523920	105	Tr_105	1	9.33	M	44	3	0	0	II	body
GSM1523921	106	Tr_106	0	83.3	M	42	2	1	0	II	antrum
GSM1523922	112	T112	1	23.6	M	65	2	1	0	II	body
GSM1523923	113	Tr_113	1	26.4	M	59	2	1	0	II
GSM1523924	114	Tr_114	0	82.2	M	52	2	1	0	II	body
GSM1523925	115	Tr_115	1	6.3	F	59	2	1	0	II	antrum
GSM1523926	116	Tr_116	0	69.03	M	69	①2/ ②1/ ③1	1	0	①II/ ②I/ ③I	cardia
GSM1523927	117	Tr_117	0	80.77	M	46	2	1	0	II	body
GSM1523928	118	Tr_118	1	54.13	M	69	2	1	0	II	cardia
GSM1523929	11	Tr_11	0	88.33	F	67	2	2	0	III	antrum
GSM1523930	121	Tr_121	0	78.53	M	51	2	1	0	II	antrum
GSM1523931	124	Tr_124	0	77.6	F	61	2	1	0	II	antrum
GSM1523932	128	Tr_128	1	12.67	F	66	2	1	0	II	antrum
GSM1523933	129	Tr_129	0	75.27	M	74	2	1	0	II	antrum
GSM1523934	12	T12	1	12.8	M	70	3	3	0	IV	body
GSM1523935	132	Tr_132	0	87.4	M	64	3	0	0	II	antrum
GSM1523936	133	Tr_133	1	17.57	M	70	2	1	0	II	antrum
GSM1523937	134	Tr_134	1	19.67	M	81	2	1	0	II	antrum
GSM1523938	135	Tr_135	1	5.77	F	53	3	3	0	IV	body
GSM1523939	136	Tr_136	1	11.23	F	28	3	3	0	IV	body
GSM1523940	137	Tr_137	1	20.03	M	69	3	3	0	IV	antrum
GSM1523941	138	Tr_138	1	4.53	M	70	2	3	0	IV	body
GSM1523942	139	Tr_139	0	70.27	M	70	①2/ ②1	2	0	①III/ ②II	antrum
GSM1523943	140	Tr_140	1	5.53	F	72	3	2	1	IV	cardia
GSM1523944	141	Tr_141	0	69.63	M	71	2	2	0	III	antrum
GSM1523945	142	Tr_142	1	17.53	M	53	4	3	0	IV	entire
GSM1523946	143	Tr_143	0	68.93	M	50	2	2	0	III	antrum
GSM1523947	144	Tr_144	0	68.43	F	74	3	0	0	II	antrum
GSM1523948	145	Tr_145	1	27.47	M	52	3	3	0	IV	body
GSM1523949	146	Tr_146	1	10.1	F	51	3	2	1	IV	body
GSM1523950	148	Tr_148	0	68.2	M	57	2	3	0	IV	antrum
GSM1523951	14	T14	1	53.03	M	66	4	2	1	IV	cardia
GSM1523952	150	Tr_150	0	100.87	F	54	2	1	0	II	antrum
GSM1523953	151	Tr_151	0	84.77	M	70	2	2	0	III	antrum
GSM1523954	152	Tr_152	0	100.87	M	62	2	1	0	II	antrum
GSM1523955	154	Tr_154	1	34.37	M	49	2	2	0	III	body
GSM1523956	155	Tr_155	1	31.13	M	76	2	1	0	II	body
GSM1523957	156	Tr_156	0	100.63	F	37	2	1	0	II	body
GSM1523958	157	Tr_157	0	100.23	M	56	2	1	0	II	body
GSM1523959	16	T16	1	17.43	M	54	2	3	0	IV	antrum
GSM1523960	171	Tr_171	0	99	F	70	2	1	0	II	body
GSM1523961	172	Tr_172	1	9.5	M	63	2	1	0	II	antrum
GSM1523962	173	Tr_173	1	20.13	M	48	3	2	0	III	body
GSM1523963	175	Tr_175	1	45.77	F	69	2	1	0	II	antrum
GSM1523964	177	Tr_177	0	98.53	M	61	2	1	0	II	body
GSM1523965	17	T17	1	11.47	M	52	3	3	0	IV	antrum
GSM1523966	180	Tr_180	1	51.8	M	35	2	3	0	IV	body
GSM1523967	182	Tr_182	0	98.47	M	52	2	2	0	III	cardia
GSM1523968	185	Tr_185	1	45.17	F	44	3	0	1	IV	entire
GSM1523969	186	Tr_186	1	17.9	M	69	3	1	0	III	antrum
GSM1523970	187	Tr_187	1	15.7	F	77	2	1	0	II	antrum
GSM1523971	188	Tr_188	1	13.3	F	45	3	1	0	III	cardia
GSM1523972	189	Tr_189	1	6.5	M	70	2	1	1	IV	antrum
GSM1523973	18	T18	0	87.27	M	62	2	2	0	III	antrum
GSM1523974	190	Tr_190	0	98.23	M	61	2	1	0	II	body
GSM1523975	192	Tr_192	1	7.2	M	67	3	1	0	III	antrum
GSM1523976	193	Tr_193	1	56	M	69	2	2	0	III	antrum
GSM1523977	197	Tr_197	1	1	M	63	2	1	0	II	antrum
GSM1523978	19	T19	1	16.23	F	67	2	3	0	IV	cardia
GSM1523979	1	Tr_1	1	9.43	M	78	3	2	0	III	antrum
GSM1523980	201	Tr_201	1	6.7	F	77	3	2	0	III	cardia
GSM1523981	202	Tr_202	0	97.2	M	51	2	1	0	II	antrum
GSM1523982	204	Tr_204	1	8.7	M	56	3	2	1	IV	antrum
GSM1523983	205	Tr_205	1	10.1	M	61	2	2	0	III	cardia
GSM1523984	206	Tr_206	0	96.97	M	57	2	1	0	II	antrum
GSM1523985	209	Tr_209	1	77.53	M	70	2	2	0	III	cardia
GSM1523986	20	T20	0	86.8	M	72	3	2	0	III	antrum
GSM1523987	212	Tr_212	1	18.27	F	30	3	2	0	III	body
GSM1523988	213	Tr_213	1	14.83	M	65	2	2	0	III	antrum
GSM1523989	21	T21	0	86.7	M	46	3	3	0	IV	body
GSM1523990	225	Tr_225	1	14.17	M	40	2	2	0	III	body
GSM1523991	226	Tr_226	0	95.2	F	63	2	1	0	II	antrum
GSM1523992	227	Tr_227	1	20.13	F	70	3	3	0	IV	antrum
GSM1523993	228	Tr_228	1	68.13	M	69	2	2	0	III	antrum
GSM1523994	22	T22	0	86.37	M	63	2	2	0	III	antrum
GSM1523995	236	Tr_236	1	6.37	M	82	2	2	0	III	cardia
GSM1523996	237	Tr_237	1	35.2	F	75	2	1	0	II	antrum
GSM1523997	238	Tr_238	1	25.2	F	72	4	3	0	IV	antrum
GSM1523998	23	T23	1	21.23	M	59	2	2	0	III	antrum
GSM1523999	240	Tr_240	0	93.87	M	66	2	1	0	II	body
GSM1524000	241	Tr_241	0	93.87	F	69	3	2	0	III	antrum
GSM1524001	246	Tr_246	0	93.63	M	58	2	1	0	II	body
GSM1524002	24	Tr_24	0	86.13	M	64	3	2	0	III	cardia
GSM1524003	25	T25	0	85.93	F	60	2	2	0	III	antrum
GSM1524004	26	T26	1	5.93	M	58	4	3	1	IV	body
GSM1524005	282	Tr_282	1	9.47	M	71	2	3	1	IV	antrum
GSM1524006	287	Tr_287	1	26.27	F	41	2	2	0	III	body
GSM1524007	288	Tr_288	1	10.37	F	48	3	1	1	IV	cardia
GSM1524008	28	T28	1	10.83	M	39	3	3	0	IV	antrum
GSM1524009	299	Tr_299	1	65	F	60	2	2	0	III	cardia
GSM1524010	29	T29	1	19.7	F	73	2	2	0	III	body
GSM1524011	301	Tr_301	0	90.2	F	63	2	1	0	II	antrum
GSM1524012	30	T30	0	85.23	M	64	3	1	0	III	antrum
GSM1524013	311	Tr_311	0	89.9	M	63	2	1	0	II	body
GSM1524014	318	Tr_318	1	11.33	F	66	4	3	1	IV	antrum
GSM1524015	319	Tr_319	1	24.87	M	61	4	1	0	IV	antrum
GSM1524016	31	T31	1	27.8	M	24	3	3	1	IV	body
GSM1524017	32	T32	0	85.03	M	67	2	2	0	III	antrum
GSM1524018	33	Tr_33	0	84.77	M	64	3	1	0	III	antrum
GSM1524019	34	T34	1	8.33	M	70	3	3	0	IV	body
GSM1524020	35	Tr_35	0	84.3	M	51	2	2	0	III	body
GSM1524021	36	T36	1	12.93	F	56	3	1	0	III	body
GSM1524022	38	T38	1	8.03	F	65	3	3	0	IV	body
GSM1524023	39	Tr_39	0	83.83	F	77	4	2	0	IV	antrum
GSM1524024	3	Tr_3	1	89.43	M	61	3	2	0	III	antrum
GSM1524025	41	Tr_41	1	81.83	M	71	2	2	0	III	antrum
GSM1524026	42	T42	0	83.6	F	52	3	1	0	III	body
GSM1524027	45	T45	1	59.7	M	61	3	2	0	III	body
GSM1524028	47	T47	1	47.7	M	72	2	2	0	III	body
GSM1524029	49	T49	1	31.1	F	50	4	3	0	IV	body
GSM1524030	4	T4	1	31.33	F	46	3	1	0	III	cardia
GSM1524031	50	T50	0	82	M	55	2	3	0	IV	antrum
GSM1524032	51	Tr_51	1	77.2	F	70	4	1	0	IV	antrum
GSM1524033	52	Tr_52	0	80.83	F	67	2	2	1	IV	body
GSM1524034	53	Tr_53	1	44.07	M	65	3	1	0	III	body
GSM1524035	54	Tr_54	0	80.3	F	64	3	3	0	IV	body
GSM1524036	55	T55	0	79.93	M	70	3	1	0	III	body
GSM1524037	56	T56	1	23.43	M	72	3	2	0	III	antrum
GSM1524038	57	T57	1	8.63	M	74	2	3	1	IV	entire
GSM1524039	58	T58	1	12.07	M	72	3	2	0	III	antrum
GSM1524040	60	T60	1	36.17	F	55	3	3	0	IV	antrum
GSM1524041	61	T61	0	77.33	M	56	2	3	1	IV	body
GSM1524042	62	T62	1	10.83	F	62	2	2	0	III	cardia
GSM1524043	63	T63	1	16.83	M	60	2	2	1	IV	body
GSM1524044	64	Tr_64	1	22.87	M	80	2	1	1	IV	antrum
GSM1524045	68	Tr_68	0	89.13	M	33	2	1	0	II	body
GSM1524046	75	Tr_75	0	88.03	F	59	2	1	0	II	antrum
GSM1524047	77	Tr_77	0	69.87	M	74	2	1	0	II	antrum
GSM1524048	78	Tr_78	1	46.8	M	67	2	1	0	II	antrum
GSM1524049	79	Tr_79	0	87.8	M	62	2	1	0	II	body
GSM1524050	80	Tr_80	1	57.13	M	66	2	1	0	II	antrum
GSM1524051	81	Tr_81	0	87.27	F	51	2	1	0	II	antrum
GSM1524052	83	Tr_83	1	13.17	M	74	2	1	0	II	antrum
GSM1524053	84	Tr_84	0	86.93	M	61	2	1	0	II	body
GSM1524054	85	Tr_85	0	86.57	M	72	2	1	0	II	antrum
GSM1524055	86	Tr_86	1	37.93	M	54	2	1	0	II	antrum
GSM1524056	88	Tr_88	1	14.17	M	71	2	1	0	II	body
GSM1524057	90	Tr_90	1	15.93	M	80	4	0	0	IV	antrum
GSM1524058	91	Tr_91	0	85.47	F	56	2	1	0	II	cardia
GSM1524059	93	Tr_93	0	85.2	M	58	3	0	0	II	antrum
GSM1524060	96	Tr_96	0	84.83	M	56	2	1	0	II	body
GSM1524061	97	Tr_97	0	84.6	M	77	2	1	0	II	antrum
GSM1524062	9	T9	1	70.2	F	40	3	1	0	III	cardia
GSM1524068	82		0	92.87	F	71	2	1	0	II	body
GSM1524069	87		1	85.6	M	63	2	1	0	II	antrum
GSM1524070	89		0	91.63	M	58	2	1	0	II	body
GSM1524071	94		0	90.77	M	60	4	1	0	III	antrum to body
GSM1524072	95		1	42.93	F	43	3	2	1	IV	antrum to body

## Sheet: S4
Supplementary Table S4. Datasets in use
	Clinical stages						Lauran classification			WHO classification					T classification				N classification				M classification
Dataset	Tumor	Normal	Stage Ⅰ	Stage Ⅱ	Stage Ⅲ	Stage Ⅳ	mixed subtypes	intestinal type	diffuse type	mixed subtypes	Mucinous adenocarcinoma	Papillary adenocarcinoma	Signet ring cell carcinoma	Tubular adenocarcinoma	T1	T2	T3	T4	N0	N1	N2	N3	M0	M1
TCGA target GTEx	414	212	58	121	132	41	2	76	63	2	20	7	13	69	15	72	160	98	110	94	69	72	324	21
GSE15459	200		31	29	72	60	18	99	75	18
GSE66229	300	100	30	96	95	77	19	146	135	19		8	45	151	0	186	91	21	38	130	79	51	271	27

## Sheet: S5
Supplementary Table S5. The remaining genes of each step
Tumor site	EdgeR	WGCNA	Cytoscape	LASSO
Cardiac	2381	69	25	6
fundus/corpus	2487	54	25	4
pyloric	2431	307	25	3

## Sheet: S6
Supplementary Table S6. Top25 genes selected by Cytoscape
Cardia	Fundus/Corpus	Pyloric
APOB	VCAN	ABCA6
APOA4	COL1A2	CTSF
MS4A10	FAP	GOLGA8N
SLC28A1	PODNL1	IL11RA
AQP10	SULF1	ECHDC2
FABP2	COL1A1	CSAD
ALPI	LUM	SNRNP70
OTOP3	CTHRC1	CENPT
ASAH2	ITGA11	NFATC4
MEP1B	INHBA	GABBR1
MGAM	OLFML2B	LCAT
ALDOB	ADAMTS12	SLC25A27
SLC5A4	BGN	AMT
CYP3A4	ADAM12	IFFO1
ZG16	COL10A1	PTH1R
CEACAM20	THBS2	GSTM2
MTTP	COL8A1	SRSF5
UGT1A4	BMP8A	LENG8
TMPRSS15	CPXM1	ZMAT1
BEST4	ZNF469	CCNL2
SLC2A7	TIMP1	TMEM178A
TREH	MFAP2	TSNAXIP1
CYP4F2	COL3A1	KIAA0895L
LCT	SFRP4	ARMCX4
MS4A18	COL11A1	C3orf18

## Sheet: S7
Supplementary Table S7. LASSO coefficients
gene	coef2	pvalue
ABCA6	0.0666978	2.6e-80
CTSF	0.0137921	1.93e-16
VCAN	0.0919976	3.48e-100
APOB	0.0200551	1.64e-10

## Sheet: S8
Supplementary Table S8. TCGA-STAD database with PRGS groups
sample	ABCA6	CTSF	VCAN	APOB	fp	PRGSscore	OS_MONTHS	OS_STATUS	PRGS_group
TCGA_3M_AB46_01	22.4741	457.825	8163.22	1.66475	0.170089	0.170089	1765	0	low
TCGA_B7_5816_01	129.066	659.585	36798.5	41.4384	0.681802	0.681802	812	0	high
TCGA_B7_5818_01	2.08122	152.969	3872.17	1.04061	0.0731932	0.0731932	356	0	low
TCGA_B7_A5TI_01	176.749	462.556	15856.7	2.99584	0.349949	0.349949	595	0	high
TCGA_B7_A5TJ_01	37.8112	252.51	3520.07	5.12708	0.0873843	0.0873843	335	0	low
TCGA_B7_A5TK_01	121.931	669.782	7578.57	219.678	0.213454	0.213454	288	0	low
TCGA_B7_A5TN_01	163.324	1510.64	22888.5	22.7277	0.529078	0.529078	287	0	high
TCGA_BR_4187_01	1048.22	1241.04	42982.6	1773.38	1.17199	1.17199	141	1	high
TCGA_BR_4191_01	660.96	1141.99	10264.4	2041.61	0.502375	0.502375	558	1	high
TCGA_BR_4201_01	459.833	753.826	22806.2	32.6655	0.584601	0.584601	940	1	high
TCGA_BR_4253_01	59.3424	181.823	5532.97	150.881	0.124061	0.124061	124	1	low
TCGA_BR_4255_01	715.946	1458.57	16931.8	162.522	0.633001	0.633001	124	1	high
TCGA_BR_4256_01	476.547	790.694	22861.6	64.2814	0.594388	0.594388	284	1	high
TCGA_BR_4257_01	50.7756	270.593	16442.2	4.95376	0.300359	0.300359	294	1	high
TCGA_BR_4267_01	84.5265	3336.84	8867.66	94.049	0.400425	0.400425	188	1	high
TCGA_BR_4279_01	647.337	978.159	28085.7	73.0332	0.753193	0.753193	291	1	high
TCGA_BR_4280_01	16.8679	70.8442	2357.58	16.3048	0.0488881	0.0488881	201	1	low
TCGA_BR_6452_01	49.6784	242.639	8935.54	13.596	0.177881	0.177881	1055	0	low
TCGA_BR_6453_01	239.601	1141.68	4555.47	170.136	0.239526	0.239526	485	0	low
TCGA_BR_6455_01	90.8877	280.482	5157.73	9.47951	0.134921	0.134921	422	1	low
TCGA_BR_6456_01	181.43	1676.85	23338.7	10.1982	0.554066	0.554066	526	1	high
TCGA_BR_6457_01	382.398	2485.15	19503.2	125.15	0.621908	0.621908	416	0	high
TCGA_BR_6458_01	250.288	1421.59	20619.6	11.5342	0.518295	0.518295	588	1	high
TCGA_BR_6563_01	465.004	2805.2	15101.5	662.89	0.608337	0.608337	1190	0	high
TCGA_BR_6564_01	232.795	3425.45	5354.85	932.367	0.412165	0.412165	794	1	high
TCGA_BR_6565_01	156.368	624.818	11418.4	12.4833	0.282521	0.282521	279	1	high
TCGA_BR_6566_01	24.6627	715.985	10538.4	593.486	0.232062	0.232062	997	0	low
TCGA_BR_6705_01	592.827	2129.98	26471.4	71.6203	0.785667	0.785667	779	1	high
TCGA_BR_6706_01	347.714	1106.66	16957.3	47.1946	0.474105	0.474105	549	1	high
TCGA_BR_6707_01	94.6239	317.048	3519.34	0	0.11243	0.11243	605	1	low
TCGA_BR_6709_01	815.665	1554.65	21474.4	5.82628	0.747194	0.747194	370	1	high
TCGA_BR_6710_01	116.507	1759.29	3270.87	17.4762	0.214554	0.214554	273	0	low
TCGA_BR_6801_01	52.4975	405.75	10129.4	99.6567	0.209927	0.209927	1223	0	low
TCGA_BR_6802_01	42.4083	226.465	5683.04	1.69634	0.121912	0.121912	940	0	low
TCGA_BR_6803_01	252.475	2327.52	8583.99	68.4836	0.388344	0.388344	949	0	high
TCGA_BR_6852_01	212.412	474.928	18521.6	133.653	0.407724	0.407724	1367	0	high
TCGA_BR_7196_01	532.927	1174.29	21007.7	36.5437	0.611045	0.611045	666	0	high
TCGA_BR_7197_01	39.7972	390.346	4790.63	18.6288	0.117953	0.117953	280	0	low
TCGA_BR_7703_01	51.1936	204.273	1755.64	68.5896	0.0613214	0.0613214	1100	0	low
TCGA_BR_7704_01	49.7734	788.065	3120.02	2.26232	0.121686	0.121686	1072	0	low
TCGA_BR_7707_01	13.3631	135.117	5278.55	21.5288	0.0988203	0.0988203	1090	0	low
TCGA_BR_7715_01	66.0609	1994.04	11363.1	12.7866	0.341697	0.341697	1023	0	high
TCGA_BR_7716_01	91.3474	2210.95	4940.04	8072.62	0.338878	0.338878	1210	0	high
TCGA_BR_7717_01	34.217	526.088	6205.65	25.6636	0.147873	0.147873	552	1	low
TCGA_BR_7722_01	522.701	1087.63	6527.79	2.11191	0.369127	0.369127	466	1	high
TCGA_BR_7723_01	156.794	1056.25	13056.6	37180.6	0.689287	0.689287	874	1	high
TCGA_BR_7851_01	79.3764	281.714	10118.8	19.0052	0.210376	0.210376	574	1	low
TCGA_BR_7901_01	245.561	3404.38	16871.7	98.8022	0.592023	0.592023	105	1	high
TCGA_BR_7957_01	722.977	1826.68	32066	161.163	0.903013	0.903013	276	1	high
TCGA_BR_7958_01	87.8192	277.146	12057	3.42139	0.244048	0.244048	899	0	low
TCGA_BR_7959_01	417.911	909.995	38403.8	208.964	0.831466	0.831466	1010	0	high
TCGA_BR_8058_01	268.717	833.056	18640.1	69.6247	0.453879	0.453879	1133	0	high
TCGA_BR_8059_01	152.564	1452.59	13990.9	28.2061	0.378716	0.378716	439	1	high
TCGA_BR_8060_01	376.439	4071.5	9413.7	40.5881	0.565041	0.565041	348	1	high
TCGA_BR_8077_01	79.6331	360.437	4260.07	3127.38	0.151315	0.151315	21	0	low
TCGA_BR_8078_01	101.076	407.644	16091.5	398.707	0.326116	0.326116	900	0	high
TCGA_BR_8080_01	650.039	854.96	16069.2	71.1886	0.553281	0.553281	292	1	high
TCGA_BR_8081_01	181.823	570.338	15385.7	370.006	0.355041	0.355041	981	0	high
TCGA_BR_8284_01	291.704	469.614	15821.6	26.4455	0.392017	0.392017	245	1	high
TCGA_BR_8286_01	188.375	1310.86	8802.73	13.2966	0.298895	0.298895	895	0	high
TCGA_BR_8289_01	268.642	1930.36	9454.25	45.6466	0.380992	0.380992	81	1	high
TCGA_BR_8291_01	929.137	1817.08	38805.2	28.0064	1.08427	1.08427	607	1	high
TCGA_BR_8295_01	116.19	1628.26	3804.31	85859.1	1.02488	1.02488	67	1	high
TCGA_BR_8296_01	619.721	1164.96	13607.3	18.1093	0.523336	0.523336	474	1	high
TCGA_BR_8297_01	200.035	1523.9	6393.87	115.687	0.279993	0.279993	225	0	high
TCGA_BR_8361_01	39.2523	127.107	3743.35	0.623154	0.082927	0.082927	946	0	low
TCGA_BR_8362_01	766.381	1219.37	30372	153.13	0.850381	0.850381	398	1	high
TCGA_BR_8363_01	194.524	403.417	16771.4	29.705	0.367321	0.367321	8	1	high
TCGA_BR_8364_01	837.635	2055.68	21178.8	118.015	0.785561	0.785561	675	0	high
TCGA_BR_8365_01	676.84	2503.66	11626.9	264.819	0.605698	0.605698	533	1	high
TCGA_BR_8366_01	367.904	827.295	28187.1	26.848	0.642211	0.642211	29	0	high
TCGA_BR_8367_01	1584.26	1385.28	18285.6	1119.17	0.975463	0.975463	801	1	high
TCGA_BR_8368_01	65.7456	154.848	2899.93	2.59527	0.0809812	0.0809812	131	0	low
TCGA_BR_8369_01	642.234	1081.16	4346.89	218.306	0.37939	0.37939	427	0	high
TCGA_BR_8371_01	536.902	3609.79	1835.45	309.016	0.473338	0.473338	359	1	high
TCGA_BR_8372_01	115.13	342.532	2980.87	10.4661	0.113113	0.113113	951	0	low
TCGA_BR_8373_01	183.132	2039.07	18790.6	24267.5	0.735542	0.735542	450	0	high
TCGA_BR_8380_01	393.177	1837.1	12887.5	1833.41	0.491971	0.491971	21	1	high
TCGA_BR_8381_01	224.362	483.717	17057.5	139.927	0.389283	0.389283	224	0	high
TCGA_BR_8382_01	32.1744	283.148	10365.2	1.28707	0.197036	0.197036	762	1	low
TCGA_BR_8384_01	1164.39	2062.25	13299.6	139.108	0.779162	0.779162	113	0	high
TCGA_BR_8483_01	47.6174	555.215	15774.5	0	0.307796	0.307796	164	0	high
TCGA_BR_8484_01	305.13	1262.58	7808.96	46.6664	0.322596	0.322596	766	1	high
TCGA_BR_8485_01	154.255	446.362	14912.2	10369.5	0.423427	0.423427	280	0	high
TCGA_BR_8487_01	74.5102	410.315	5647.3	4.08272	0.145558	0.145558	34	0	low
TCGA_BR_8588_01	135.306	570.061	15738.5	36.0294	0.340552	0.340552	389	0	high
TCGA_BR_8589_01	73.3108	119.126	1561.24	2.29094	0.0598648	0.0598648	825	0	low
TCGA_BR_8590_01	789.488	1069.23	18265.3	1410.29	0.66653	0.66653	284	1	high
TCGA_BR_8591_01	69.0639	279.178	7574.37	11.1864	0.165604	0.165604	856	0	low
TCGA_BR_8592_01	809.462	1758.68	12148.4	3927.6	0.646424	0.646424	191	1	high
TCGA_BR_8676_01	5.48362	72.6544	356.475	5.48362	0.0126976	0.0126976	229	0	low
TCGA_BR_8677_01	639.387	796.865	13671.6	41.4502	0.506758	0.506758	813	0	high
TCGA_BR_8678_01	93.0398	1908.92	9074.11	12.7171	0.309084	0.309084	754	0	high
TCGA_BR_8680_01	52.8211	272.16	4281.09	5.37135	0.106388	0.106388	972	0	low
TCGA_BR_8682_01	677.357	877.623	7310.74	362.145	0.427217	0.427217	991	0	high
TCGA_BR_8683_01	312.408	540.268	19808.4	15467	0.614079	0.614079	300	1	high
TCGA_BR_8686_01	759.709	553.483	3997.1	253.885	0.38113	0.38113	635	1	high
TCGA_BR_8687_01	88.375	2576.76	7876.93	79.6499	0.334195	0.334195	250	1	high
TCGA_BR_8690_01	237.344	588.603	10882.1	31.6452	0.301186	0.301186	325	0	high
TCGA_BR_A44T_01	362.9	1715.79	2063.1	91.7194	0.282824	0.282824	1038	0	high
TCGA_BR_A44U_01	68.2912	373.988	8307.08	4.06513	0.183433	0.183433	422	1	low
TCGA_BR_A452_01	36.1322	444.815	3977.48	3.3226	0.107144	0.107144	229	1	low
TCGA_BR_A453_01	443.118	3025.01	7897.16	202.502	0.495517	0.495517	185	1	high
TCGA_BR_A4CS_01	636.552	295.708	5651.6	68.4739	0.343456	0.343456	45	1	high
TCGA_BR_A4IU_01	645.139	1944.74	8732.84	56.5802	0.507841	0.507841	838	0	high
TCGA_BR_A4IV_01	381.469	2762.35	14871.9	178.097	0.5667	0.5667	869	1	high
TCGA_BR_A4IY_01	164.731	978.092	25536	14.3238	0.535755	0.535755	392	0	high
TCGA_BR_A4IZ_01	337.31	1948.38	37428.8	51.1863	0.855484	0.855484	273	1	high
TCGA_BR_A4J1_01	53.5459	683.023	8410.22	3333.84	0.232148	0.232148	22	1	low
TCGA_BR_A4J2_01	768.192	1125.63	23054.1	40.3725	0.726373	0.726373	431	0	high
TCGA_BR_A4J4_01	86.5721	253.108	10489.5	14.5388	0.216954	0.216954	16	0	low
TCGA_BR_A4J5_01	271.649	1473.69	20075.2	13.7536	0.520925	0.520925	862	0	high
TCGA_BR_A4J6_01	311	607.958	5891.65	4.09224	0.249156	0.249156	20	0	low
TCGA_BR_A4J7_01	612.492	2547.27	5341.87	119.643	0.483128	0.483128	989	0	high
TCGA_BR_A4J8_01	127.266	864.386	9324.72	27.1332	0.254774	0.254774	411	0	low
TCGA_BR_A4J9_01	287.375	2017.68	5964.8	343.605	0.340667	0.340667	14	0	high
TCGA_BR_A4PD_01	35.0818	1451.78	6676.54	398.403	0.222127	0.222127	628	0	low
TCGA_BR_A4PE_01	44.5633	209.328	7576.99	6.95025	0.151926	0.151926	621	0	low
TCGA_BR_A4PF_01	96.9111	115.437	8048.03	271.252	0.174685	0.174685	35	0	low
TCGA_BR_A4QI_01	46.8949	1372.65	3440.69	22.7903	0.165673	0.165673	652	1	low
TCGA_BR_A4QL_01	23.7662	86.4811	2818.65	7.9222	0.0597738	0.0597738	491	1	low
TCGA_BR_A4QM_01	99.5521	268.679	4692.02	72.7924	0.130417	0.130417	156	0	low
TCGA_CD_5798_01	101.708	1721.28	9124.58	120.339	0.301326	0.301326	408	0	high
TCGA_CD_5799_01	19.7969	431.873	6033.84	22.7293	0.133434	0.133434	396	0	low
TCGA_CD_5800_01	10.8877	2077.03	1897.44	1531.85	0.189911	0.189911	400	0	low
TCGA_CD_5801_01	32.1951	160.972	3070.02	0	0.0718599	0.0718599	401	1	low
TCGA_CD_5803_01	374.899	1370.56	12527.3	32.2596	0.430832	0.430832	341	1	high
TCGA_CD_5813_01	646.753	2340.31	27674.1	71.7412	0.838891	0.838891	377	1	high
TCGA_CD_8524_01	284.234	681.791	14576.9	76.2092	0.384233	0.384233	388	0	high
TCGA_CD_8525_01	86.7058	467.044	5489.8	149.133	0.152706	0.152706	383	0	low
TCGA_CD_8526_01	153.13	2145.84	5172.77	591.224	0.290056	0.290056	381	0	high
TCGA_CD_8527_01	56.9726	1077.87	3525.2	28.4848	0.150735	0.150735	218	1	low
TCGA_CD_8528_01	48.9669	228.906	10208.3	42.4776	0.197353	0.197353	375	0	low
TCGA_CD_8529_01	162.869	1387.1	10867	5644.56	0.38103	0.38103	374	0	high
TCGA_CD_8530_01	468.506	1289.93	13420	57.8104	0.474042	0.474042	377	0	high
TCGA_CD_8531_01	97.7973	175.57	4104.38	3.08009	0.11338	0.11338	383	0	low
TCGA_CD_8532_01	183.938	542.336	6801.74	5.40989	0.212946	0.212946	354	1	low
TCGA_CD_8533_01	137.17	197.638	7131.54	4966.83	0.224621	0.224621	468	0	low
TCGA_CD_8534_01	280.229	671.038	3851.02	14.0584	0.209619	0.209619	367	0	low
TCGA_CD_8535_01	54.116	2042.6	5742.84	7.17206	0.250545	0.250545	390	0	low
TCGA_CD_8536_01	32.6679	179.143	5523.39	13.1723	0.112696	0.112696	378	0	low
TCGA_CD_A486_01	66.3357	1630.52	10827.9	1035.35	0.31819	0.31819	192	1	high
TCGA_CD_A489_01	316.739	1822.38	17786.8	139.06	0.525576	0.525576	344	1	high
TCGA_CD_A48A_01	288.617	810.98	4420.13	58.4333	0.23172	0.23172	378	0	low
TCGA_CD_A48C_01	140.445	451.947	13265.5	11.2363	0.294551	0.294551	353	1	high
TCGA_CD_A4MG_01	52.5643	372.38	9158.16	1.48062	0.191198	0.191198	200	1	low
TCGA_CD_A4MH_01	103.019	1348.02	4918.17	2287.68	0.229534	0.229534	371	0	low
TCGA_CD_A4MI_01	289.36	810.755	10702.5	12.5132	0.33219	0.33219	358	1	high
TCGA_CD_A4MJ_01	24.9417	338.837	11150.1	0	0.210743	0.210743	384	0	low
TCGA_CG_4301_01	238.869	475.027	16792.3	38.4622	0.388778	0.388778	92	0	high
TCGA_CG_4305_01	473.775	394.408	15057.6	1543.69	0.45541	0.45541	485	0	high
TCGA_CG_4306_01	202.446	218.306	10416.3	5.7118	0.255599	0.255599	1	1	low
TCGA_CG_4436_01	18.8518	98.519	2217.24	5.47329	0.0491409	0.0491409	243	0	low
TCGA_CG_4437_01	64.1097	461.401	6901.01	0.9029	0.165289	0.165289	245	0	low
TCGA_CG_4438_01	141.815	359.186	19371.2	414.038	0.390372	0.390372	1645	0	high
TCGA_CG_4440_01	57.4123	241.409	16592.1	125.203	0.304336	0.304336	122	1	high
TCGA_CG_4441_01	109.14	439.775	12812.7	130.207	0.276176	0.276176	426	1	high
TCGA_CG_4443_01	119.384	1551.2	5906.78	14.239	0.243668	0.243668	912	0	low
TCGA_CG_4444_01	222.991	289.481	7752.33	3568.48	0.2589	0.2589	1431	0	low
TCGA_CG_4449_01	251.896	616.973	22790.4	7.59144	0.498971	0.498971	580	0	high
TCGA_CG_4460_01	134.064	1406.87	4495.85	1464.32	0.230312	0.230312	669	1	low
TCGA_CG_4465_01	73.9367	217.638	14206.8	3342.63	0.300925	0.300925	274	1	high
TCGA_CG_4466_01	149.248	125.817	4450.88	44.4057	0.134709	0.134709	577	0	low
TCGA_CG_4469_01	52.6014	475.688	3317.69	4.57395	0.10469	0.10469	215	1	low
TCGA_CG_4472_01	564.35	787.136	8915.74	28.2893	0.402412	0.402412	365	0	high
TCGA_CG_4475_01	201.517	890.691	22915.5	1549.59	0.515756	0.515756	699	0	high
TCGA_CG_4477_01	412.86	428.436	10922.9	1329.08	0.367235	0.367235	942	0	high
TCGA_CG_5717_01	168.495	418.492	2232.05	2.35102	0.125664	0.125664	212	1	low
TCGA_CG_5718_01	38.3175	586.767	1794.16	8265.15	0.16064	0.16064	1095	1	low
TCGA_CG_5719_01	157.606	2291.17	14813.3	61.7525	0.451005	0.451005	31	0	high
TCGA_CG_5720_01	96.1674	294.559	4504.9	940.815	0.136141	0.136141	30	1	low
TCGA_CG_5721_01	60.606	383.409	4168.62	9.22267	0.115018	0.115018	183	0	low
TCGA_CG_5722_01	64.7537	438.799	2251.95	2.89953	0.0895273	0.0895273	30	0	low
TCGA_CG_5723_01	67.1197	744.157	3057.69	120.625	0.125151	0.125151	2496	0	low
TCGA_CG_5724_01	78.9486	606.525	12054.5	30.0754	0.263396	0.263396	366	1	high
TCGA_CG_5725_01	10.5779	8925.01	2607.85	0.813655	0.651837	0.651837	457	1	high
TCGA_CG_5726_01	5.19283	88.276	735.938	0.741825	0.019687	0.019687	881	1	low
TCGA_CG_5732_01	93.6742	1227	1597.5	64.982	0.143713	0.143713	2100	1	low
TCGA_CG_5734_01	62.4171	373.183	2740.98	1543.15	0.106601	0.106601	243	1	low
TCGA_D7_5577_01	63.9654	224.299	4564.95	2.49211	0.111723	0.111723	782	1	low
TCGA_D7_5578_01	104.23	458.461	5152.01	1409.9	0.165012	0.165012	385	0	low
TCGA_D7_6518_01	399.761	2218.16	10491.7	116.474	0.465655	0.465655	582	0	high
TCGA_D7_6519_01	46.6697	1067.67	30496.4	84.0064	0.578904	0.578904	625	0	high
TCGA_D7_6520_01	102.279	3579.14	8089.43	6.68529	0.410064	0.410064	573	0	high
TCGA_D7_6521_01	191.458	1101.91	16672.9	340.916	0.415006	0.415006	564	0	high
TCGA_D7_6522_01	331.29	2111.59	13050.2	69.7471	0.47399	0.47399	566	0	high
TCGA_D7_6524_01	145.921	917.541	26022	3.87398	0.532469	0.532469	543	0	high
TCGA_D7_6525_01	55.5557	554.214	9118.25	11.3788	0.204094	0.204094	406	1	low
TCGA_D7_6526_01	103.38	547.292	4702.76	40.5392	0.150604	0.150604	523	0	low
TCGA_D7_6527_01	43.7899	1915.56	3211.77	18.3117	0.197705	0.197705	312	1	low
TCGA_D7_6528_01	7.67281	930.105	4367.74	335.882	0.139118	0.139118	463	0	low
TCGA_D7_6815_01	133.718	822.657	16640.5	2066.83	0.390762	0.390762	486	0	high
TCGA_D7_6817_01	357.493	650.4	9371.38	39.3697	0.325078	0.325078	389	0	high
TCGA_D7_6818_01	168.813	1692.98	22377.1	623.778	0.540949	0.540949	376	1	high
TCGA_D7_6820_01	13.0676	1066.71	1294.33	6.19004	0.098012	0.098012	344	0	low
TCGA_D7_6822_01	50.8366	1548.73	11357.6	34.1219	0.306011	0.306011	375	0	high
TCGA_D7_8570_01	176.38	352.753	15555.2	3.99055	0.337535	0.337535	752	0	high
TCGA_D7_8572_01	443.118	1134.65	29574.2	11090	0.817237	0.817237	511	0	high
TCGA_D7_8573_01	111.377	135.334	5717.42	5.9881	0.14147	0.14147	593	0	low
TCGA_D7_8574_01	567.415	1034.56	17057.5	194.375	0.552339	0.552339	523	0	high
TCGA_D7_8575_01	676.182	1651.69	8326.69	113.381	0.49329	0.49329	554	1	high
TCGA_D7_8576_01	136.721	734.356	9555.72	225.788	0.254968	0.254968	446	1	low
TCGA_D7_8578_01	403.081	1592.63	31620.1	28811.4	1.0339	1.0339	643	0	high
TCGA_D7_8579_01	514.919	1222.67	9259.02	1163.67	0.430187	0.430187	636	0	high
TCGA_D7_A4YT_01	118.478	454.245	15556.3	16.9262	0.323448	0.323448	434	0	high
TCGA_D7_A4YU_01	269.615	305.831	5110.04	26.7401	0.201233	0.201233	500	0	low
TCGA_D7_A4YV_01	285.402	276.896	6243.63	7.09988	0.223001	0.223001	180	1	low
TCGA_D7_A4YX_01	79.2929	132.158	4095	0	0.103503	0.103503	1108	0	low
TCGA_D7_A4YY_01	138.624	246.606	16307.1	2.43188	0.328585	0.328585	419	0	high
TCGA_D7_A4Z0_01	199.367	850.758	8785.67	146.064	0.272634	0.272634	449	0	high
TCGA_D7_A6EV_01	17.7381	330.37	2132.64	0.554338	0.0630802	0.0630802	342	0	low
TCGA_D7_A6EX_01	61.8569	3345.88	5443.56	25.3768	0.337265	0.337265	344	0	high
TCGA_D7_A6EY_01	178.06	297.007	5204.78	11.396	0.168612	0.168612	348	1	low
TCGA_D7_A6EZ_01	64.3131	160.523	6935.06	0	0.145465	0.145465	618	1	low
TCGA_D7_A6F0_01	30.9557	1154.82	3077.26	9720.75	0.230842	0.230842	678	0	low
TCGA_D7_A6F2_01	116.263	642.189	5977.63	74.1239	0.18249	0.18249	476	0	low
TCGA_D7_A747_01	491.063	2842.2	10597.7	571.051	0.547334	0.547334	255	1	high
TCGA_D7_A748_01	498.105	1219.62	42724.2	8.0769	0.949065	0.949065	132	1	high
TCGA_D7_A74A_01	26.6901	97.4146	786.753	0.667169	0.0289622	0.0289622	607	0	low
TCGA_EQ_8122_01	90.0382	1018.11	6710.41	44.1358	0.209914	0.209914	243	1	low
TCGA_EQ_A4SO_01	10.8318	331.867	1469.92	143.768	0.0513983	0.0513983	494	0	low
TCGA_F1_6874_01	136.301	809.462	26087	597.953	0.528272	0.528272	440	0	high
TCGA_F1_6875_01	41.1833	4013.77	2462.17	0.686345	0.327091	0.327091	2197	1	high
TCGA_F1_A448_01	177.998	442.657	10105.5	57.3314	0.257428	0.257428	647	0	low
TCGA_F1_A72C_01	104.624	389.858	11682.6	1638.8	0.267283	0.267283	346	0	high
TCGA_FP_7735_01	32.975	1327.7	2637.31	2006.1	0.163405	0.163405	106	1	low
TCGA_FP_7829_01	36.5567	184.4	8966.56	9.74803	0.1696	0.1696	594	0	low
TCGA_FP_7916_01	344.849	600.825	12666.1	111.408	0.370563	0.370563	428	1	high
TCGA_FP_7998_01	382.159	513.847	9987.83	43.6937	0.334717	0.334717	678	0	high
TCGA_FP_8099_01	109.745	549.462	14850.3	1.44392	0.315273	0.315273	519	0	high
TCGA_FP_8209_01	980.334	2632.56	15365.5	111.509	0.783599	0.783599	1811	1	high
TCGA_FP_8210_01	555.794	1658.12	11436.6	26.6901	0.49882	0.49882	153	1	high
TCGA_FP_8211_01	38.6651	2575.15	1462.8	15.9993	0.212595	0.212595	413	0	low
TCGA_FP_8631_01	282.597	807.442	14486.3	136.254	0.391285	0.391285	17	0	high
TCGA_FP_A4BE_01	25.9797	174.193	4337.56	0	0.0907976	0.0907976	337	0	low
TCGA_FP_A4BF_01	456.84	673.792	36995.5	6.64226	0.805149	0.805149	168	1	high
TCGA_FP_A8CX_01	158.245	268.511	2090.03	2540.39	0.133435	0.133435	7	0	low
TCGA_FP_A9TM_01	144.856	252.809	1678.25	41.5179	0.0972858	0.0972858	189	0	low
TCGA_HF_7132_01	119.259	746.329	7467.49	4.73264	0.213869	0.213869	2351	0	low
TCGA_HF_7133_01	79.7897	2965.41	6712.27	28.7765	0.338322	0.338322	1918	0	high
TCGA_HF_7134_01	17.7199	177.787	3030.68	3.54412	0.0671254	0.0671254	1588	0	low
TCGA_HF_A5NB_01	10.9646	476.945	2292.29	0.843439	0.0731254	0.0731254	928	0	low
TCGA_HJ_7597_01	160.289	1192.68	39224.4	16.1769	0.768023	0.768023	805	1	high
TCGA_HU_8238_01	104.69	321.309	2941.04	7298.59	0.176064	0.176064	46	0	low
TCGA_HU_8243_01	280.307	2653.46	6293.6	172.345	0.384921	0.384921	180	1	high
TCGA_HU_8244_01	44.6803	59.5729	520.925	36.5567	0.0290342	0.0290342	742	0	low
TCGA_HU_8249_01	87.8192	344.203	3430.44	212.472	0.112375	0.112375	881	0	low
TCGA_HU_8602_01	15.202	117.013	5238.09	0.460741	0.0974141	0.0974141	679	0	low
TCGA_HU_8604_01	95.249	909.743	7825.76	2.46319	0.221929	0.221929	694	0	low
TCGA_HU_8608_01	104.852	133.336	4115.21	1.21207	0.11324	0.11324	641	0	low
TCGA_HU_8610_01	20.6741	1656.16	9329.25	2.29711	0.26951	0.26951	23	0	high
TCGA_HU_A4G2_01	36.4605	300.309	4393.25	0	0.104079	0.104079	739	0	low
TCGA_HU_A4G3_01	38.8084	174.631	4419.83	3842.75	0.13312	0.13312	170	0	low
TCGA_HU_A4G6_01	9.24679	31.4377	873.249	0	0.019498	0.019498	738	0	low
TCGA_HU_A4G8_01	67.0725	162.892	3696.92	6.96845	0.0948211	0.0948211	690	0	low
TCGA_HU_A4G9_01	6.03329	28.657	669.642	0.754062	0.0148822	0.0148822	736	0	low
TCGA_HU_A4GC_01	136.501	288.095	4831.99	8391.01	0.226023	0.226023	99	0	low
TCGA_HU_A4GD_01	610.751	1446.35	4367.13	1026.84	0.400671	0.400671	692	0	high
TCGA_HU_A4GF_01	20.7102	1534.29	1806.53	1607.05	0.155885	0.155885	785	0	low
TCGA_HU_A4GH_01	58.9796	176.269	2443.46	9971.23	0.166812	0.166812	358	0	low
TCGA_HU_A4GJ_01	487.393	625.122	2884.69	88.437	0.267285	0.267285	650	0	high
TCGA_HU_A4GN_01	20.511	118.139	2834.13	0.4102	0.0609138	0.0609138	912	0	low
TCGA_HU_A4GP_01	61.5267	366.551	5269.41	6.06603	0.131815	0.131815	273	0	low
TCGA_HU_A4GQ_01	121.217	500.116	8016.85	67.1906	0.207251	0.207251	3	1	low
TCGA_HU_A4GT_01	53.6822	94.2337	2069.27	161.051	0.060653	0.060653	198	0	low
TCGA_HU_A4GU_01	12.2205	115.299	3606.04	0	0.0700595	0.0700595	200	0	low
TCGA_HU_A4GX_01	27.896	432.894	1617.68	56.8241	0.0660304	0.0660304	616	0	low
TCGA_HU_A4GY_01	1061.76	1125.08	13013.2	38.0053	0.672531	0.672531	8	0	high
TCGA_HU_A4H0_01	31.5458	244.367	1708.67	0.941673	0.0554867	0.0554867	64	0	low
TCGA_HU_A4H2_01	49.0258	587.745	3408.16	2.78554	0.112429	0.112429	394	0	low
TCGA_HU_A4H3_01	21.5007	114.672	4004.04	710.638	0.0864902	0.0864902	882	0	low
TCGA_HU_A4H4_01	64.2723	156.379	2695.74	7.59084	0.0773237	0.0773237	725	0	low
TCGA_HU_A4H5_01	44.6455	1167.22	3291.12	2.97623	0.148317	0.148317	724	0	low
TCGA_HU_A4H6_01	83.5481	3156.13	2566.41	0.746056	0.285963	0.285963	644	0	high
TCGA_HU_A4H8_01	24.5013	83.7593	907.662	94.5842	0.0300605	0.0300605	428	1	low
TCGA_HU_A4HB_01	206.821	827.811	3443.55	59746.9	0.751157	0.751157	477	1	high
TCGA_HU_A4HD_01	111.003	575.349	7386.14	403.389	0.201707	0.201707	1016	0	low
TCGA_IN_7806_01	157.298	429.569	1862.24	15.1616	0.116528	0.116528	1106	0	low
TCGA_IN_7808_01	349.507	451.132	1651.8	26.4398	0.184836	0.184836	105	1	low
TCGA_IN_8462_01	349.022	502.204	5843.65	42.6709	0.255437	0.255437	572	0	low
TCGA_IN_8663_01	29.3158	95.7641	4513.03	57.9819	0.0900463	0.0900463	103	1	low
TCGA_IN_A6RI_01	16.4881	1582.06	672.718	37.9918	0.124605	0.124605	559	0	low
TCGA_IN_A6RJ_01	49.0189	405.891	686.826	7.84339	0.0565254	0.0565254	379	0	low
TCGA_IN_A6RL_01	158.631	1191.11	3982.17	43.1365	0.202966	0.202966	406	1	low
TCGA_IN_A6RR_01	183.03	3093.09	2187	417.65	0.315827	0.315827	205	1	high
TCGA_IN_A6RS_01	7.75738	171.362	2051.55	435.821	0.051452	0.051452	383	0	low
TCGA_IN_A7NR_01	75.8195	502.065	2310.16	16.3938	0.0989206	0.0989206	198	0	low
TCGA_IN_A7NT_01	23.1793	337.755	5366	0	0.117362	0.117362	323	0	low
TCGA_IN_A7NU_01	186.001	408.012	4596.07	0	0.169188	0.169188	356	0	low
TCGA_IN_AB1V_01	233.786	871.917	653.795	91.5204	0.155833	0.155833	479	0	low
TCGA_IN_AB1X_01	144.059	202.037	2262.75	10.7599	0.10262	0.10262	411	0	low
TCGA_IP_7968_01	166.847	234.878	14899.8	28.618	0.315784	0.315784	77	0	high
TCGA_KB_A6F7_01	44.8039	827.467	6038.03	2591.09	0.193751	0.193751	1935	0	low
TCGA_KB_A93G_01	1024.21	1550.88	40734.5	97.0333	1.13242	1.13242	613	0	high
TCGA_KB_A93H_01	16.1876	227.524	673.465	422.671	0.0361395	0.0361395	1145	0	low
TCGA_KB_A93J_01	63.7855	2502.97	4537.5	15.9463	0.266113	0.266113	1124	0	high
TCGA_MX_A5UG_01	739.574	1418.63	28286.9	707.439	0.825969	0.825969	113	1	high
TCGA_MX_A5UJ_01	107.722	595.881	7493.93	7350.89	0.269253	0.269253	600	0	high
TCGA_MX_A663_01	325.559	2143.31	27296.9	34982.8	1.03206	1.03206	300	1	high
TCGA_MX_A666_01	151.43	1677.9	6053.53	12524.7	0.384478	0.384478	427	0	high
TCGA_R5_A7O7_01	144.09	657.071	3719.03	63.4005	0.157365	0.157365	1389	0	low
TCGA_R5_A7ZF_01	19.8518	370.959	1230.5	50.869	0.0526305	0.0526305	259	1	low
TCGA_R5_A7ZI_01	42.0458	87.7515	656.889	0	0.0318201	0.0318201	2267	0	low
TCGA_R5_A7ZR_01	27.7701	227.112	1177.31	37.6876	0.0447719	0.0447719	185	1	low
TCGA_R5_A805_01	70.4766	693.726	10358	2.93646	0.238794	0.238794	281	1	low
TCGA_RD_A7BS_01	592.786	1159.8	9163.88	221.645	0.443897	0.443897	336	1	high
TCGA_RD_A7BT_01	12.2021	361.994	1190.12	296.924	0.0509084	0.0509084	262	1	low
TCGA_RD_A7BW_01	625.165	2411.65	20545.4	740.396	0.727972	0.727972	156	1	high
TCGA_RD_A7C1_01	407.417	864.206	8567.34	469.125	0.348988	0.348988	507	1	high
TCGA_RD_A8MV_01	127.56	611.812	3359.59	385.815	0.145549	0.145549	3720	0	low
TCGA_RD_A8MW_01	166.672	816.684	17936.6	81.946	0.404392	0.404392	1153	1	high
TCGA_RD_A8N0_01	927.27	1714.84	7826.31	10.6689	0.580177	0.580177	1236	0	high
TCGA_RD_A8N1_01	259.908	447.014	6507.01	3.68646	0.229444	0.229444	3519	0	low
TCGA_RD_A8N2_01	433.948	2121.58	9082.29	352.19	0.451211	0.451211	3540	0	high
TCGA_RD_A8N4_01	421.82	3216.89	4779.35	460.568	0.45327	0.45327	2171	0	high
TCGA_RD_A8N5_01	498.659	722.175	27737.5	1475.54	0.689244	0.689244	1747	1	high
TCGA_RD_A8N6_01	210.997	1920.34	10833.2	9514.08	0.470809	0.470809	272	1	high
TCGA_RD_A8N9_01	919.836	2404.46	17983.9	7.7586	0.787009	0.787009	1083	0	high
TCGA_RD_A8NB_01	233.786	594.641	9083.55	24.886	0.271421	0.271421	513	1	high
TCGA_SW_A7EA_01	4.12304	202.023	9224.43	0	0.163006	0.163006	579	0	low
TCGA_SW_A7EB_01	60.8799	1125.16	5101.89	31818	0.480893	0.480893	176	0	high
TCGA_VQ_A8DT_01	97.4009	604.088	2753.55	17.794	0.120838	0.120838	1484	0	low
TCGA_VQ_A8DU_01	96.9179	799.135	20427.6	3885.35	0.453588	0.453588	166	1	high
TCGA_VQ_A8DV_01	519.228	1431.28	1962.89	132790	1.57229	1.57229	403	1	high
TCGA_VQ_A8DZ_01	57.4893	1598.05	2873.31	3299.57	0.206707	0.206707	396	1	low
TCGA_VQ_A8E0_01	11.0478	997.556	1349.15	287.895	0.0961176	0.0961176	562	1	low
TCGA_VQ_A8E2_01	168.284	2321.56	29609.1	5365.63	0.744098	0.744098	1319	0	high
TCGA_VQ_A8E3_01	330.853	559.473	8747.99	16.7285	0.298984	0.298984	661	1	high
TCGA_VQ_A8P2_01	8.36838	66.9452	2135.75	98.326	0.042744	0.042744	1160	0	low
TCGA_VQ_A8P3_01	94.1809	477.342	9632.87	21.7327	0.221303	0.221303	1132	0	low
TCGA_VQ_A8P5_01	472.067	783.81	37953.9	292.253	0.836228	0.836228	235	1	high
TCGA_VQ_A8P8_01	171.733	473.282	5177.43	150.366	0.179151	0.179151	942	0	low
TCGA_VQ_A8PB_01	28.2041	363.683	11244.8	6.92714	0.215203	0.215203	1043	1	low
TCGA_VQ_A8PC_01	269.916	826.262	10888.1	57.0048	0.329544	0.329544	1407	1	high
TCGA_VQ_A8PD_01	289.562	505.739	9674.36	6.06065	0.295014	0.295014	496	1	high
TCGA_VQ_A8PE_01	70.6155	671.411	6693.22	14334.5	0.313982	0.313982	675	1	high
TCGA_VQ_A8PF_01	197.735	375.29	10290.7	9.05123	0.262563	0.262563	76	1	low
TCGA_VQ_A8PH_01	11.5716	952.177	2645.37	2368.88	0.133648	0.133648	389	1	low
TCGA_VQ_A8PJ_01	135.561	476.779	8600.07	673.839	0.225972	0.225972	82	1	low
TCGA_VQ_A8PK_01	148.334	1414.99	9702.57	383.33	0.309274	0.309274	543	1	high
TCGA_VQ_A8PM_01	316.387	1985.34	14321.5	18967.3	0.658839	0.658839	57	1	high
TCGA_VQ_A8PO_01	85.1572	166.092	7195.6	0	0.15762	0.15762	282	1	low
TCGA_VQ_A8PP_01	101.608	255.64	14557.8	22.0038	0.287856	0.287856	712	1	high
TCGA_VQ_A8PQ_01	949.142	1427.32	14412.2	1318.25	0.686486	0.686486	476	1	high
TCGA_VQ_A8PU_01	50.4144	695.51	2876.1	8.23044	0.111783	0.111783	832	1	low
TCGA_VQ_A8PX_01	51.4183	1034.71	1627.02	92.5587	0.115973	0.115973	1964	0	low
TCGA_VQ_A91A_01	124.253	774.079	29703.6	10.107	0.573862	0.573862	1200	0	high
TCGA_VQ_A91D_01	46.0819	256.013	12101.4	1.53608	0.228082	0.228082	356	1	low
TCGA_VQ_A91E_01	82.8477	128.949	2426.24	9.96702	0.0779409	0.0779409	664	0	low
TCGA_VQ_A91K_01	87.9178	300.225	7301.63	7.49315	0.169507	0.169507	1862	0	low
TCGA_VQ_A91N_01	101.929	984.833	3833.44	445.99	0.169695	0.169695	570	1	low
TCGA_VQ_A91Q_01	485.67	3204.65	14159.7	40.7557	0.62204	0.62204	633	1	high
TCGA_VQ_A91S_01	66.2471	957.942	17049.2	11.3394	0.362473	0.362473	1000	0	high
TCGA_VQ_A91U_01	37.6394	307.216	4367.13	3.0519	0.104588	0.104588	52	1	low
TCGA_VQ_A91V_01	60.0576	888.345	1666.3	25.1402	0.109176	0.109176	1297	0	low
TCGA_VQ_A91W_01	26.0977	95.0691	2416.83	1.86414	0.054713	0.054713	1851	0	low
TCGA_VQ_A91X_01	8.12295	462.106	1012.48	65.8845	0.0511922	0.0511922	289	1	low
TCGA_VQ_A91Y_01	349.24	1204.24	13637.5	113.865	0.428734	0.428734	296	1	high
TCGA_VQ_A91Z_01	11.3728	1202.9	1513.05	279.645	0.112731	0.112731	1690	0	low
TCGA_VQ_A922_01	128.132	1499.06	21332	904.079	0.498843	0.498843	275	1	high
TCGA_VQ_A924_01	45.5529	177.465	7139.45	0	0.143047	0.143047	1686	1	low
TCGA_VQ_A925_01	82.6098	386.486	3123.7	30.6186	0.106715	0.106715	138	1	low
TCGA_VQ_A927_01	274.938	588.031	9614.19	20437.5	0.487286	0.487286	200	1	high
TCGA_VQ_A928_01	163.529	516.136	17163	14.8049	0.369805	0.369805	174	1	high
TCGA_VQ_A92D_01	79.661	129.753	8030.2	3974.72	0.20406	0.20406	2032	0	low
TCGA_VQ_A94O_01	20.5169	339.663	5113.23	9808.75	0.205117	0.205117	640	1	low
TCGA_VQ_A94P_01	517.356	3228.73	10730	235.533	0.582129	0.582129	81	1	high
TCGA_VQ_A94R_01	353.514	559.278	14701.8	84.9246	0.403264	0.403264	1294	1	high
TCGA_VQ_A94T_01	61.5744	271.649	17742.5	34.669	0.325482	0.325482	342	1	high
TCGA_VQ_A94U_01	541.094	1036.72	10521.6	26.2673	0.436588	0.436588	819	0	high
TCGA_VQ_AA64_01	147.725	745.346	34549	10.8474	0.658105	0.658105	560	1	high
TCGA_VQ_AA68_01	120.305	729.48	2780.6	0	0.137975	0.137975	1328	0	low
TCGA_VQ_AA69_01	36.0731	28.2304	1905.62	1.04557	0.0456141	0.0456141	864	0	low
TCGA_VQ_AA6A_01	82.9117	916.459	3938.24	17.6099	0.155748	0.155748	1184	0	low
TCGA_VQ_AA6B_01	71.7512	137.333	6618.93	35.3126	0.141872	0.141872	1002	0	low
TCGA_VQ_AA6D_01	17.9983	1874.68	1434.66	4483.09	0.199223	0.199223	521	0	low
TCGA_VQ_AA6F_01	135.136	392.195	2062.25	8.79944	0.10905	0.10905	1646	0	low
TCGA_VQ_AA6G_01	67.6506	178.831	2914.85	28.8012	0.0837915	0.0837915	792	1	low
TCGA_VQ_AA6I_01	78.2259	271.554	3073.85	3.98606	0.0962595	0.0962595	491	1	low
TCGA_VQ_AA6J_01	172.922	780.499	7420.53	324.948	0.238036	0.238036	838	0	low
TCGA_VQ_AA6K_01	423.7	2720.34	7802.47	348.537	0.467603	0.467603	378	1	high
TCGA_ZA_A8F6_01	392.467	950.658	5459.06	432.864	0.299267	0.299267	525	0	high
TCGA_ZQ_A9CR_01	58.8218	625.122	12396.8	9.65752	0.26261	0.26261	24	1	high

## Sheet: S9
Supplementary Table S9. The evaluation metrics of PRGS in training and testing cohorts.
Cohort	1-year AUC	3-year AUC	5-year AUC
TCGA-STAD	0.601	0.663	0.717
GSE66229	0.607	0.709	0.707
GSE15459	0.657	0.674	0.711

## Sheet: S10
Supplementary Table S10. GSE66229 database with consensus clustering
	ABCA6	APOB	CTSF	VCAN	Cluster
GSM1523728	1.12336	2.50879	2.08791	3.21632	C1
GSM1523729	1.0951	2.24404	2.08341	3.09218	C1
GSM1523746	1.09818	3.48815	2.39753	2.86121	C1
GSM1523748	1.37861	2.51705	2.13321	2.92762	C1
GSM1523768	1.40636	1.51585	2.1302	3.44333	C1
GSM1523769	1.34201	2.49666	2.11851	3.24427	C1
GSM1523771	1.68818	1.4244	2.45871	3.41167	C1
GSM1523772	1.37707	2.26511	2.35724	3.49944	C1
GSM1523773	1.79185	1.29942	2.40939	3.51865	C1
GSM1523774	1.78632	1.33892	2.36213	3.05663	C1
GSM1523779	1.01284	2.45341	2.09898	2.65328	C1
GSM1523781	0.933639	3.72579	2.51659	2.74834	C1
GSM1523783	1.24112	2.84417	2.14753	2.89768	C1
GSM1523785	1.18435	2.96366	2.17056	3.111	C1
GSM1523789	1.39001	1.61273	2.10643	3.40343	C1
GSM1523796	1.47183	1.23584	2.31314	3.83584	C1
GSM1523797	0.979531	2.47722	2.38151	2.81911	C1
GSM1523798	1.4525	2.62786	2.24849	2.95812	C1
GSM1523799	2.38311	2.95931	2.03433	2.8322	C1
GSM1523801	0.992343	2.43342	2.26585	2.61007	C1
GSM1523802	1.20997	2.69523	2.08915	2.68486	C1
GSM1523807	1.10278	2.13512	2.14098	3.15888	C1
GSM1523808	1.42993	1.75572	2.17593	3.31835	C1
GSM1523811	1.12425	2.29207	2.0034	2.96928	C1
GSM1523820	1.49117	2.64518	2.64646	2.71473	C1
GSM1523821	1.07654	2.97195	2.02856	2.72441	C1
GSM1523826	1.28309	3.0498	2.34097	3.09306	C1
GSM1523829	1.3199	3.58868	2.10325	2.78307	C1
GSM1523832	1.3081	3.29677	2.2636	3.16691	C1
GSM1523834	1.23494	2.41236	2.2936	3.28069	C1
GSM1523835	1.2997	2.14318	2.64615	3.32433	C1
GSM1523837	1.03804	2.31048	1.99414	2.95948	C1
GSM1523839	1.28025	2.0029	2.01898	3.38996	C1
GSM1523842	1.02256	2.98537	2.13402	2.79148	C1
GSM1523844	1.14586	1.88898	2.45258	3.72241	C1
GSM1523849	1.26188	2.36683	2.3461	3.54012	C1
GSM1523852	1.18011	3.74194	2.18508	2.95224	C1
GSM1523853	1.04461	3.07096	2.06525	3.2205	C1
GSM1523855	1.0318	2.67171	2.1955	2.69533	C1
GSM1523857	1.17974	2.1172	2.41494	3.36314	C1
GSM1523858	1.78587	1.40176	2.60346	3.47221	C1
GSM1523861	1.00173	3.0324	2.30785	2.75491	C1
GSM1523862	1.64847	1.57389	2.26249	3.20325	C1
GSM1523867	1.23315	2.85457	2.09005	2.80432	C1
GSM1523869	1.2878	2.46268	2.10044	2.93362	C1
GSM1523872	1.46769	1.54879	2.13528	3.36337	C1
GSM1523874	1.13496	2.82519	2.18285	3.18268	C1
GSM1523879	1.05173	2.28267	2.30874	2.87846	C1
GSM1523884	1.3988	2.41154	2.18184	3.09401	C1
GSM1523886	1.58214	1.43843	2.22006	3.66644	C1
GSM1523892	1.10653	2.58478	2.10781	3.06003	C1
GSM1523893	1.01959	2.59214	2.11404	2.91923	C1
GSM1523918	1.57765	1.23916	2.42827	3.53963	C1
GSM1523919	1.1199	3.69546	2.07922	2.98763	C1
GSM1523925	1.04762	3.71066	2.10666	2.83554	C1
GSM1523927	1.25488	2.85267	2.02678	3.13991	C1
GSM1523929	1.10681	3.14604	2.11146	2.90118	C1
GSM1523935	1.34944	1.23355	2.45669	3.87525	C1
GSM1523936	1.27354	2.1544	2.30491	3.36212	C1
GSM1523937	1.11036	2.48012	2.13056	2.94568	C1
GSM1523938	1.48697	1.25778	2.40879	3.73408	C1
GSM1523939	1.58221	1.27709	2.63615	3.51357	C1
GSM1523948	1.56149	1.40674	2.33241	3.30427	C1
GSM1523949	1.91796	1.44893	2.41184	3.58805	C1
GSM1523953	0.917771	2.82411	2.01022	2.79632	C1
GSM1523954	1.03037	3.40352	2.03712	2.84235	C1
GSM1523962	1.73988	3.42612	2.46922	3.46067	C1
GSM1523968	1.66203	1.41893	2.43835	3.56541	C1
GSM1523969	1.45274	3.43701	2.3423	3.13982	C1
GSM1523970	0.946314	2.72898	2.13142	2.7777	C1
GSM1523971	1.36987	2.36995	2.47616	3.22828	C1
GSM1523972	0.882285	2.54383	2.38803	2.92343	C1
GSM1523976	0.968925	2.57613	2.4102	3.04724	C1
GSM1523977	1.13065	4.09247	2.22743	2.86275	C1
GSM1523978	1.00974	2.68732	2.23461	2.95683	C1
GSM1523980	1.59201	2.34466	2.25443	3.3061	C1
GSM1523981	1.50408	1.15816	2.31282	3.58718	C1
GSM1523982	1.61162	1.25636	2.50502	3.89489	C1
GSM1523986	1.07676	3.0678	2.23182	3.12861	C1
GSM1523988	1.59076	1.39459	2.52969	3.47054	C1
GSM1523991	1.35702	2.59136	2.30678	3.39769	C1
GSM1523992	0.982773	2.32039	2.25719	2.9487	C1
GSM1523994	1.2802	2.94871	2.28921	3.00196	C1
GSM1523998	1.00205	1.99886	2.10478	3.27063	C1
GSM1524000	1.25845	2.22381	2.06156	3.29973	C1
GSM1524001	1.14911	2.68524	2.01437	2.85313	C1
GSM1524003	1.00821	2.52791	2.02624	2.67004	C1
GSM1524005	1.07533	2.70302	2.14278	2.92977	C1
GSM1524006	2.10584	1.43467	2.49587	3.51436	C1
GSM1524007	1.22697	2.6194	2.35511	3.07028	C1
GSM1524010	1.56034	3.60609	2.38826	3.14297	C1
GSM1524011	1.02344	2.75246	2.07371	2.77096	C1
GSM1524015	1.5827	2.95716	2.25992	3.28717	C1
GSM1524020	1.07083	2.09767	2.28715	3.00017	C1
GSM1524026	1.35047	1.5619	2.31163	3.55121	C1
GSM1524029	1.42516	1.23365	2.6902	3.22929	C1
GSM1524030	1.71771	1.6675	2.6918	3.25506	C1
GSM1524034	1.44749	2.54337	2.32847	3.11068	C1
GSM1524035	1.83531	1.29707	2.43933	3.41794	C1
GSM1524037	1.34432	2.99545	2.23952	3.5202	C1
GSM1524042	1.1944	2.06478	2.27405	3.12032	C1
GSM1524044	1.24782	1.87129	2.33349	3.32578	C1
GSM1524046	1.34093	1.59594	2.28769	3.30591	C1
GSM1524050	0.990131	2.84744	2.08919	3.02033	C1
GSM1524051	1.37394	2.28395	2.02076	3.03657	C1
GSM1524055	1.09236	2.03465	2.27556	3.47528	C1
GSM1524057	1.54685	1.26704	2.527	3.4006	C1
GSM1524058	1.28996	1.35306	2.38441	3.47444	C1
GSM1524059	1.61319	1.21075	2.28652	3.53753	C1
GSM1524062	1.8319	1.4653	2.60734	3.36183	C1
GSM1524069	1.01254	2.68252	2.00997	2.68051	C1
GSM1524071	1.07789	3.51938	2.25681	3.09398	C1
GSM1523727	1.00358	1.35428	2.03442	2.61568	C2
GSM1523744	1.02983	1.33542	2.07366	3.0492	C2
GSM1523745	1.03785	1.33459	2.12775	3.22847	C2
GSM1523747	1.04612	2.24016	2.09446	2.83389	C2
GSM1523765	0.973951	1.4111	2.24117	3.03468	C2
GSM1523770	0.893953	1.22568	1.93918	3.05524	C2
GSM1523775	1.14736	2.23625	1.97666	2.81843	C2
GSM1523776	1.14946	1.5719	1.88345	3.12549	C2
GSM1523777	0.968827	1.34787	2.06043	2.99337	C2
GSM1523778	1.41747	1.25457	2.37728	3.20592	C2
GSM1523780	0.989569	1.15124	2.06803	3.51891	C2
GSM1523782	1.07331	1.24471	2.18025	3.17727	C2
GSM1523784	1.32777	1.25489	2.27481	3.23334	C2
GSM1523786	1.38797	1.2781	2.17086	3.15527	C2
GSM1523787	1.09307	1.8435	2.08616	2.54677	C2
GSM1523788	1.53457	1.10069	2.24764	3.531	C2
GSM1523790	0.983096	1.27573	2.03531	3.49527	C2
GSM1523791	1.07904	1.24877	1.93363	3.27816	C2
GSM1523792	1.1044	1.87619	2.03179	2.74958	C2
GSM1523793	1.10501	1.73727	2.64129	2.82774	C2
GSM1523794	1.11425	1.22332	2.3523	3.5631	C2
GSM1523795	1.11175	1.40824	2.4158	3.11189	C2
GSM1523800	0.965617	1.36701	1.96056	2.54342	C2
GSM1523803	1.00238	1.3159	1.98544	2.78216	C2
GSM1523804	1.41935	1.20418	2.14941	3.18273	C2
GSM1523805	1.55337	1.25916	2.14398	3.46028	C2
GSM1523806	1.20138	1.24269	2.2582	2.8678	C2
GSM1523809	1.11798	1.23396	2.09753	2.77161	C2
GSM1523810	1.03166	1.24219	2.11451	3.25628	C2
GSM1523812	1.50306	1.22951	2.11848	3.33373	C2
GSM1523813	1.20763	1.23534	2.07498	3.36953	C2
GSM1523814	1.10357	1.23676	2.39044	2.70447	C2
GSM1523815	1.12818	1.27919	1.98468	3.05794	C2
GSM1523816	1.0486	2.00929	2.08464	2.49511	C2
GSM1523817	1.16929	1.18697	2.45743	3.0513	C2
GSM1523818	0.985675	1.24107	1.97609	2.7319	C2
GSM1523819	1.04666	1.43475	2.2866	2.82758	C2
GSM1523822	1.17231	1.21509	2.11753	3.37396	C2
GSM1523823	1.03622	1.23035	2.03385	3.15025	C2
GSM1523824	1.08402	1.19521	2.12786	2.95275	C2
GSM1523825	0.98844	1.23686	2.25673	3.2236	C2
GSM1523827	1.64515	1.09057	2.35706	2.98901	C2
GSM1523828	1.24083	1.19019	2.36311	3.3949	C2
GSM1523830	0.981941	1.398	2.05353	2.70992	C2
GSM1523831	0.946873	2.39674	1.90609	2.87311	C2
GSM1523833	1.17313	1.45587	2.07256	3.04814	C2
GSM1523836	1.28828	1.38053	1.90474	3.39249	C2
GSM1523838	1.09242	1.27632	1.89436	3.24209	C2
GSM1523840	1.15264	2.0401	2.17721	2.72434	C2
GSM1523841	1.06602	1.18849	1.92621	3.1445	C2
GSM1523843	1.18586	1.20255	2.51514	3.04969	C2
GSM1523845	1.08335	1.15912	2.29478	3.24392	C2
GSM1523846	1.46933	1.12091	2.16525	3.25502	C2
GSM1523847	0.962111	1.27182	2.10575	2.87943	C2
GSM1523848	1.33855	1.2675	2.04483	3.47386	C2
GSM1523850	1.47087	1.30509	2.29318	3.34183	C2
GSM1523851	1.00005	1.22034	2.07775	2.87049	C2
GSM1523854	1.25193	1.17151	2.09924	3.04798	C2
GSM1523856	1.01029	1.12281	2.09442	3.36002	C2
GSM1523859	1.01751	1.65932	2.00426	2.86626	C2
GSM1523860	0.985727	1.21147	2.01415	3.14527	C2
GSM1523863	1.1144	1.14516	1.91666	2.86357	C2
GSM1523864	1.21075	1.39893	1.90201	2.94685	C2
GSM1523865	1.15301	1.19797	2.00403	3.14207	C2
GSM1523866	1.57974	1.11247	2.23293	3.37898	C2
GSM1523868	1.28842	1.32449	2.0524	3.09952	C2
GSM1523870	1.05655	1.33119	1.95795	2.88276	C2
GSM1523871	1.08612	2.16309	2.00445	2.84254	C2
GSM1523873	1.13276	1.57874	2.21543	2.76662	C2
GSM1523875	1.02598	1.13347	2.33308	2.70538	C2
GSM1523876	1.12877	1.67809	1.94064	2.66993	C2
GSM1523877	1.01152	1.30829	2.5208	2.71062	C2
GSM1523878	1.42991	1.29872	2.11314	2.86998	C2
GSM1523880	1.05765	1.06054	2.04271	2.66016	C2
GSM1523881	1.26788	1.23379	2.43399	2.77569	C2
GSM1523882	1.02223	1.26491	1.9628	2.3258	C2
GSM1523883	1.08696	1.92373	1.97907	2.63891	C2
GSM1523885	1.02655	1.23501	2.03246	2.7866	C2
GSM1523887	0.989247	1.28143	1.96595	3.05428	C2
GSM1523888	1.07578	1.29496	1.9941	3.01504	C2
GSM1523889	1.09423	1.18304	2.43774	2.41363	C2
GSM1523890	1.22365	1.19729	2.10161	2.86371	C2
GSM1523891	1.30035	1.35968	2.16157	3.32215	C2
GSM1523894	1.01099	1.4824	2.18398	2.60207	C2
GSM1523895	1.01974	1.25785	2.22824	2.54445	C2
GSM1523896	1.20904	1.19055	2.01193	2.94014	C2
GSM1523897	1.01468	1.25754	2.0999	2.38183	C2
GSM1523898	1.03772	1.21527	2.06852	2.84515	C2
GSM1523899	1.03558	1.63263	2.41031	3.05757	C2
GSM1523901	1.04426	1.27333	2.08285	2.98436	C2
GSM1523903	0.958794	1.22582	2.37844	3.24518	C2
GSM1523904	1.19528	1.38172	2.26432	2.82811	C2
GSM1523905	1.16487	1.29057	2.07467	3.00044	C2
GSM1523906	1.47767	1.13274	2.04909	3.10499	C2
GSM1523908	1.03147	1.16572	2.13944	3.12553	C2
GSM1523909	0.989247	1.23746	2.02412	3.0404	C2
GSM1523910	1.04547	1.23715	2.03219	2.71597	C2
GSM1523911	1.07298	1.21218	2.3466	2.50739	C2
GSM1523920	1.36791	1.27487	2.25415	2.87328	C2
GSM1523921	1.0109	1.2147	2.09063	3.15924	C2
GSM1523922	0.991757	1.4539	2.24778	3.39692	C2
GSM1523923	1.21376	1.22794	2.05776	2.788	C2
GSM1523924	1.43146	1.38745	2.23633	3.21581	C2
GSM1523926	0.921466	1.37195	2.09126	2.63758	C2
GSM1523928	0.902194	1.2742	2.1487	2.95286	C2
GSM1523930	0.989429	1.83693	2.06539	3.28909	C2
GSM1523931	1.12824	1.3772	2.20341	2.89844	C2
GSM1523932	1.02292	1.52229	2.304	2.60943	C2
GSM1523933	0.983876	2.01925	2.04097	3.00054	C2
GSM1523934	1.26003	1.18071	2.16612	3.09723	C2
GSM1523940	1.00816	1.17061	2.54474	2.82348	C2
GSM1523941	1.04265	1.83201	2.07044	3.0011	C2
GSM1523942	1.03866	2.05837	2.02627	2.97786	C2
GSM1523943	1.01162	1.21488	2.30906	2.99411	C2
GSM1523944	0.963801	1.72486	2.03413	2.7172	C2
GSM1523945	1.14086	1.30867	2.28077	3.58196	C2
GSM1523946	1.02068	1.98093	2.1612	2.76001	C2
GSM1523947	1.04839	1.26872	2.06458	2.48185	C2
GSM1523950	1.00016	1.21362	2.14724	2.20311	C2
GSM1523951	1.2233	1.25024	2.10669	3.10197	C2
GSM1523952	1.19292	1.28528	2.18518	3.07753	C2
GSM1523955	1.53429	1.18765	2.46001	2.86313	C2
GSM1523956	0.974837	1.64635	2.02763	2.96608	C2
GSM1523957	1.02282	1.34714	1.98838	2.98861	C2
GSM1523958	1.51913	1.1522	2.17996	3.07598	C2
GSM1523959	1.0626	1.674	2.06076	2.8552	C2
GSM1523960	1.02076	1.19136	2.04524	3.12252	C2
GSM1523961	0.938484	1.57339	2.25691	2.76191	C2
GSM1523963	1.29754	1.5111	2.24746	2.87895	C2
GSM1523964	1.02759	1.66458	1.89017	2.8971	C2
GSM1523965	1.1517	1.128	2.14477	3.39439	C2
GSM1523966	1.1586	1.21199	2.06899	2.88801	C2
GSM1523967	1.25199	1.31478	2.20548	3.18818	C2
GSM1523973	1.16444	1.18364	2.12728	3.11689	C2
GSM1523974	1.01654	1.09218	1.95423	2.67953	C2
GSM1523975	1.60251	1.22079	2.26013	3.20153	C2
GSM1523979	1.12479	1.34616	2.02814	3.1155	C2
GSM1523983	0.952822	1.14015	2.15811	3.38065	C2
GSM1523984	1.01731	1.27152	2.17509	3.01118	C2
GSM1523985	1.0274	1.18251	1.98923	3.18447	C2
GSM1523987	1.35839	1.4035	2.16838	3.10546	C2
GSM1523989	1.32662	1.17119	2.38539	3.37831	C2
GSM1523990	0.962139	1.28011	2.12883	3.69086	C2
GSM1523993	1.22816	1.29551	2.32485	2.967	C2
GSM1523995	1.0798	1.38786	1.98978	3.00664	C2
GSM1523996	1.12527	1.46391	2.23305	3.32097	C2
GSM1523997	0.913636	1.21575	2.20174	2.98178	C2
GSM1523999	1.21973	1.31228	2.12453	2.58793	C2
GSM1524002	0.955989	1.14336	1.89933	2.70386	C2
GSM1524004	1.12438	1.25281	2.13012	2.91725	C2
GSM1524008	0.97873	1.21858	1.94354	2.70446	C2
GSM1524009	1.4528	1.1536	2.20008	3.50711	C2
GSM1524012	0.966544	1.96177	2.03116	2.93133	C2
GSM1524013	1.14197	1.16527	1.89548	2.78892	C2
GSM1524014	1.0608	1.87786	1.91369	3.03047	C2
GSM1524016	1.22663	1.29019	2.1102	3.0282	C2
GSM1524017	1.09796	1.36032	2.02102	2.87864	C2
GSM1524018	0.970652	1.98668	2.0045	2.72715	C2
GSM1524019	1.2051	1.26366	1.98916	3.081	C2
GSM1524021	1.24379	1.21898	2.1213	3.13946	C2
GSM1524022	1.45718	1.14397	2.20353	3.51015	C2
GSM1524023	0.881132	1.62834	2.0145	2.9858	C2
GSM1524024	1.03581	1.21179	2.26204	3.20477	C2
GSM1524025	1.03701	1.36869	2.06028	3.31404	C2
GSM1524027	1.07433	1.12493	2.40114	2.99865	C2
GSM1524028	1.07994	1.83801	2.12269	2.87071	C2
GSM1524031	0.988414	1.24511	2.10362	3.03854	C2
GSM1524032	0.896695	1.15931	2.10539	3.43182	C2
GSM1524033	1.04842	1.15894	1.93806	3.05203	C2
GSM1524036	1.14779	1.25697	2.10759	3.36727	C2
GSM1524038	0.968597	1.71168	2.207	3.31915	C2
GSM1524039	1.4755	1.15539	2.21577	3.45909	C2
GSM1524040	1.2031	1.33373	2.31203	2.83717	C2
GSM1524041	1.17321	1.21094	1.95893	3.27331	C2
GSM1524043	1.00365	1.10804	2.03551	3.051	C2
GSM1524045	1.14134	1.1976	2.18829	2.79662	C2
GSM1524047	1.14501	1.40366	2.21929	3.23859	C2
GSM1524048	1.12775	1.31803	2.09954	3.6698	C2
GSM1524049	1.24306	1.14306	2.19786	3.77443	C2
GSM1524052	1.20967	1.4733	2.50798	3.10425	C2
GSM1524053	1.00777	1.29371	2.04713	3.19291	C2
GSM1524054	1.02083	1.87796	2.03656	2.90484	C2
GSM1524056	0.936419	1.21015	2.9663	2.72762	C2
GSM1524060	0.950179	1.13221	2.38034	2.67835	C2
GSM1524061	0.982522	1.29843	1.93061	2.71784	C2
GSM1524068	0.926517	1.24718	1.92616	3.0075	C2
GSM1524070	0.933605	1.32788	2.19591	2.98765	C2
GSM1524072	1.19379	1.18803	2.31039	3.02012	C2

[truncated: 3 more sheets: S11, S12, S13]
